# Supplementary material
Source: publisher site journal article supplement (https://www.dovepress.com/get_supplementary_file.php?f=415399.xlsx)
Supplement: Supplementary file 1 [file get_supplementary_file.php]

## Sheet: Summary
Table S1: Clinical trials of bone metastases from ClinicalTrials.gov
Table S2: Clinical trials of bone metastases from pharma.id.informa.com
TableS3: Merged clinical trials of bone metastases from both databases

## Sheet: Table S1
Table S1: Clinical trials of bone metastases from ClinicalTrials.gov
Rank	NCT Number	Title	Acronym	Status	Study Results	Conditions	Interventions	Outcome Measures	Sponsor/Collaborators	Gender	Age	Phases	Enrollment	Funded Bys	Study Type	Study Designs	Other IDs	Start Date	Primary Completion Date	Completion Date	First Posted	Results First Posted	Last Update Posted	Locations	Study Documents	URL
1	NCT03550508	Safety, Tolerability and PK/PD of JMT103 in Patients With Bone Metastases From Tumors	JMT103	Unknown status	No Results Available	Bone Metastases	Biological: Anti-RANKL Monoclonal Antibody	Number of participants with treatment-related adverse events as assessed by CTCAE v4.03|Anti-Drug Antibody of Anti-RANKL Monoclonal Antibody (JMT103) in Patients With Bone Metastases From Tumors|Maximum serum Concentration (Cmax) after single dose injection of Anti-RANKL Monoclonal Antibody (JMT103)|Peak Time (Tmax) after single dose injection of Anti-RANKL Monoclonal Antibody (JMT103)|Area Under…	Shanghai JMT-Bio Inc.|Quintiles, Inc.|Covance|KingMed Diagnostics	All	18 Years to 75 Years (Adult, Older Adult)	Phase 1	36	Industry|Other	Interventional	Allocation: N/A|Intervention Model: Single Group Assignment|Masking: None (Open Label)|Primary Purpose: Treatment	JMT103CN01	2018-05-21	2019-08-30	2019-12-01	2018-06-08		2018-06-08	Shanghai East Hospital, Shanghai, China		https://ClinicalTrials.gov/show/NCT03550508
2	NCT03895216	Identification and Characterization of Predictive Factors of Onset of Bone Metastases in Cancer Patients	PreMetOn	Completed	No Results Available	Bone Metastases		Changes in miRNAs content of circulating tumor exosomes|Change in protein content of circulating tumor exosomes|Relationship between plasma levels of circulating tumor exosomes and their content in miRNAs with overall survival and progression of the disease.|Cross-talk between isolated circulating tumor exosomes and commercial lines of bone tissue cells in the metastatic process.	Istituto Ortopedico Rizzoli	All	18 Years and older (Adult, Older Adult)		34	Other	Observational	Observational Model: Cohort|Time Perspective: Prospective	CE AVEC 352/2018/Sper/IOR	2018-12-03	2021-05-31	2021-12-31	2019-03-29		2022-03-22	Dipartimento Rizzoli Sicialia - Istituto Ortopedico Rizzoli, Bagheria, Palermo, Italy		https://ClinicalTrials.gov/show/NCT03895216
3	NCT02356497	Prospective Evaluation of Interventional Studies on Bone Metastases - the PRESENT Cohort	PRESENT	Recruiting	No Results Available	Bone Metastases		Pain response|Health-related Quality of Life|Toxicity according to CTCAE version 4|Readmission|Survival	UMC Utrecht	All	18 Years and older (Adult, Older Adult)		2500	Other	Observational	Observational Model: Cohort|Time Perspective: Prospective	NL49273.041.14	2023-06-13	2023-12-22	2023-12-23	2015-02-05		2019-09-25	University Medical Center Utrecht, Utrecht, Netherlands		https://ClinicalTrials.gov/show/NCT02356497
4	NCT04592887	Feasibility Study of FLASH Radiotherapy for the Treatment of Symptomatic Bone Metastases	FAST-01	Active, not recruiting	No Results Available	Bone Metastasis	Radiation: FLASH Radiotherapy	Workflow feasibility|Assessment of radiation-related toxicities that are possibly, probably, or definitely related to FLASH radiotherapy.|Pain relief|Use of pain medication.	Varian, a Siemens Healthineers Company	All	18 Years and older (Adult, Older Adult)	Not Applicable	10	Industry	Interventional	Allocation: N/A|Intervention Model: Single Group Assignment|Masking: None (Open Label)|Primary Purpose: Treatment	VAR-2019-02	2020-11-03	2023-12-22	2023-12-22	2020-10-19		2021-11-01	Cincinnati Children's Proton Therapy Center, Cincinnati, Ohio, United States		https://ClinicalTrials.gov/show/NCT04592887
5	NCT05250687	MR Guided Focused Ultrasound vs Radiotherapy for Palliative Pain Tx in Bone Metastases		Not yet recruiting	No Results Available	Bone Metastases	Procedure: MR- High intensity focused ultrasound|Radiation: External beam radiotherapy	Number of participants that achieve a complete response (CR) or partial response (PR)|Patient-reported pain scores - Pain Diary|Patient-reported pain scores - BPI (Brief Pain Inventory)|Physician-reported adverse events|Patient-reported quality of life - EORTC QLQ-BM22|Patient-reported quality of life - EORTC QLQ-C15-PAL|Patient-reported quality of life - EQ-5D-5L|Patient-reported quality of life…	Stanford University	All	18 Years and older (Adult, Older Adult)	Not Applicable	50	Other	Interventional	Allocation: Randomized|Intervention Model: Parallel Assignment|Masking: None (Open Label)|Primary Purpose: Treatment	IRB-62458	2023-08-22	2023-08-23	2023-02-24	2022-02-22		2022-06-13	Stanford University, Palo Alto, California, United States		https://ClinicalTrials.gov/show/NCT05250687
6	NCT04159376	Assessment of the Accuracy of PET/MR in Detection and Monitoring Response of Bone Metastases		Unknown status	No Results Available	Bone Metastases	Diagnostic Test: PET/MR	The investigators will report about the number of patients who preformed PET/MR for assessment of skeletal involvement as well as activity after treatment,	Tel-Aviv Sourasky Medical Center	All	18 Years to 120 Years (Adult, Older Adult)	Not Applicable	150	Other	Interventional	Allocation: N/A|Intervention Model: Single Group Assignment|Masking: None (Open Label)|Primary Purpose: Diagnostic	TASMC-19-ES-0574-CTIL	2019-12-25	2020-02-25	2021-12-25	2019-11-12		2019-11-12			https://ClinicalTrials.gov/show/NCT04159376
7	NCT04080271	Role of Positron Emission Tomography/ Computed Tomography (PET/CT) and in Bone Metastases.	PET/CT	Completed	No Results Available	Bone Metastases	Device: 18F-FDG PET/CT	description of bone metastases detected by PET/CT in cancer patients.|compare diagnostic performance of PET/CT, planar bone scintigraphy and SPECT/CT in detecting bone metastases|risk benefit of PET/CT examination in cancer patients	Assiut University	All	Child, Adult, Older Adult		66	Other	Observational	Observational Model: Other|Time Perspective: Prospective	PET/CT in bone metastases	2019-11-01	2021-11-01	2021-12-01	2019-09-06		2022-06-30	Assiut university hospital, Assiut, Egypt		https://ClinicalTrials.gov/show/NCT04080271
8	NCT04812509	Efficacy and Safety of MW032 and Xgeva® in Subjects With Bone Metastases From Solid Tumors		Active, not recruiting	No Results Available	Bone Metastases	Drug: MW032|Drug: Xgeva	uNTx/uCr|S-BALP|SRE	Mabwell (Shanghai) Bioscience Co., Ltd.	All	18 Years and older (Adult, Older Adult)	Phase 3	706	Industry	Interventional	Allocation: Randomized|Intervention Model: Parallel Assignment|Masking: Quadruple (Participant, Care Provider, Investigator, Outcomes Assessor)|Primary Purpose: Treatment	MW032-2019-CP301	2020-03-20	April 29, 2021	2022-02-06	2021-03-23		2021-09-02	Fifth Medical Center of PLA General Hospital, Beijing, Beijing, China		https://ClinicalTrials.gov/show/NCT04812509
9	NCT04550949	To Evaluate the Efficacy and Safety of QL1206 and Xgeva in Patients With Bone Metastases From Solid Tumors		Unknown status	No Results Available	Bone Metastases	Drug: QL1206|Drug: Xgeva	uNTx/uCr|S-BALP|SRE	Qilu Pharmaceutical Co., Ltd.	All	18 Years to 80 Years (Adult, Older Adult)	Phase 3	700	Industry	Interventional	Allocation: Randomized|Intervention Model: Parallel Assignment|Masking: Quadruple (Participant, Care Provider, Investigator, Outcomes Assessor)|Primary Purpose: Treatment	QL1206-003	April 26, 2019	2021-03-01	2022-06-10	2020-09-16		2020-09-22	Beijing Cancer Hospital, Beijing, Beijing, China|Sun Yat-sen University Cancer Hospital, Guangzhou, Guangdong, China		https://ClinicalTrials.gov/show/NCT04550949
10	NCT02774213	A Study to Collect Data About Analgesia in Patients With Bone Metastasis		Completed	Has Results	Bone Metastasis	Other: Questionnaires completion|Other: Clinical Pain Assessments	Patient's Change From Baseline of Pain Severity, as Measured by the Weekly Means of the Daily Average Pain Scores (APS)|Patient's Change From Baseline of Pain Severity, as Measured by the Weekly Means of the Daily Worst Pain Score (WPS)|Patient's Change From Baseline of Pain Severity as Measured by the Brief Pain Inventory (BPI)|Patient's Change From Baseline of Investigator Global Assessment of …	Tools4Patient	All	18 Years and older (Adult, Older Adult)		74	Other	Observational	Observational Model: Case-Only|Time Perspective: Prospective	T2001-01	2023-07-14	April 28, 2017	April 28, 2017	2016-05-17	2019-08-19	2019-08-19	Institut Bordet, Brussels, Belgium|Cliniques Universitaires Saint Luc, Brussels, Belgium|Universitair Ziekenhuis Antwerpen, Edegem, Belgium|ATC, CHU Sart Tilman, Liège, Belgium|Hôpital A. Mignot, Le Chesnay, France|Centre Oscar Lambert, Lille, France|Hôpital La Timone, Marseille, France|Institut Curie, Paris, France	"Statistical Analysis Plan", https://ClinicalTrials.gov/ProvidedDocs/13/NCT02774213/SAP_000.pdf|"Study Protocol", https://ClinicalTrials.gov/ProvidedDocs/13/NCT02774213/Prot_001.pdf	https://ClinicalTrials.gov/show/NCT02774213
11	NCT02705157	The OPTIMAL Study - A Prospective Cohort of Patients With Bone Metastases of the Long Bones	OPTIMAL	Unknown status	No Results Available	Bone Metastasis	Procedure: Stabilisation of (impending) pathological fracture|Radiation: Radiotherapy of bone metastasis	Change in quality of life before and after treatment as measured by EQ-5D, EORTC BM-22, and EORTC PAL-15.|Change in pain before and after treatment as measured by an 11-point numeric rating scale (NRS)|Change in function before and after treatment as measured by the Toronto Extremity Salvage Score (TESS).|Proportion of participants with overall survival at 6 months|Proportion of participants with…	Leiden University Medical Center	All	18 Years and older (Adult, Older Adult)		900	Other	Observational	Observational Model: Cohort|Time Perspective: Prospective	NL54439.058.15	2023-01-16	2023-01-18	2023-01-21	2016-03-10		2016-09-19	Leiden University Medical Center, Leiden, Netherlands		https://ClinicalTrials.gov/show/NCT02705157
12	NCT02163226	A Randomized Trial Evaluating Rapid Delivery of Dose Escalated Hypofractionated Radiotherapy for Patients Diagnosed With Bone Metastases for Effective Palliation of Symptoms		Completed	Has Results	Bone Metastases	Radiation: Hypofractionated Radiation Treatment|Radiation: One Radiation Treatment|Behavioral: Questionnaire	Number of Intent- to- Treat Patients With Pain Response by Treatment|Number of Evaluable Participants With Pain Response by Treatment|Number of Participants With Toxicity Associated With Treatment	M.D. Anderson Cancer Center	All	18 Years and older (Adult, Older Adult)	Phase 2|Phase 3	167	Other	Interventional	Allocation: Randomized|Intervention Model: Parallel Assignment|Masking: None (Open Label)|Primary Purpose: Treatment	2013-0640|NCI-2014-01482	2014-08-06	2020-09-02	2020-09-02	2014-06-13	2021-11-08	2021-11-08	Banner MD Anderson Cancer Center, Gilbert, Arizona, United States|MD Anderson Cancer Center at Cooper, Voorhees, New Jersey, United States|University of Texas MD Anderson Cancer Center, Houston, Texas, United States	"Study Protocol and Statistical Analysis Plan", https://ClinicalTrials.gov/ProvidedDocs/26/NCT02163226/Prot_SAP_000.pdf	https://ClinicalTrials.gov/show/NCT02163226
13	NCT05524064	FLASH Radiotherapy for the Treatment of Symptomatic Bone Metastases in the Thorax	FAST-02	Not yet recruiting	No Results Available	Bone Metastases in the Thorax	Radiation: FLASH Radiotherapy	Assessment of radiation-related toxicities that are possibly, probably, or definitely related to FLASH radiotherapy.|Assessment of pain relief using patient reported pain questionnaire for overall pain score|Assessment of pain relief using patient reported pain questionnaire for pain at treated site|Use of pain medication|Workflow feasibility - time on table|Workflow feasibility - delays in study…	Varian, a Siemens Healthineers Company	All	18 Years and older (Adult, Older Adult)	Not Applicable	10	Industry	Interventional	Allocation: N/A|Intervention Model: Single Group Assignment|Masking: None (Open Label)|Primary Purpose: Treatment	VAR-2022-03	2022-10-01	April 1, 2025	April 1, 2025	2022-09-01		2022-09-01	Cincinnati Children's Hospital Medical Center, Cincinnati, Ohio, United States		https://ClinicalTrials.gov/show/NCT05524064
14	NCT02876991	Evaluation of Sodium Fluoride PET in the Identification of Bone Metastases in Patients Having Undergone a Choline PET for Occult Recurrence of Prostatic Adenocarcinoma	FNa-CHOLINE	Unknown status	No Results Available	Bone Metastasis	Procedure: Sodium fluoride PET	Percentage of patients with choline PET negative and sodium fluoride PET positive for bone extension (metastasis)|Inter-strategy concordance of diagnosis evaluated by kappa coefficient|Metastatic status and number of lesions detected respectively by sodium fluoride PET and choline PET|Metastatic status and number of lesions identified by 3 medical doctors of 2 different centres in sodium fluoride…	Central Hospital, Nancy, France	Male	18 Years and older (Adult, Older Adult)	Not Applicable	110	Other	Interventional	Allocation: N/A|Intervention Model: Single Group Assignment|Masking: None (Open Label)|Primary Purpose: Diagnostic	2015-A00021-48	2023-02-16	2023-08-18	2023-02-19	2016-08-24		2016-08-24	Service de Médecine Nucléaire CHRU de Nancy-Brabois, Vand?uvre-lès-Nancy, France		https://ClinicalTrials.gov/show/NCT02876991
15	NCT02376322	Hypofractionated Radiotherapy (16/2) for the Palliation of Complicated Bone Metastases in Patients With KPS		Completed	No Results Available	Bone Metastases	Radiation: Radiotherapy	Overall pain response at the site of treatment, which will be measured at two months post-treatment. Pain response will be measured using the International Consensus on Palliative Radiotherapy Endpoints Pain Response Categories.|Quality of life as assessed by the EORTC QLQ PAL-15 and EORTC QLQ-BM22|Side effects of Radiotherapy.	Santa Casa de Porto Alegre	All	18 Years and older (Adult, Older Adult)	Phase 2	50	Other	Interventional	Allocation: N/A|Intervention Model: Single Group Assignment|Masking: None (Open Label)|Primary Purpose: Treatment	ISCMPA01	2023-07-14	2016-07-30	2016-07-30	2015-03-03		2017-10-06	ISCMPA, Porto Alegre, RS, Brazil|ICESP, São Paulo, SP, Brazil|Sunnybrook Health Sciences Centre, Toronto, Ontario, Canada|S. Maria Hospital, Terni, Italy		https://ClinicalTrials.gov/show/NCT02376322
16	NCT01765907	Antalgic Treatment of Painful Bone Metastases by US-guided High Intensity Focused Ultrasound (HIFU)		Completed	No Results Available	Bone Metastasis	Device: HIFU	To assess safety including adverse and serious adverse events, local and systemic tolerance of HIFU in patients with bone metastasis acoording to the Common Terminology Criteria for Adverse events (CTCAE version 4.3)	Theraclion	All	18 Years and older (Adult, Older Adult)	Phase 1	3	Industry	Interventional	Allocation: N/A|Intervention Model: Single Group Assignment|Masking: None (Open Label)|Primary Purpose: Supportive Care	HIFU/F/BM/Feb2012.	2023-12-12	2023-03-14	2023-03-14	2013-01-10		April 16, 2014	Institut Gustave Roussy, Villejuif, France		https://ClinicalTrials.gov/show/NCT01765907
17	NCT01470105	Improving a Bayesian Model's Survival Estimates in Patients Needing Surgery for Bone Metastases		Active, not recruiting	No Results Available	Bone Metastases	Other: blood sampling, the SF-36 questionnaire	serum inflammatory cytokines|chemokine analysis|patient-reported SF-36 data	Memorial Sloan Kettering Cancer Center|Montefiore Medical Center	All	18 Years and older (Adult, Older Adult)		230	Other	Observational	Observational Model: Cohort|Time Perspective: Prospective	11-121	2023-11-11	2023-11-22	2023-11-22	2011-11-11		2021-12-02	Montefiore Medical Center, Bronx, New York, United States|Memorial Sloan Kettering Cancer Center, New York, New York, United States		https://ClinicalTrials.gov/show/NCT01470105
18	NCT01429493	Biological Image Guided Antalgic Stereotactic Body Radiotherapy of Bone Metastases		Unknown status	No Results Available	Bone Metastases	Radiation: Conventional Radiotherapy|Radiation: Biological image-guided radiotherapy with conventional dose.|Radiation: Biological image-guided SBRT with dose-escalation.	Level of pain response 1 month after radiotherapy|Quality of life 1 month after radiotherapy.	University Hospital, Ghent	All	18 Years and older (Adult, Older Adult)	Phase 2|Phase 3	120	Other	Interventional	Allocation: Randomized|Intervention Model: Single Group Assignment|Masking: Single (Participant)|Primary Purpose: Treatment	2011/541	2023-02-13	2023-12-15	2023-12-15	2011-09-07		2015-06-03	University Hospital Antwerp, Antwerp, Belgium|Ghent University Hospital, Ghent, Belgium		https://ClinicalTrials.gov/show/NCT01429493
19	NCT04141306	Radioiodine-avid Bone Metastases From Thyroid Cancer Without Structural Abnormality		Unknown status	No Results Available	Bone Metastases|Thyroid Cancer	Other: Administrative data|Other: Clinical data|Other: Histological data|Other: Imaging data|Other: Biological data|Other: Further treatment	Rate of complete remission of thyroid cancer	Hospices Civils de Lyon	All	18 Years to 80 Years (Adult, Older Adult)		30	Other	Observational	Observational Model: Cohort|Time Perspective: Retrospective	69HCL19_1919	2023-11-19	2023-12-19	2023-12-19	2019-10-28		2019-10-28			https://ClinicalTrials.gov/show/NCT04141306
20	NCT00321620	Study of Denosumab vs. Zoledronic Acid to Treat Bone Metastases in Men With Hormone-refractory Prostate Cancer		Completed	Has Results	Bone Metastases	Drug: zoledronic acid|Biological: denosumab	Time to the First On-Study SRE (Non-inferiority)|Time to the First On-Study SRE (Superiority)|Time to the First-And-Subsequent On-Study SRE	Amgen	Male	18 Years and older (Adult, Older Adult)	Phase 3	1904	Industry	Interventional	Allocation: Randomized|Intervention Model: Parallel Assignment|Masking: Quadruple (Participant, Care Provider, Investigator, Outcomes Assessor)|Primary Purpose: Supportive Care	20050103	April 1, 2006	2009-10-01	2012-02-24	2006-05-04	2014-03-21	2018-08-29			https://ClinicalTrials.gov/show/NCT00321620
21	NCT01248585	Dexamethasone vs Placebo in the Prophylaxis of Radiation-Induced Pain Flare Following Palliative Radiotherapy for Bone Metastases		Completed	Has Results	Bone Metastases	Drug: Dexamethasone|Drug: Placebo	Radiation-induced Pain Flare Incidence|Radiation-induced Pain Flare Incidence From Day 6 to Day 10 After Radiotherapy Treatment|Analgesic Use|Response to Radiation Treatment at Six Weeks|Change in Pain Intensity Score Over 10 Days After Radiotherapy.	NCIC Clinical Trials Group|Canadian Cancer Trials Group	All	18 Years and older (Adult, Older Adult)	Phase 3	298	Other	Interventional	Allocation: Randomized|Intervention Model: Parallel Assignment|Masking: Double (Participant, Investigator)|Primary Purpose: Treatment	SC23	2010-11-22	2015-05-25	2015-11-27	2010-11-25	2020-10-22	2020-10-22	Tom Baker Cancer Centre, Calgary, Alberta, Canada|Cross Cancer Institute, Edmonton, Alberta, Canada|BCCA - Abbotsford Centre, Abbotsford, British Columbia, Canada|BCCA - Vancouver Cancer Centre, Vancouver, British Columbia, Canada|BCCA - Vancouver Island Cancer Centre, Victoria, British Columbia, Canada|CancerCare Manitoba, Winnipeg, Manitoba, Canada|The Vitalite Health Network - Dr. Leon Richard…		https://ClinicalTrials.gov/show/NCT01248585
22	NCT00321464	A Study Comparing Denosumab vs. Zoledronic Acid for the Treatment of Bone Metastases in Breast Cancer Subjects.		Completed	Has Results	Bone Metastases	Biological: Denosumab|Drug: Zoledronic Acid	Time to First On-Study Skeletal Related Event (SRE) (Non-inferiority)|Time to First On-Study Skeletal-Related Event (Superiority)|Time to First and Subsequent On-Study Skeletal-Related Event	Amgen|Daiichi Sankyo, Inc.	All	18 Years and older (Adult, Older Adult)	Phase 3	2049	Industry	Interventional	Allocation: Randomized|Intervention Model: Parallel Assignment|Masking: Triple (Participant, Care Provider, Investigator)|Primary Purpose: Supportive Care	20050136	April 1, 2006	2009-07-20	April 4, 2012	2006-05-03	2014-03-10	2018-10-17			https://ClinicalTrials.gov/show/NCT00321464
23	NCT04859569	Efficacy and Safety of LY01011 and Xgeva® in Patients With Bone Metastases From Solid Tumors		Recruiting	No Results Available	Bone Metastases From Solid Tumors	Drug: LY01011|Drug: Xgeva®	Natural logarithm change from baseline to week 13 in uNTx/uCr|The time to first on-study skeletal-related event(SRE)|Incidence of SRE|Percent change in bone specific alkaline phosphatase (s-BALP) from baseline to weeks 13, 25, and 53.|Natural logarithm change in bone turnover marker-uNTx/uCr from baseline to weeks 25 and 53.	Luye Pharma Group Ltd.	All	18 Years to 80 Years (Adult, Older Adult)	Phase 3	850	Industry	Interventional	Allocation: Randomized|Intervention Model: Parallel Assignment|Masking: Quadruple (Participant, Care Provider, Investigator, Outcomes Assessor)|Primary Purpose: Treatment	LY01011/CT-CHN-303	April 30, 2021	2022-12-31	2023-06-30	April 26, 2021		2021-06-07	The First Affiliated Hospital of Guangdong Pharmaceutical University, Guangzhou, China		https://ClinicalTrials.gov/show/NCT04859569
24	NCT00330759	Study of Denosumab vs. Zoledronic Acid to Treat Bone Metastases in Subjects With Advanced Cancer or Multiple Myeloma.		Completed	Has Results	Bone Metastases	Biological: Denosumab|Drug: Zoledronic Acid	Time to the First On-Study Skeletal-Related Event (Non-Inferiority)|Time to First On-Study Skeletal-Related Event (Superiority)|Time to the First-and-Subsequent On-Study Skeletal-Related Event	Amgen	All	18 Years and older (Adult, Older Adult)	Phase 3	1779	Industry	Interventional	Allocation: Randomized|Intervention Model: Parallel Assignment|Masking: Double (Participant, Investigator)|Primary Purpose: Supportive Care	20050244	2006-06-01	April 1, 2009	2011-10-01	2006-05-29	April 9, 2014	2018-08-31			https://ClinicalTrials.gov/show/NCT00330759
25	NCT00824213	Pilot Project: Fast Whole-body Spect Scanning to Improve the Detection of Bone Metastases in Patients With Diagnosed Cancer		Completed	No Results Available	Bone Metastases			University of British Columbia	All	Child, Adult, Older Adult		50	Other	Observational	Observational Model: Case-Only|Time Perspective: Prospective	H08-01640	2023-01-09	2016-08-10	2016-08-10	2009-01-16		2017-03-03	Lions Gate Hospital, North Vancouver, British Columbia, Canada|British Columbia Cancer Agency, Vancouver, British Columbia, Canada|Vancouver Coastal Health Research Institute, Vancouver, British Columbia, Canada		https://ClinicalTrials.gov/show/NCT00824213
26	NCT00503178	Biological Imaging Guided Antalgic Radiotherapy of Bone Metastases (Phase II Trial)		Unknown status	No Results Available	Bone Metastases	Procedure: Biological imaging guided antalgic radiotherapy	Pain assessment|Acute toxicity|Bone remodeling|Resulting volumes of the targets and functional active areas|Mismatch and/or overlap areas	University Hospital, Ghent	All	21 Years and older (Adult, Older Adult)	Phase 2	20	Other	Interventional	Allocation: Non-Randomized|Intervention Model: Single Group Assignment|Masking: None (Open Label)|Primary Purpose: Treatment	2006/098	April 2006	2023-07-15	2023-07-15	2007-07-18		2014-12-05	University Hospital Ghent, Ghent, Belgium		https://ClinicalTrials.gov/show/NCT00503178
27	NCT04630522	Efficacy and Safety of JMT103 in Patients With Bone Metastases From Solid Tumors		Recruiting	No Results Available	Bone Metastases From Solid Tumors	Drug: Drug: JMT103- 120 mg SC Q4W|Drug: Drug: JMT103- 120 mg SC Q8W|Drug: Drug: JMT103- 180 mg SC Q8W|Dietary Supplement: Dietary Supplement: Calcium Dietary Supplement: Vitamin D	Percentage change of urinary N-terminal telopeptide of type 1 collagen/creatine (U-NTX/Cr) from baseline to week 13|Incidence and type of adverse events (AEs)|Incidence of Skeletal-related event(SRE)|Change in Pain Score (Brief Pain Inventory-Short Form	BPI-SF)|Trough plasma concentration (Ctrough)|Percentage change in serum C-terminus peptide (of Type 1 Collagen) from baseline|Percentage change in serum bone-specific alkaline phosphatase (bALP) from baseline|Number of patients with anti-JMT103 antibodies	Shanghai JMT-Bio Inc.	All	18 Years and older (Adult, Older Adult)	Phase 1	150	Industry	Interventional	Allocation: Randomized|Intervention Model: Parallel Assignment|Masking: None (Open Label)|Primary Purpose: Treatment	JMT103CN01-1	2020-10-31	2021-12-31	2022-05-31	2020-11-16		2020-11-16	Shanghai East Hospital, Shanghai, Shanghai, China		https://ClinicalTrials.gov/show/NCT04630522
28	NCT04167605	Evaluation of Prognostic Factors: From Breast Cancer to Bone Metastases	BC-BOMET	Recruiting	No Results Available	Breast Cancer Metastatic|Bone Metastases	Other: Bone metastasis|Other: Breast cancer metastatic to bone	SENP1 expression|Identification of new predictive molecular markers of breast cancer progression towards an aggressive metastatic state.	Istituto Ortopedico Galeazzi	Female	18 Years and older (Adult, Older Adult)		30	Other	Observational	Observational Model: Case-Control|Time Perspective: Cross-Sectional	BC-BOMET	2020-01-13	2022-11-12	2024-11-12	2019-11-19		2022-07-12	IRCCS Istituto Ortopedico Galeazzi, Milan, Italy		https://ClinicalTrials.gov/show/NCT04167605
29	NCT02839291	Evaluation of Medical Practice in the Management of Bone Metastases After Injectable Bone Antiresorptive Treatment, and Its Influence on Quality of Life	PRISM	Recruiting	No Results Available	Tumor With Bone Metastasis	Other: quality of life questionaries|Drug: intravenous or oral bone antiresorptive treatments	evaluation of 4 targeted dimensions of the EORTC-QLQ-BM22 quality of life questionarie	Centre Hospitalier Universitaire de Besancon	All	18 Years and older (Adult, Older Adult)	Not Applicable	154	Other	Interventional	Allocation: N/A|Intervention Model: Single Group Assignment|Masking: None (Open Label)|Primary Purpose: Other	P/2015/279	2023-05-16	2023-05-23	2023-05-25	2016-07-20		2022-05-11	Centre Hospitalier Régional Universitaire de Besançon, Besançon, France|Hôpital Nord Franche-Comté, Montbéliard, France		https://ClinicalTrials.gov/show/NCT02839291
30	NCT00858741	Palliative Radiotherapy for Bone Metastases: Single Versus Multiple Fractions.		Completed	No Results Available	Bone Metastases|Pain	Radiation: single fraction|Radiation: multiple fractions	Pain relief|duration of pain relief, narcotic relief, toxicity and the effect on quality of life measures for each of the two treatment arms.	Marilia Medicine School	All	18 Years and older (Adult, Older Adult)	Phase 3	148	Other	Interventional	Allocation: Randomized|Intervention Model: Parallel Assignment|Masking: None (Open Label)|Primary Purpose: Treatment	FAMEMA - BONE METASTASES				2009-03-10		2009-03-10	Radiation Oncology Department at Marilia Medicine school, Marilia, Sao Paulo, Brazil		https://ClinicalTrials.gov/show/NCT00858741
31	NCT02969564	18F-NaF-PET/MR vs 99mTc-MDP-SPECT/CT to Detect Bone Metastases in Prostate Cancer Patients.		Completed	No Results Available	Bone Metastases|Prostate Cancer	Other: scintigraphy 99mTc-MDP-SPECT/CT.|Other: 18F-NaF-PET/MR	Compare the diagnostic performance of 18F-NaF-PET/MR scanning to that of whole body 99mTc-MDP-SPECT/CT for detecting cancer that has spread to the bone (bone metastasis)|To assess differences in sensitivity and specificity in detecting bone metastases between the two imaging modalities.|To determine the number of equivocal and diagnostic tests resulting from the two imaging modalities.	Valentina Garibotto|University Hospital, Geneva	Male	18 Years and older (Adult, Older Adult)		12	Other	Observational	Observational Model: Case-Only|Time Perspective: Prospective	15-118	2023-05-16	2023-05-18	2020-09-14	2016-11-21		2020-11-04	Geneva University Hospital, Geneva, Switzerland		https://ClinicalTrials.gov/show/NCT02969564
32	NCT00237159	Effect of Zoledronic Acid in Patients With Prostate Cancer and Bone Metastasis		Completed	No Results Available	Prostate Cancer Patients With Bone Metastasis	Drug: Zoledronic acid	Rate of skeletal complications|Time to first skeletal complication|Bone pain|Patients´ satisfaction with treatment|Bone turnover parameters	Novartis Pharmaceuticals|Novartis	Male	18 Years and older (Adult, Older Adult)	Phase 4	284	Industry	Interventional	Allocation: Non-Randomized|Intervention Model: Single Group Assignment|Masking: None (Open Label)|Primary Purpose: Treatment	CZOL446EDE07	2023-10-02	2023-12-05		2005-10-12		2011-03-23			https://ClinicalTrials.gov/show/NCT00237159
33	NCT01106352	A Study of Alpharadin With Docetaxel in Patients With Bone Metastasis From Castration-Resistant Prostate Cancer (CRPC)		Completed	Has Results	Bone Metastases|Castration-Resistant Prostate Cancer	Drug: Radium-223 dichloride (Xofigo, BAY88-8223)|Drug: Docetaxel	Number of Subjects With Dose-Limiting Toxicities - Dose Escalation Part|Number of Subjects With Treatment-Emergent Adverse Events (TEAE), Treatment-Emergent Serious Adverse Events (TESAE) With a CTCAE Grade of 3 or 4|Change From Baseline in Serum Biochemistry (Albumin, Protein, Hemoglobin) During the Treatment Period|Change From Baseline in Serum Biochemistry (Alkaline Phosphatase [AP], Alanine A…	Bayer	Male	18 Years and older (Adult, Older Adult)	Phase 1|Phase 2	70	Industry	Interventional	Allocation: Randomized|Intervention Model: Parallel Assignment|Masking: None (Open Label)|Primary Purpose: Treatment	15469|BC1-10|2011-000822-31	2023-07-10	2023-06-15	2023-06-15	April 19, 2010	2016-11-09	2017-01-04	San Francisco, California, United States|Evanston, Illinois, United States|Baltimore, Maryland, United States|Boston, Massachusetts, United States|New York, New York, United States|Seattle, Washington, United States|Villejuif Cedex, France		https://ClinicalTrials.gov/show/NCT01106352
34	NCT01254929	F-18 PET Bone Scans Versus Tc-99m Bone Scans for the Diagnosis of Bone Metastases		Completed	No Results Available	Cancer|Bone Metastases	Device: F-18 PET bone scan|Device: Tc-99m bone scan	Accurate identification of bone metastases|Change in clinical management|Determine if F-18 PET bone scans lead to fewer follow-up imaging studies.|Quantify any adverse events from either type of scan.|Perform subgroup analyses according to cancer cell type.	Seattle Nuclear Medicine	All	18 Years and older (Adult, Older Adult)		299	Other	Observational	Observational Model: Cohort|Time Perspective: Prospective	CAG00065R	2023-12-10	2023-02-14	2023-03-20	2010-12-07		2020-03-19	Seattle Nuclear Medicine, Seattle, Washington, United States		https://ClinicalTrials.gov/show/NCT01254929
35	NCT00241111	Assessment of the Efficacy, Tolerability and Pharmaco-economic Impact of Zoledronic Acid Treatment in Prostate Cancer With Bone Metastasis		Completed	No Results Available	Prostate Cancer With Bone Metastasis	Drug: zoledronic acid	to assess the effectiveness of Zol in prevention of SREs in stratified groups (hormonal treatment)|to assess the effectiveness of Zol in improving pain and QoL in prostate cancer patients with bone metastases|to assess the safety of ZOL treatment|to assess resources consumption|to assess BM	Novartis Pharmaceuticals|Novartis	Male	18 Years and older (Adult, Older Adult)	Phase 4	148	Industry	Interventional	Allocation: Non-Randomized|Intervention Model: Single Group Assignment|Masking: None (Open Label)|Primary Purpose: Treatment	CZOL446EFR04	2023-09-03	2023-01-06		2005-10-18		2017-03-06			https://ClinicalTrials.gov/show/NCT00241111
36	NCT05480189	Effect of Zoledronic Acid Treatment on Bone-related Events in Breast Cancer Patients With Bone Metastases: a Prospective, Multicenter, Real-world Study		Not yet recruiting	No Results Available	Histologically Confirmed Breast Cancer ,Diagnosis of Bone Metastasis	Other: Non-intervention	SREs|time to first on-study SRE	Zhejiang Cancer Hospital	All	18 Years and older (Adult, Older Adult)		1000	Other	Observational	Observational Model: Other|Time Perspective: Prospective	IRB-2022-166	2022-08-30	2023-08-30	2027-03-31	2022-07-29		2022-07-29			https://ClinicalTrials.gov/show/NCT05480189
37	NCT02832765	Intensity-modulated Radiotherapy With Integrated-boost in Patients With Spinal Bone Metastases	IRON-2	Unknown status	No Results Available	Vertebral Bony Metastases	Radiation: A|Radiation: B|Radiation: C|Radiation: D	local control|progression-free survival (PFS)|pain reduction|Quality of life|Fatigue	Heidelberg University	All	18 Years to 80 Years (Adult, Older Adult)	Phase 2	120	Other	Interventional	Allocation: Randomized|Intervention Model: Factorial Assignment|Masking: None (Open Label)|Primary Purpose: Treatment	IRON-2	2023-09-16	2023-02-18	2023-02-18	2016-07-14		2016-07-14	Dept of Radiation Oncology, University of Heidelberg, Germany, Heidelberg, Germany		https://ClinicalTrials.gov/show/NCT02832765
38	NCT02426697	Pain Management With Pecfent in the Prevention of Pain Induced by Position in Radiotherapy	PARABONE	Unknown status	No Results Available	Bone Metastasis	Drug: fentanyl transmucosal|Drug: Placebo	Drug efficacy|Patient global satisfaction|Adverse event of Pecfent|Rescue medication|Radiotherapy session duration	Centre Henri Becquerel	All	18 Years and older (Adult, Older Adult)	Phase 3	120	Other	Interventional	Allocation: Randomized|Intervention Model: Parallel Assignment|Masking: Triple (Participant, Care Provider, Investigator)|Primary Purpose: Treatment	CHB14.03	2023-05-15	2023-12-18	2023-06-19	April 27, 2015		2018-07-23	Centre Henri Becquerel, Rouen, France		https://ClinicalTrials.gov/show/NCT02426697
39	NCT04720391	Bone Metastases in neurOendocrine NEoplasms: naTural History, Prognostic Impact and Therapeutic Approach (MONET)	MONET	Recruiting	No Results Available	Bone Metastases|Neuroendocrine Neoplasm		Overall survival|Influence of skeletal related events (SRE) on survival|Correlation between SRE and time from bone metastasis and SRE, site of one metastases, number of bone metastases, morphology of bone metastases, LDH|Influence of the use of bisphosphonates or RANK-ligands|Correlation from bone metastases and age, gender, primary site, Ki-67, grade of differentiation|Natural history (time betw…	European Institute of Oncology	All	Child, Adult, Older Adult		500	Other	Observational	Observational Model: Cohort|Time Perspective: Other	IEO 1436	2021-01-08	2021-12-31	2021-12-31	2021-01-22		2021-01-22	European Institute of Oncology, IEO, IRCCS, Milan, Italy		https://ClinicalTrials.gov/show/NCT04720391
40	NCT00219258	Efficacy and Safety of Zoledronic Acid in Patients With Bone Metastases of Any Solid Tumors or Multiple Myeloma		Completed	No Results Available	Treatment of Bone Metastases	Drug: Zoledronic acid	To compare in a randomized fashion the effect of zoledronate and pamidronate 90 mg on pain relief as assessed by pain score after 1-dose treatment in patients with bone pain induced by any solid tumors with bone metastases or Multiple Myeloma|Changes in bone markers (urinary N-telopeptide/creatinine ratio, urinary C-telopeptide/creatinine ratio).	Novartis	All	18 Years and older (Adult, Older Adult)	Phase 3	240	Industry	Interventional	Allocation: Randomized|Intervention Model: Parallel Assignment|Masking: Double|Primary Purpose: Treatment	CZOL446E2301	2023-07-05			2005-09-22		2009-11-23	Beijing, Beijing, China		https://ClinicalTrials.gov/show/NCT00219258
41	NCT01117246	Pilot Study for Palliation of Pain in Bone Metastases by MR-HIFU		Completed	No Results Available	Secondary Malignant Neoplasm of Bone	Device: High Intensity Focused Ultrasound	Technical efficacy by medication and pain score|Safety of treatment|Safety determined by intended lesions|Treatment size|X-Ray treatment size measurements|Length of Hospital Stay|Quality of Life	Philips Healthcare	All	18 Years to 80 Years (Adult, Older Adult)	Phase 1|Phase 2	2	Industry	Interventional	Allocation: N/A|Intervention Model: Single Group Assignment|Masking: None (Open Label)|Primary Purpose: Supportive Care	998771A|2010-A00353-36	2023-05-10	2023-07-11	2023-10-11	2010-05-05		2012-02-20	Hôpital St. André, Bordeaux, France		https://ClinicalTrials.gov/show/NCT01117246
42	NCT02688686	Safety and Efficacy of DC-CIK in Patients With Advanced Non-Small-Cell Lung Cancer With Bone Metastases		Unknown status	No Results Available	Non-Small-Cell Lung Cancer With Bone Metastases	Biological: genetically modified dendritic cells cytokine-induced killer	objective response rate (CR) as measured by RECIST criteria|number of participants with adverse events	Affiliated Hospital to Academy of Military Medical Sciences	All	18 Years to 70 Years (Adult, Older Adult)	Phase 1|Phase 2	30	Other	Interventional	Allocation: N/A|Intervention Model: Single Group Assignment|Masking: None (Open Label)|Primary Purpose: Treatment	307-CTC-DC/CIK-NSCLC-001	2023-02-16	2023-02-18		2016-02-23		2016-02-23	Affiliated Hospital to Academy of Military Medical Sciences, Beijing, Beijing, China		https://ClinicalTrials.gov/show/NCT02688686
43	NCT01669499	Dexamethasone for Pain Flare After Radiotherapy of Painful Bone metastasesZonMW 11510009		Completed	No Results Available	Bone Metastases	Drug: Dexamethasone acetate|Drug: Placebo	The occurrence of a pain flare.|Pain scores|Quality of life|Side effects	UMC Utrecht|ZonMw: The Netherlands Organisation for Health Research and Development	All	18 Years and older (Adult, Older Adult)	Phase 3	411	Other	Interventional	Allocation: Randomized|Intervention Model: Parallel Assignment|Masking: Triple (Participant, Care Provider, Investigator)|Primary Purpose: Supportive Care	ZonMW 11510009	2023-01-12	April 2016	April 2016	2012-08-21		2016-11-16	Leiden University Medical Centre, Leiden, Zuid-Holland, Netherlands|University Medical Center Utrecht, Utrecht, Netherlands		https://ClinicalTrials.gov/show/NCT01669499
44	NCT00610272	Optimization of Radiotherapy in Treatment of Painful Bone Metastasis	bone mets	Completed	No Results Available	Pain|Bone Metastasis	Radiation: Radiotherapy	Pain Relief (response rate) at 4 weeks|Onset and Duration of Pain Relief in Responders|Toxicity|Quality of Life|Rates of Pathological Fractures and Spinal Cord Compression	International Atomic Energy Agency	All	18 Years and older (Adult, Older Adult)	Phase 3	650	Other	Interventional	Allocation: Randomized|Intervention Model: Parallel Assignment|Masking: None (Open Label)|Primary Purpose: Treatment	E33028	2023-01-08	April 2012	2023-08-12	2008-02-07		2013-08-07	Centre Pierre et Marie Curie, Centre hospitalier universitaire Mustapha (CHU), Alger, Algeria|Irmandade de Santa Casa de Misericordia de Porto Alegre, Porto Alegre, Brazil|Misr Oncology Center (MOC), Cairo, Egypt|Tata Memorial Hospital, Mumbai, India|Institute of Oncology, University of Vilinius, Vilnius, Lithuania|Institute of Radiotherapy and Oncology, Skopje, Macedonia, The Former Yugoslav Rep…		https://ClinicalTrials.gov/show/NCT00610272
45	NCT01833806	A Phase IV Post Approval Clinical Study of ExAblate Treatment of Metastatic Bone Tumors for the Palliation of Pain		Completed	No Results Available	Bone Metastasis	Device: ExAblate MRgFUS	Proportion of Responders|Safety Profile	InSightec	All	18 Years and older (Adult, Older Adult)	Not Applicable	31	Industry	Interventional	Allocation: N/A|Intervention Model: Single Group Assignment|Masking: None (Open Label)|Primary Purpose: Supportive Care	BM018|P110039/S2	2023-09-13	2022-01-14	2022-01-14	April 17, 2013		2022-01-31	City of Hope, Duarte, California, United States|University of California Los Angeles, Los Angeles, California, United States|University of California San Francisco, San Francisco, California, United States|Stanford University School of Medicine, Stanford, California, United States|Mayo Clinic, Rochester, Minnesota, United States|Weill Cornell Medical Center, New York, New York, United States|Fox …		https://ClinicalTrials.gov/show/NCT01833806
46	NCT03188926	Surgical Treatment of Long Bone Metastases	MTC	Completed	No Results Available	Bone Metastases|Surgery	Procedure: intramedullary fixation or endoprosthetic reconstruction	Clinical outcomes after treatment of long bone metastases with intramedullary nail versus endoprosthetic reconstruction|Survival in patients undergoing surgery for metastatic bone disease	Istituto Ortopedico Rizzoli	All	Child, Adult, Older Adult		120	Other	Observational	Observational Model: Case-Only|Time Perspective: Prospective	26106	2016-01-04	2017-12-31	2020-01-31	2017-06-16		2020-08-04	Istituto Ortopedico Rizzoli, Bologna, Italy		https://ClinicalTrials.gov/show/NCT03188926
47	NCT05466812	Efficacy of Sr-89 for Differentiated Thyroid Cancer With Bone Metastases		Not yet recruiting	No Results Available	Thyroid Neoplasm Follicular|Bone Metastases	Drug: Sr-89	Change of serum thyroglobulin (Tg) level|Change of serum thyroglobulin antibody (TgAb) level|Change of serum calcium level|Change of serum alkaline phosphatase (ALP) level|Change of tumor-background ratio on bone scan|Change of standardized uptake value (SUV) on positron emission tomography/ computed tomography (PET/CT)|Structural change on image|Numerical rating scale (NRS) for pain|Skeletal rel…	Peking Union Medical College Hospital	All	Child, Adult, Older Adult	Phase 4	20	Other	Interventional	Allocation: N/A|Intervention Model: Single Group Assignment|Masking: None (Open Label)|Primary Purpose: Treatment	ZS-3477	2022-07-13	2024-07-13	2025-07-13	2022-07-20		2022-07-20	Peking Union Medical College Hospital, Beijing, China		https://ClinicalTrials.gov/show/NCT05466812
48	NCT04803773	MRI-guided Focused Ultrasound : Feasibility Study for the Treatment of Bone Metastases and osteoïd Osteoma	UFOGUIDE	Recruiting	No Results Available	Painful Bone Metastases|Superficial Osteoid Osteoma	Device: UFOGUIDE "patient transducer"	Device feasibility|Clinical efficacy: - in palliative intent by a decrease =3 on visual analogic scale - in curative intent (osteoid osteoma) by a total disappearance in pain|Quality of life using the EORTC (European Organisation for Research and Treatment of Cancer) quality of life questionnaire|Safety :number of patients with complications and characterization of complications	University Hospital, Strasbourg, France	All	18 Years and older (Adult, Older Adult)	Not Applicable	15	Other	Interventional	Allocation: N/A|Intervention Model: Single Group Assignment|Masking: None (Open Label)|Primary Purpose: Device Feasibility	7677	2021-01-19	2022-01-19	2022-07-19	2021-03-18		2021-03-18	CHU de Strasbourg, Strasbourg, France		https://ClinicalTrials.gov/show/NCT04803773
49	NCT02810262	Association of Bone and Metabolic Parameters With Overall Survival in Patients With Bone Metastases From Adenocarcinoma Lung Cancer (POUMOS)	POUMOS	Unknown status	No Results Available	Bone Metastases|Lung Cancer	Other: Bone metastases biopsy	serum DKK1|serum HbA1C|urinary CTX|hip bone mass (g/cm²)|mutational profile of the bone metastases	Hospices Civils de Lyon	All	18 Years and older (Adult, Older Adult)		200	Other	Observational	Observational Model: Cohort|Time Perspective: Prospective	D50772	2023-06-11	2023-12-19	2023-12-19	2016-06-22		April 2, 2019	Hospices Civils de Lyon - Hôpital Edouard Herriot - Centre des Métastases Osseuses (CEMOS), Lyon, France		https://ClinicalTrials.gov/show/NCT02810262
50	NCT02364115	Randomized Trial Comparing Conventional Radiotherapy With Stereotactic Radiotherapy in Patients With Bone Metastases - VERTICAL Study	VERTICAL	Completed	No Results Available	Spinal Metastases|Bone Metastases	Radiation: Stereotactic Body Radiotherapy	Complete or partial pain response after radiation, defined according to the International Bone Metastases Consensus Endpoints for Clinical Trials.|Health-Related Quality of Life|Progression free survival|Overall survival|Occurrence or progression of vertebral compression fracture (VCF)|Occurrence of radiation-induced myelopathy|Duration of pain relief|Determination of rapidity of pain relief	UMC Utrecht	All	18 Years and older (Adult, Older Adult)	Not Applicable	110	Other	Interventional	Allocation: Randomized|Intervention Model: Parallel Assignment|Masking: None (Open Label)|Primary Purpose: Treatment	NL49316.041.14	2023-01-15	2023-05-19	2023-08-19	2015-02-16		2019-09-26	University Medical Center Utrecht, Utrecht, Netherlands		https://ClinicalTrials.gov/show/NCT02364115
51	NCT04947280	Single Arm Phase II Study of Fractionated Stereotatic Radiation Therapy (FSRT) for Bone Metastases in Breast Cancer		Recruiting	No Results Available	Bone Metastases|Breast Cancer	Radiation: Fractionated Stereotatic Radiation Therapy	Local Control Rate|Pain Control|Overall Survival|Progression Free Survival|Quality of Life|Vertebral Fracture and Radiation Myelitis	Fudan University	All	Child, Adult, Older Adult	Phase 1|Phase 2	120	Other	Interventional	Allocation: N/A|Intervention Model: Single Group Assignment|Masking: None (Open Label)|Primary Purpose: Treatment	FDRT-BC012	2021-01-01	2025-12-31	2026-12-31	2021-07-01		2021-07-01	Fudan University Shanghai Cancer Center, Shanghai, Shanghai, China		https://ClinicalTrials.gov/show/NCT04947280
52	NCT03292536	Merestinib on Bone Metastases in Subjects With Breast Cancer		Terminated	No Results Available	Bone Metastases|Breast Cancer	Drug: Merestinib	Adverse Events that Occur|Change in urinary N-telopeptide level|Absolute and percentage change in serum B-CTX, TRAP-5b, P1NP and BSAP|Time to skeletal-related events|Change in pain scores|Change in pain by narcotic use|Change in bone lesion uptake	University of Utah|Eli Lilly and Company	Female	18 Years and older (Adult, Older Adult)	Phase 1	2	Other|Industry	Interventional	Allocation: N/A|Intervention Model: Single Group Assignment|Masking: None (Open Label)|Primary Purpose: Treatment	HCI103657	2018-01-11	2019-06-24	2019-06-24	2017-09-25		2021-01-08	Huntsman Cancer Institute, Salt Lake City, Utah, United States		https://ClinicalTrials.gov/show/NCT03292536
53	NCT01693770	Primary Pain Palliation in Bone Metastases Treated With Magnetic Resonance-guided Focused Ultrasound		Unknown status	No Results Available	Secondary Malignant Neoplasm of Bone	Procedure: MRgFUS	To evaluate the safety and efficacy of Magnetic Resonance-guided Focused Ultrasound (MRgFUS) for the primary treatment of painful bone metastases|To correlate the treatment response to extent of tumor necrosis as determined by follow-up imaging	University of Roma La Sapienza	All	18 Years to 90 Years (Adult, Older Adult)	Phase 1|Phase 2	18	Other	Interventional	Allocation: N/A|Intervention Model: Single Group Assignment|Masking: None (Open Label)|Primary Purpose: Treatment	BM-MRgFUS	2023-01-11	2023-01-15	2023-02-15	2012-09-26		2014-06-18	Policlinico Umberto I, Rome, Italy		https://ClinicalTrials.gov/show/NCT01693770
54	NCT03979118	Exercise Prescription in Patients With Bone Metastases	Ex-Met	Completed	No Results Available	Advanced Cancer|Bone Metastases		Skeletal Related Events (SRE)|Physical Activity|Brief Pain Inventory (BPI)|European Organisation for Research and Treatment of Cancer (EORTC) Quality of Life Questionnaire - Bone Mestastases 22(QLQ-BM22)|Pittsburgh Sleep Quality Index (PSQI)|Exercise Benefits Barriers Scale (EBBS)	University of Dublin, Trinity College|Irish Cancer Society|St. James's Hospital, Ireland|Tallaght University Hospital|Our Lady's Hospice & Care Services, Harold's Cross	All	18 Years and older (Adult, Older Adult)		58	Other	Observational	Observational Model: Cohort|Time Perspective: Cross-Sectional	PAL17GUI	2019-10-15	April 1, 2021	2022-01-31	2019-06-07		2022-05-18	St. James's Hospital, Dublin, Ireland		https://ClinicalTrials.gov/show/NCT03979118
55	NCT03814811	Circulating Osteocalcin-positive Cells in Breast Cancer Bone Metastasis	COP-BREAST	Unknown status	No Results Available	Breast Neoplasms|Bone Metastases	Diagnostic Test: Circulating Osteocalcin-positive (cOC) cells	Progression of bone metastasis|Diagnosis of new bone metastasis	Seoul National University Hospital|National Cancer Center, Korea	Female	20 Years and older (Adult, Older Adult)		200	Other	Observational	Observational Model: Case-Control|Time Perspective: Cross-Sectional	SNUH-IRB-1706069859	2017-07-01	2017-09-30	2021-12-31	2019-01-24		2019-01-24	Korea University Anam Hospital, Seoul, Korea, Republic of|Seoul National University Hospital, Seoul, Korea, Republic of		https://ClinicalTrials.gov/show/NCT03814811
56	NCT04063254	A Prospective Randomized Trial of High Dose Versus Standard Dose Stereotactic Radiotherapy for Pain Control in Patients With Bone Metastases		Unknown status	No Results Available	Bone Metastases|Radiotherapy Side Effect	Radiation: Stereotactic Radiotherapy	Effects of treatment	National Taiwan University Hospital	All	20 Years and older (Adult, Older Adult)	Phase 2	302	Other	Interventional	Allocation: Randomized|Intervention Model: Parallel Assignment|Masking: Single (Participant)|Primary Purpose: Treatment	201906063RINB	2019-08-30	2021-08-30	2021-08-30	2019-08-21		2019-08-21			https://ClinicalTrials.gov/show/NCT04063254
57	NCT01144481	Risk Factors for Skeletal Related Events in Breast Cancer Patients Receiving Bisphosphonates for Bone Metastases	PROVISTII	Completed	No Results Available	Bone Metastases|Breast Cancer		Skeletal related event	University Health Network, Toronto|AstraZeneca	Female	Child, Adult, Older Adult		60	Other|Industry	Observational	Observational Model: Cohort|Time Perspective: Prospective	PROVISTII	2023-02-09	April 2013	April 2013	2010-06-15		2015-01-07	University Health Network, Toronto, Ontario, Canada		https://ClinicalTrials.gov/show/NCT01144481
58	NCT00981578	ExAblate Conformal Bone System Treatment of Metastatic Bone Tumors for the Palliation of Pain		Terminated	Has Results	Bone Metastases	Device: ExAblate 2100	Number of Adverse Device Effects|Change in NRS Pain Scores From Baseline at 3 Months|Change Brief Pain Inventory - Pain Interference From Baseline at 3 Months	InSightec	All	18 Years and older (Adult, Older Adult)	Not Applicable	37	Industry	Interventional	Allocation: N/A|Intervention Model: Single Group Assignment|Masking: None (Open Label)|Primary Purpose: Treatment	BM010	2023-09-09	2016-11-14	2016-11-14	2009-09-22	2020-03-11	2020-03-11	City of Hope, Duarte, California, United States|University of California San Francisco, San Francisco, California, United States|Stanford University Medical Center, Stanford, California, United States|Methodist Hospital Research Institute, Houston, Texas, United States|University of Virginia, Charlottesville, Virginia, United States		https://ClinicalTrials.gov/show/NCT00981578
59	NCT02847754	Differentiated Resistance Training of the Paravertebral Muscles in Patients With Unstable Spinal Bone Metastasis Under Concomitant Radiotherapy	DISPO-2	Unknown status	No Results Available	Vertebral Bony Metastases	Other: Isometric resistance training	feasibility of isometric exercise in unstable vertebral bony metastases|progression-free survival (PFS)|fracture-free survival (FFS)|bone density|pain reduction|Quality of life|Fatigue	Heidelberg University	All	18 Years to 80 Years (Adult, Older Adult)	Phase 2	60	Other	Interventional	Allocation: Randomized|Intervention Model: Parallel Assignment|Masking: None (Open Label)|Primary Purpose: Treatment	DISPO 2	2023-08-16	2023-01-18	2023-01-20	2016-07-28		2016-07-28	Dept of Radiation Oncology, University of Heidelberg, Germany, Heidelberg, Germany		https://ClinicalTrials.gov/show/NCT02847754
60	NCT00350233	MR Guided Focused Ultrasound Surgery of Metastatic Bone Tumors		Completed	No Results Available	Bone Metastases	Device: ExAblate 2000	Determine safety of MRgFUS of Bone Metastases	InSightec	All	18 Years and older (Adult, Older Adult)	Phase 1	10	Industry	Interventional	Allocation: Non-Randomized|Intervention Model: Single Group Assignment|Masking: None (Open Label)|Primary Purpose: Treatment	BM002	2023-05-06	2023-02-10	2023-02-10	2006-07-10		2012-09-17	University of California at San Diego, LaJolla, California, United States|Toronto General Hospital, Toronto, Ontario, Canada		https://ClinicalTrials.gov/show/NCT00350233
61	NCT03479151	Magnetic Resonance Guided High Intensity Focused Ultrasound (MRgHIFU) for Pain Palliation of Bone Metastases	HIFU-Bone	Withdrawn	No Results Available	Cancer|Bone Metastases	Device: Magnetic Resonance Image-guided High Intensity Focused Ultrasound (MR-HIFU)	Measure the ablated tissue volume indicated by immediate post-treatment Gd-T1W imaging in responders and non-responders.|To report the treatment response rate.|To investigate whether ablated tissue volume indicated by Gd-T1W imaging at Day 30 remains stable at Days 60 and 90.|.To investigate whether intra-procedural PRFS metrics are different in responders and non-responders at Day 30|To investig…	Institute of Cancer Research, United Kingdom|Philips Medical Systems|Cancer Research UK	All	18 Years to 80 Years (Adult, Older Adult)	Not Applicable	0	Other|Industry	Interventional	Allocation: N/A|Intervention Model: Single Group Assignment|Masking: None (Open Label)|Primary Purpose: Treatment	17/LO/1689 CCR 4733	2018-03-16	2021-01-07	2021-01-07	2018-03-27		2021-10-08	The Royal Marsden NHS Foundation Trust, Sutton, Surrey, United Kingdom		https://ClinicalTrials.gov/show/NCT03479151
62	NCT02876731	Comparison of NaF PET-CT and Diffusion MRI in the Diagnosis of Bone Metastases (IMMETAOS)	IMMETAOS	Completed	No Results Available	Cancer|Bone Metastasis	Device: PET-CT|Device: MRI	Evidence of Bone metastasis according to a clinician and imaging practitionners group based on clinical and imaging evolution	Institut Jean-Godinot	All	18 Years and older (Adult, Older Adult)	Not Applicable	13	Other	Interventional	Allocation: N/A|Intervention Model: Single Group Assignment|Masking: None (Open Label)|Primary Purpose: Diagnostic	2012-A00381-42	2023-07-13	2023-06-15	2023-06-15	2016-08-24		2016-08-24			https://ClinicalTrials.gov/show/NCT02876731
63	NCT03924609	Impact of Intensive Follow-up for Bone Metastasis on Characteristics and Prognosis of Chinese Breast Cancer Patients		Completed	No Results Available	Breast Cancer|Bone Metastases	Diagnostic Test: Intensive screening / routine screening	Overall survival|disease-free survival|distant metastasis-free survival	Peking University People's Hospital|Fudan University|Sun Yat-Sen Memorial Hospital of Sun Yat-Sen University|Sun Yat-sen University|Harbin Medical University	Female	18 Years to 70 Years (Adult, Older Adult)		1500	Other	Observational	Observational Model: Cohort|Time Perspective: Retrospective	20160504	2018-03-01	2019-03-31	2019-03-31	April 23, 2019		April 23, 2019	Peking University People's Hospital, Beijing, Beijing, China		https://ClinicalTrials.gov/show/NCT03924609
64	NCT01834937	ExAblate Treatment of Metastatic Bone Tumors for the Palliation of Pain	BM019-Registry	Terminated	No Results Available	Pain Resulting From Bone Metastases	Device: ExAblate MRgFUS (Magnetic Resonance guided Focused Ultrasound Surgery)	Adverse Events	InSightec	All	18 Years and older (Adult, Older Adult)		17	Industry	Observational	Observational Model: Cohort|Time Perspective: Prospective	BM019-Registry	2023-06-13	April 2017	April 2017	April 18, 2013		2018-11-09	City of Hope, Duarte, California, United States|University of California San Francisco, San Francisco, California, United States|Stanford University, Stanford, California, United States|Mayo Clinic, Rochester, Minnesota, United States|Weill Cornell Medical Center, New York, New York, United States|University of Virginia, Charlottesville, Virginia, United States		https://ClinicalTrials.gov/show/NCT01834937
65	NCT02826382	Preliminary Evaluation of Uptake in Bone Metastases and Biodistribution of [68Ga]P15-041		Recruiting	No Results Available	Prostate Cancer|Bone Metastases	Drug: [68Ga]P15-041	Time course of uptake of [68Ga]P15-041 in bone metastases|Time course of whole body distribution of [68Ga]P15-041	Five Eleven Pharma, Inc.	Male	18 Years and older (Adult, Older Adult)	Early Phase 1	30	Industry	Interventional	Allocation: Non-Randomized|Intervention Model: Parallel Assignment|Masking: None (Open Label)|Primary Purpose: Diagnostic	511-0001-A	2016-09-20	2023-12-22	2023-01-23	2016-07-11		2022-05-02	University of Pennsylvania, Philadelphia, Pennsylvania, United States		https://ClinicalTrials.gov/show/NCT02826382
66	NCT02784652	Efficacy of Radiotherapy in Combination With Zoledronic Acid in Bone Metastasis Patients With Gastrointestinal Tumors		Completed	No Results Available	Bone Metastasis|Gastrointestinal Cancer	Drug: Zoledronic acid|Radiation: Radiotherapy	Pain relief rate|skeletal related events (fracture and spinal cord compression)|Overall survival	Severance Hospital	All	20 Years and older (Adult, Older Adult)	Phase 2	60	Other	Interventional	Allocation: N/A|Intervention Model: Single Group Assignment|Masking: None (Open Label)|Primary Purpose: Treatment	4-2014-0440	2023-06-14	2017-02-28	2017-02-28	2016-05-27		2017-03-29	Severance hospital, Seoul, Korea, Republic of		https://ClinicalTrials.gov/show/NCT02784652
67	NCT03669523	Denosumab and Nivolumab Combination as 2d-line Therapy in Stage IV NSC Lung Cancer With Bone Metastases (DENIVOS)	DENIVOS	Active, not recruiting	No Results Available	Carcinoma, Non-Small-Cell Lung|Bone Metastases	Drug: Denosumab-nivolumab combination	Overall Response Rate (ORR) according to the PD-L1-expression rate (threshold set at 1%)|Disease-control rate (DCR)|Overall survival|Progression-free survival|Overall Response Rate for the entire population|Overall Response Rate according to the histological type (adenocarcinoma versus squamous cell)|Time to the first Skeletal-Related Event in months|Incidence of adverse events, serious adverse e…	Centre Hospitalier Annecy Genevois|French Lung Cancer Group	All	18 Years and older (Adult, Older Adult)	Phase 2	82	Other	Interventional	Allocation: N/A|Intervention Model: Single Group Assignment|Masking: None (Open Label)|Primary Purpose: Treatment	P_2017_007|2018-001105-85	2018-11-06	2023-12-31	2024-12-31	2018-09-13		2022-07-20	CH du Pays d'Aix, Aix-en-Provence, France|Chu Angers, Angers, France|Centre Hospitalier de Beauvais, Beauvais, France|Centre Hospitalier Fleyriat, Bourg-en-Bresse, France|CHU Morvan - Institut de Cancérologie et d'Hématologie, Brest, France|CH Intercommunal, Créteil, France|Ch Intercommunal Elbeuf Louvier Val de Reuil, Elbeuf, France|CH Intercommunal des Alpes du Sud, Gap, France|Hôpital Robert B…		https://ClinicalTrials.gov/show/NCT03669523
68	NCT00192777	Concurrent Xeloda and Radiotherapy for Bone Metastases		Unknown status	No Results Available	Solid Tumors|Bone Metastases	Drug: Xeloda|Procedure: External Beam Radiotherapy	The frequency of pain relief for the proposed regimen, using a scale that takes into account the subjective feeling and the use of analgesics|The duration of pain relief and narcotic relief for the proposed regimen after one year|The frequency of narcotic relief for the proposed regimen after one year|The toxicity of concurrent UFT and radiotherapy in patients with bone metastases after one year	Rambam Health Care Campus	All	18 Years and older (Adult, Older Adult)	Phase 2	20	Other	Interventional	Allocation: Non-Randomized|Intervention Model: Single Group Assignment|Masking: None (Open Label)|Primary Purpose: Treatment	BM-RT-Xeloda.CTIL	2023-11-04			2005-09-19		2007-10-08	Rambam Health Care Campus, Haifa, Israel		https://ClinicalTrials.gov/show/NCT00192777
69	NCT00757757	A Phase I/II Open-label Study of MCS110 in Patients With Prostate Cancer and Bone Metastases		Terminated	No Results Available	Prostate Cancer|Bone Metastases	Drug: MCS110	Frequency and characteristics of treatment related dose-limiting-toxicities in dose escalation phase|Type and frequency of adverse drug reactions and serious adverse drug reactions|Change in markers of bone resorption and formation (pre- vs. post-treatment)	Novartis Pharmaceuticals|Novartis	Male	18 Years and older (Adult, Older Adult)	Phase 1|Phase 2	3	Industry	Interventional	Allocation: N/A|Intervention Model: Single Group Assignment|Masking: None (Open Label)|Primary Purpose: Treatment	CMCS110A2101	2023-09-08	2023-08-09	2023-08-09	2008-09-23		2020-12-19	NV Cancer Institute, Las Vegas, Nevada, United States|CTRC, San Antonio, Texas, United States		https://ClinicalTrials.gov/show/NCT00757757
70	NCT00524849	Zometa and Circulating Vascular Endothelial Growth Factor (VEGF) in Breast Cancer Patients With Bone Metastasis		Completed	No Results Available	Metastatic Breast Cancer|Bone Metastases	Biological: Zoledronic acid|Drug: Zoledronic acid	Circulating VEGF levels in breast cancer patients with bone metastases|Time to first skeletal-related event|Time to bone progression disease|Progression-free survival|Overall survival	Fudan University|Novartis	Female	18 Years to 75 Years (Adult, Older Adult)	Phase 2|Phase 3	60	Other|Industry	Interventional	Allocation: Randomized|Intervention Model: Parallel Assignment|Masking: None (Open Label)|Primary Purpose: Treatment	CZOL446ECN05	2023-11-06	2023-08-08	2023-01-10	2007-09-05		2010-09-14	Fudan University Cancer Hospital, Shanghai, Shanghai, China		https://ClinicalTrials.gov/show/NCT00524849
71	NCT00566618	Dasatinib in Combination With Zoledronic Acid for the Treatment of Breast Cancer With Bone Metastasis		Completed	Has Results	Breast Cancer|Bone Metastases	Drug: Dasatinib|Drug: Zoledronic Acid	Objective Response in Bone From Time of Initiation of Therapy to > 6 Months|Phase I - Maximum Tolerated Dose (MTD) and Recommended Phase II Dose (RP2D) for Dasatinib in Combination With Zoledronic Acid	M.D. Anderson Cancer Center|Bristol-Myers Squibb	All	18 Years and older (Adult, Older Adult)	Phase 1|Phase 2	31	Other|Industry	Interventional	Allocation: N/A|Intervention Model: Sequential Assignment|Masking: None (Open Label)|Primary Purpose: Treatment	2006-0900|NCI-2015-01920	2007-11-01	2020-11-17	2020-11-17	2007-12-03	2022-02-25	2022-02-25	University of Chicago, Chicago, Illinois, United States|Duke University, Durham, North Carolina, United States|University of Texas MD Anderson Cancer Center, Houston, Texas, United States	"Study Protocol and Statistical Analysis Plan", https://ClinicalTrials.gov/ProvidedDocs/18/NCT00566618/Prot_SAP_000.pdf	https://ClinicalTrials.gov/show/NCT00566618
72	NCT02609828	Phase 3 Study on the Efficacy and Safety of Tanezumab in Patients With Cancer Pain Due to Bone Metastasis Who Are Taking Background Opioid Therapy		Completed	No Results Available	Bone Metastasis|Cancer Pain	Drug: Tanezumab	Change from baseline in daily average pain intensity in index bone metastasis cancer pain site|Change from baseline in daily worst pain intensity in index bone metastasis cancer pain site|Change from baseline in weekly average pain intensity in non-index cancer pain sites|Change from baseline in weekly worst pain intensity in non-index cancer pain sites|Change from baseline in daily average pain …	Pfizer|Eli Lilly and Company	All	18 Years and older (Adult, Older Adult)	Phase 3	156	Industry	Interventional	Allocation: Randomized|Intervention Model: Parallel Assignment|Masking: Quadruple (Participant, Care Provider, Investigator, Outcomes Assessor)|Primary Purpose: Treatment	A4091061|2013-002223-42|CANCER PAIN PH 3 SC STUDY	2015-10-28	2020-09-17	2021-06-25	2015-11-20		2021-10-19	Instituto de Oncologia de Rosario, Rosario, Santa FE, Argentina|Monash Medical Centre, Clayton, Victoria, Australia|Monash Medical Centre, East Bentleigh, Victoria, Australia|Landesklinikum Krems, Krems, Austria|Nuhr Medical Center, Senftenberg, Austria|Associacao Hospital de Caridade de Ijui, Ijui, RIO Grande DO SUL, Brazil|INCA - Instituto Nacional do Cancer / Hospital do Cancer HCIII, Rio de J…		https://ClinicalTrials.gov/show/NCT02609828
73	NCT02480634	Zoledronic Acid Combined Radiotherapy for Bone Metastasis of Non-small Cell Lung Cancer		Not yet recruiting	No Results Available	Non-small Cell Lung Cancer|Bone Metastasis	Drug: Zoledronic acid|Radiation: Radiotherapy	Percentage of Participants reach objective response|Percentage of Participants occur bone pain recurrence at 1 to 12 month after radiotherapy.|Pain relief time in/after treatment|Incidence of SRE(Skeletal-related events) again in Participants|Security of the therapy|Percentage of the osteogenic and the osteolytic sites reach objective response|Kaplan-Meier Estimates for Overall Survival after bon…	Daping Hospital and the Research Institute of Surgery of the Third Military Medical University	All	18 Years and older (Adult, Older Adult)	Phase 4	280	Other	Interventional	Allocation: Randomized|Intervention Model: Parallel Assignment|Masking: None (Open Label)|Primary Purpose: Treatment	DPRA-1023-SK	2023-06-19	2023-09-21	2023-12-22	2015-06-24		2019-01-16			https://ClinicalTrials.gov/show/NCT02480634
74	NCT01417403	Hydroxychloroquine in Treating Patients With Solid Tumors Undergoing Radiation Therapy for Bone Metastases		Terminated	No Results Available	Bone Metastases|Unspecified Adult Solid Tumor, Protocol Specific	Drug: hydroxychloroquine|Radiation: radiation therapy	MTD of hydroxychloroquine that can be safely administered to cancer patients in association with radiotherapy	Virginia Commonwealth University|National Cancer Institute (NCI)	All	18 Years and older (Adult, Older Adult)	Phase 1	10	Other|NIH	Interventional	Allocation: N/A|Intervention Model: Single Group Assignment|Masking: None (Open Label)|Primary Purpose: Treatment	MCC-13713|NCI-2011-02310|P30CA016059	2023-08-11	2023-07-14	2023-07-14	2011-08-16		2015-02-03	Virginia Commonwealth University/Massey Cancer Center, Richmond, Virginia, United States		https://ClinicalTrials.gov/show/NCT01417403
75	NCT02880943	Dose-finding, Safety and Efficacy Study of Radium-223 Dichloride (XOFIGO) in RCC Patients With Bone Metastases. (EIFFEL)	EIFFEL	Unknown status	No Results Available	Clear-cell Metastatic Renal Cell Carcinoma|Bone Metastases	Drug: XOFIGO	Dose-limiting toxicities (DLT)|Distribution of radium-223 dichloride into the bone assessed with scintigraphy of biodistribution of radium-223 dichloride|Bone response concordance between FNa-PET scan and whole-body MRI|Bone clinical benefit rate (bone objective response or stable disease, BCB)|Overall clinical benefit rate (bone and visceral objective response or stable disease, OCB)|Changes in …	Association Pour La Recherche des Thérapeutiques Innovantes en Cancérologie	All	18 Years and older (Adult, Older Adult)	Phase 1|Phase 2	42	Other	Interventional	Allocation: Non-Randomized|Intervention Model: Parallel Assignment|Masking: None (Open Label)|Primary Purpose: Treatment	EIFFEL	2023-10-16	2023-10-20	2023-02-21	2016-08-26		2016-11-08	CHU Bordeaux (St. André), Bordeaux, France|Centre François Baclesse, Caen, France|Hôpital Cochin, Paris, France|Hopital Europeen Georges Pompidou, Paris, France|Institut Gustave Roussy, Villejuif, France		https://ClinicalTrials.gov/show/NCT02880943
76	NCT03503682	Short Course Radiation Therapy in Palliative Treatment of Complicated Bone Metastases		Recruiting	No Results Available	Bone Metastases|Radiotherapy|Palliative Care	Radiation: standard treatment|Radiation: short course treatment	Efficacy of palliation using the short course scheme compared with the standard scheme|Acute toxicity in the two treatment groups|Late toxicity in the two treatment groups|Quality of Life (QoL) assessment in the two groups	IRCCS Azienda Ospedaliero-Universitaria di Bologna	All	18 Years and older (Adult, Older Adult)	Not Applicable	82	Other	Interventional	Allocation: Randomized|Intervention Model: Parallel Assignment|Masking: None (Open Label)|Primary Purpose: Treatment	RT-15-06 SHARON BONE	2017-11-08	2022-11-08	2023-11-08	April 20, 2018		April 20, 2018	Radiation Oncology Center, Department of Experimental, Diagnostic and Speciality Medicine- DIMES, University of Bologna, S.Orsola-Malpighi Hospital, Bologna, BO, Italy		https://ClinicalTrials.gov/show/NCT03503682
77	NCT02103634	NaF PET/MRI Evaluation for Bone Metastases in Breast Cancer		Completed	No Results Available	Malignant Neoplasm of Breast TNM Staging Distant Metastasis (M)|Untreated Bone Metastases	Device: NaF PET/MRI|Device: NaF PET/CT|Device: FDG PET/CT	Sensitivity of NaF PET/MRI|Image Quality|Positive predictive value of MRI sequences|Negative predictive value of MRI sequences|Specificity of MRI sequences|attenuation correction|localization|Evaluation of Bone Metastases	Case Comprehensive Cancer Center|National Cancer Institute (NCI)	All	18 Years and older (Adult, Older Adult)		29	Other|NIH	Observational	Observational Model: Case-Only|Time Perspective: Prospective	CASE5113	2014-03-01	2018-12-21	2018-12-21	April 4, 2014		2020-07-29	University Hospitals Cleveland Medical Center, Seidman Cancer Center, Case Comprehensive Cancer Center, Cleveland, Ohio, United States		https://ClinicalTrials.gov/show/NCT02103634
78	NCT00882609	F18PET/CT Versus TC-MDP Scanning to Detect Bone Mets		Unknown status	No Results Available	Bone Metastases	Device: Bone Scan: F18-Fluoride PET/CT or TC-MDP	Analysis of the diagnostic performance of [18F]NaF fluoride PET/CT scanning	American College of Radiology - Image Metrix|World Molecular Imaging Society	All	18 Years and older (Adult, Older Adult)	Phase 3	550	Industry|Other	Interventional	Allocation: Randomized|Intervention Model: Parallel Assignment|Masking: Triple (Participant, Investigator, Outcomes Assessor)|Primary Purpose: Diagnostic	AMI-2008-01	2023-01-09	2023-12-12	2023-06-13	April 16, 2009		2012-11-29	Scottsdale Medical Imaging, Scottsdale, Arizona, United States|Silicon Valley Imaging, Freemont, California, United States|Cedar-Sinai Medical Center, Los Angeles, California, United States|VA West Los Angles Medical Center, Los Angeles, California, United States|UCLA, Los Angeles, California, United States|Stanford University Medical Center, Stanford, California, United States|SouthCoast Imaging…		https://ClinicalTrials.gov/show/NCT00882609
79	NCT00765687	Screening Non Small Cell Lung Cancer With Bone Metastasis and Efficacy and Safety Research of Receiving Bisphosphonates	BLEST	Completed	No Results Available	Non-small Cell Lung Cancer|Bone Metastases	Drug: bisphosphates	Skeleton-related event|overall survival	Sun Yat-sen University|Novartis	All	18 Years and older (Adult, Older Adult)	Phase 4	432	Other|Industry	Interventional	Allocation: N/A|Intervention Model: Single Group Assignment|Masking: None (Open Label)|Primary Purpose: Prevention	CZOL446ECN07	2023-08-08	2023-05-12	2023-05-12	2008-10-03		2013-12-10	SunYat-senU, GuangZhou, Guangdong, China		https://ClinicalTrials.gov/show/NCT00765687
80	NCT03377517	Radiosurgical Hypophysectomy for Bone Metasteses Pain		Recruiting	No Results Available	Bone Metastases	Radiation: radiosurgical hypophysectomy	Change in Intensity of Bone Pain|Rate of change of disease spread|Rate of Change of Quality of Life|Rate of change in opioid use|Rate of biochemical endocrinopathy|Rate of change of optic nueropathy|Rate of change of neurologic toxicity|Rate of change of insipidus diabetes|Rate of change in costs|Rate of change of cortisol|Rate of change of pain with respect to hormones|Rate of change of pain wit…	Sidney Kimmel Comprehensive Cancer Center at Johns Hopkins|Accuray Incorporated	All	18 Years to 100 Years (Adult, Older Adult)	Not Applicable	16	Other|Industry	Interventional	Allocation: N/A|Intervention Model: Single Group Assignment|Masking: None (Open Label)|Primary Purpose: Treatment	J17181|IRB00158648	2018-05-08	2023-12-23	2023-11-25	2017-12-19		2022-09-02	The Sidney Kimmel Comprehsensive Cancer Center at Johns Hopkins, Baltimore, Maryland, United States		https://ClinicalTrials.gov/show/NCT03377517
81	NCT03134261	Diagnostic Imaging of Bone Metastases in Prostate Cancer Patients	DIMAB	Unknown status	No Results Available	Prostate Cancer Metastatic to Bone	Diagnostic Test: WB-MRI|Diagnostic Test: SPECT-CT|Diagnostic Test: Cholin-PET-CT|Diagnostic Test: PSMA-PET-CT	Diagnostic accuracy	Herlev Hospital	Male	18 Years and older (Adult, Older Adult)	Not Applicable	300	Other	Interventional	Allocation: Non-Randomized|Intervention Model: Sequential Assignment|Masking: None (Open Label)|Primary Purpose: Diagnostic	DIMAB	April 2014	April 2018	April 2018	April 28, 2017		2017-05-05	Department of Radioogy/Department of Nuclear Medicine, Herlev, Denmark		https://ClinicalTrials.gov/show/NCT03134261
82	NCT01586273	Multicenter Study of Magnetic Resonance-guided High Intensity Focused Ultrasound for Pain Palliation of Bone Metastases		Terminated	No Results Available	Bone Metastasis	Device: MR-HIFU treatment for pain palliation of bone metastases	Pain response to therapy|Total number of Adverse Events|Quality of Life (as measured by questionnaire)|Subgroup analysis: pain response in radiation naïve patients|Temporal evolution of pain response during the first 30 days after treatment	Philips Healthcare	All	18 Years and older (Adult, Older Adult)	Not Applicable	20	Industry	Interventional	Allocation: N/A|Intervention Model: Single Group Assignment|Masking: None (Open Label)|Primary Purpose: Treatment	906273	2023-09-12	2023-09-16	2023-11-16	April 26, 2012		April 4, 2017	Samsung Medical Center, Seoul, Korea, Republic of|University Medical Center Utrecht, Utrecht, Netherlands|Royal Marsden Hospital / Institute of Cancer Research, Sutton, Surrey, United Kingdom		https://ClinicalTrials.gov/show/NCT01586273
83	NCT01339780	Imaging of Prostate and Breast Cancer Bone Metastases Using Magnetic Resonance Imaging and Nuclear Medicine Techniques		Completed	No Results Available	Bone Metastases	Radiation: BS, SPECT/CT, PET/CT, MRI	Number of participants with bone metastases	Turku University Hospital	All	40 Years to 80 Years (Adult, Older Adult)	Not Applicable	53	Other	Interventional	Allocation: Non-Randomized|Intervention Model: Single Group Assignment|Masking: None (Open Label)|Primary Purpose: Diagnostic	113/180/2010	2023-02-11	2023-01-14	2023-01-14	April 21, 2011		2014-02-28	Turku University Hospital, Turku, Kiinamyllynkatu 4-8, Finland		https://ClinicalTrials.gov/show/NCT01339780
84	NCT01767935	Cryosurgery and Radiation Therapy in Treating Patients With Painful Bone Metastases		Terminated	Has Results	Bone Metastases|Pain	Procedure: cryosurgery|Radiation: radiation therapy|Procedure: quality-of-life assessment	Pain Level at 24 Hours Before Cryosurgery, as Measured by the BPI|Pain Medication Level, Assessed by Changes in Narcotic Medication Usage|Adverse Events, Graded According to the National Cancer Institute (NCI) Common Terminology Criteria for Adverse Events (CTCAE) Version 4.0|Pain After Cryosurgery, as Measured by the BPI|Number of Participants Who Survived	Wake Forest University Health Sciences|National Cancer Institute (NCI)|Endocare, Inc.	All	18 Years and older (Adult, Older Adult)	Not Applicable	1	Other|NIH|Industry	Interventional	Allocation: N/A|Intervention Model: Single Group Assignment|Masking: None (Open Label)|Primary Purpose: Treatment	IRB00020528|NCI-2012-02087|P30CA012197|CCCWFU 97212	2023-07-14	2023-12-14	2023-12-14	2013-01-15	2017-12-13	2018-11-14	Comprehensive Cancer Center of Wake Forest University, Winston-Salem, North Carolina, United States		https://ClinicalTrials.gov/show/NCT01767935
85	NCT02293642	Bone Pain Score Validation Initiative	ARIE	Completed	No Results Available	Bone Metastasis		QoL|Impact of characteristics on questionnaire scores|Sensitivity of questionnaire|Sequence effects of questionnaires	iOMEDICO AG	All	18 Years and older (Adult, Older Adult)		370	Industry	Observational	Observational Model: Cohort|Time Perspective: Prospective	IOM-268	2023-12-14	2023-06-16	2023-06-16	2014-11-18		2018-08-10	Multiple Sites All Over Germany, Multiple Locations, Germany		https://ClinicalTrials.gov/show/NCT02293642
86	NCT05167669	Pain Relief in Symptomatic Bone Metastases With Adjuvant Hyperthermia MR Guided HIFU	BM-RT-HIFU	Not yet recruiting	No Results Available	Bone Metastases|Radiotherapy|Pain|MRI	Device: HIFU-MRI guided	Accurate elevation of temperature measured by MRI thermometry (degree celsius)|Safety and patient tolerance according to The adverse events (CTCAE v5.0) (Art. 2 Abs 58 MDR)|Complete pain response according to International Bone Metastases Consensus Endpoint score (BPI score)|Pain assessment using Brief Pain Inventory score (BPI score)|quality of life using EORTC QLQ-C15-PAL (bone metastases modul…	Sana Boudabbous|University Hospital, Geneva	All	18 Months and older (Child, Adult, Older Adult)	Not Applicable	10	Other	Interventional	Allocation: N/A|Intervention Model: Single Group Assignment|Masking: None (Open Label)|Primary Purpose: Treatment	2020-02998	2022-01-10	2024-12-31	2024-12-31	2021-12-22		2021-12-22			https://ClinicalTrials.gov/show/NCT05167669
87	NCT01358539	Palliation: the Effect of Education on Pain	PEEP	Completed	No Results Available	Bone Metastases	Behavioral: Pain education	a decrement of the number of patients whose worst pain intensity remains above 4|improvement of quality of life	University Medical Center Groningen|ZonMw: The Netherlands Organisation for Health Research and Development|Kankerbestrijding	All	18 Years to 80 Years (Adult, Older Adult)	Phase 3	354	Other	Interventional	Allocation: Randomized|Intervention Model: Single Group Assignment|Masking: None (Open Label)|Primary Purpose: Supportive Care	ZonMW 11510007	2023-09-10	April 2016	April 2016	2011-05-23		2021-02-04	University Medical Center Groningen, Groningen, Netherlands		https://ClinicalTrials.gov/show/NCT01358539
88	NCT03869762	Denosumab in Combination With Enzalutamide in Progressive Metastatic Castrate-resistant Prostate Cancer and Bone Metastases.	DICE	Suspended	No Results Available	Castration-resistant Prostate Cancer|Metastatic Cancer|Bone Metastases	Drug: Xgeva|Drug: Xtandi	Radiographic progression free survival (rPFS)|Overall survival|PSA progression free survival|Time to first skeletal-related event|Pain assessment	Cancer Trials Ireland	Male	18 Years and older (Adult, Older Adult)	Phase 2	7	Other	Interventional	Allocation: N/A|Intervention Model: Single Group Assignment|Masking: None (Open Label)|Primary Purpose: Treatment	CTRIAL-IE 17-17	2019-01-09	2023-01-23	2023-03-24	2019-03-11		April 26, 2021	Galway University Hospital, Galway, Connacht, Ireland|Sligo University Hospital, Sligo, Connacht, Ireland|Adelaide and Meath incorporating National Children's Hopsital, Dublin 24, Leinster, Ireland|St. Vincent's Hospital, Dublin 4, Leinster, Ireland|Cork University Hospital, Cork, Munster, Ireland|University Hospital Limerick, Limerick, Munster, Ireland|University Hospital Waterford, Waterford, M…		https://ClinicalTrials.gov/show/NCT03869762
89	NCT01784393	Chemoradiation for Bone Metastasis		Completed	No Results Available	Breast Cancer|Bone Metastasis|Pain	Radiation: chemoradiation	Change from Baseline in pain score at 12 wks|Change in pain medications consupmtion at 12 weeks compared to basline	Rabin Medical Center|Sheba Medical Center	Female	18 Years and older (Adult, Older Adult)	Phase 2	29	Other	Interventional	Allocation: Non-Randomized|Intervention Model: Single Group Assignment|Masking: None (Open Label)|Primary Purpose: Treatment	Bone-X-11	2023-05-04	April 2007	April 2007	2013-02-05		2013-02-05	Rabin Medical Center, Beilinson Campus, Petach Tikva, Israel		https://ClinicalTrials.gov/show/NCT01784393
90	NCT04568291	CTC in Lung Caner Patients With Bone Metastases		Recruiting	No Results Available	Lung Cancer|Bone Metastases|Single Cell Sequencing Technology	Other: model treatment|Other: routine treatment	SREs(Skeletal related events)	Shanghai 6th People's Hospital	All	18 Years to 75 Years (Adult, Older Adult)	Not Applicable	160	Other	Interventional	Allocation: Randomized|Intervention Model: Parallel Assignment|Masking: None (Open Label)|Primary Purpose: Treatment	CTC01	2020-10-01	2022-03-31	2022-12-31	2020-09-29		2021-08-12	Shanghai Sixth People'S Hospital, Shanghai, Other (Non U.s.), China		https://ClinicalTrials.gov/show/NCT04568291
91	NCT05406063	Stereotactic Multiple Fraction Radiotherapy for Non-spine Bone Metastases	SMILE	Active, not recruiting	No Results Available	Radiation Therapy|Bone Metastases|Pain	Radiation: SBRT	Pain relief (response rate) measured with the Visual Analog Scale (VAS) from Baseline to 3 months after treatment.	Kantonsspital Winterthur KSW|Krebsforschung Schweiz, Bern, Switzerland	All	18 Years and older (Adult, Older Adult)	Not Applicable	162	Other	Interventional	Allocation: Randomized|Intervention Model: Parallel Assignment|Masking: None (Open Label)|Primary Purpose: Treatment	2022-00631	2022-06-01	2025-05-31	2026-05-31	2022-06-06		2022-08-18	Kantonsspital Winterthur, Winterthur, Kanton Zürich, Switzerland		https://ClinicalTrials.gov/show/NCT05406063
92	NCT03547557	MR Guided Focused Ultrasound Surgery in the Treatment of Pain From Bone Tumors w/ the ExAblate 2000 Strappable System	BM005	Completed	No Results Available	Bone Metastases	Device: Exablate 2000 strappable system	Number of participants with treatment-related adverse events|Change in pain Numerical Rating Scale (NRS) from pre-treatment to post treatment	InSightec	All	18 Years and older (Adult, Older Adult)	Not Applicable	10	Industry	Interventional	Allocation: N/A|Intervention Model: Single Group Assignment|Masking: None (Open Label)|Primary Purpose: Supportive Care	BM005	2023-01-07	2023-02-09	2023-03-09	2018-06-06		2018-06-06	Sheba Medical Center Oncology Department, Tel Hashomer, Israel		https://ClinicalTrials.gov/show/NCT03547557
93	NCT03597984	Reduction of Pain Symptoms With Stereotactic Radiotherapy on Bone Metastases	PREST	Unknown status	No Results Available	Bone Metastases|Radiotherapy|Technology	Radiation: Simultaneous Integrated Boost-SIB on macroscopic metastases	Pain control [EFFICACY and PAIN]|Pain control duration [EFFICACY and PAIN]|Local control [EFFICACY]|Symptom Progression Free Survival (SPFS) [EFFICACY and PAIN]|Progression-free survival - PFS [EFFICACY]|Overall survival [EFFICACY]|Quality of Life (QoL) [EFFICACY and QUALITY OF LIFE]|Rate of retreatments [EFFICACY]	Fondazione Policlinico Universitario Agostino Gemelli IRCCS	All	18 Months and older (Child, Adult, Older Adult)	Not Applicable	330	Other	Interventional	Allocation: Randomized|Intervention Model: Parallel Assignment|Masking: Single (Participant)|Primary Purpose: Treatment	0013663/18	2019-07-01	2019-07-01	2020-12-28	2018-07-24		2019-07-05			https://ClinicalTrials.gov/show/NCT03597984
94	NCT03831243	A Trial to Improve Quality of Life With Stereotactic Body Radiotherapy for Patients With Painful Bone Metastases	ROBOMET	Recruiting	No Results Available	Metastasis to Bone|Radiotherapy|Neoplasm Metastasis	Radiation: Stereotactic body radiotherapy|Radiation: 3D-conformal radiotherapy	Pain response|Incidence of pain flare|Duration of pain response|Re-irradiation need|Acute toxicity Measured with CTCAE version 5.0|Late toxicity Measured with CTCAE version 5.0|Impact of treatment on Quality of Life: EORTC quality of life questionnaire (QLQ) BM22|Number of Subsequent Serious Skeletal events	Cancer Research Antwerp	All	18 Years and older (Adult, Older Adult)	Not Applicable	126	Other	Interventional	Allocation: Randomized|Intervention Model: Parallel Assignment|Masking: Single (Participant)|Primary Purpose: Treatment	CTOR18072GZA	April 9, 2019	2022-03-01	2023-03-01	2019-02-05		2020-12-17	Radiotherapy department, GZA Hospitals, Wilrijk, Antwerp, Belgium		https://ClinicalTrials.gov/show/NCT03831243
95	NCT01409720	Isometric Muscle Training in Patients With Spinal Bony Metastases Under Radiation Therapy	DISPO	Completed	No Results Available	Vertebral Bony Metastases	Other: exercise	feasibility of isometric exercise in vertebral bony metastases|progression-free survival (PFS)|fracture-free survival (FFS)|bone density|pain reduction|Quality of life|Fatigue	Heidelberg University	All	18 Years to 80 Years (Adult, Older Adult)	Phase 2	60	Other	Interventional	Allocation: Randomized|Intervention Model: Parallel Assignment|Masking: None (Open Label)|Primary Purpose: Treatment	DISPO	2023-09-11	2023-09-12	2023-09-13	2011-08-04		2014-03-20	Dept of Radiation Oncology, University of Heidelberg, Germany, Heidelberg, Germany		https://ClinicalTrials.gov/show/NCT01409720
96	NCT02582749	Androgen Deprivation Therapy Radium-223 Dichloride in Metastatic Prostate Cancer With Bone Metastases		Terminated	Has Results	Prostate Cancer|Bone Metastases|Prostate Neoplasms	Drug: LHRH agonist/antagonist|Drug: Bicalutamide|Radiation: Radium-223 dichloride	Radiological Progression-Free Survival (rPFS)|Number of Patients With Grade 3 Through Grade 5 Adverse Events That Are Related to Study Drug, Graded According to NCI Common Terminology Criteria for Adverse Events v 4.0 (CTCAE)|Time to First Skeletal-Related Event (SRE)|Secondary Neoplasms|PSA Complete Response Rates|PSA Partial Response Rates|Median Time to Castration Resistance|2-Year PSA Progres…	Ajjai Alva, MD|Hoosier Cancer Research Network|Bayer Healthcare Pharmaceuticals, Inc./Bayer Schering Pharma	Male	18 Years and older (Adult, Older Adult)	Phase 2	16	Other|Industry	Interventional	Allocation: Randomized|Intervention Model: Parallel Assignment|Masking: None (Open Label)|Primary Purpose: Treatment	HCRN GU13-170	April 2016	2017-09-14	2017-09-14	2015-10-21	2019-07-09	2022-07-11	University of Arizona Cancer Center at Dignity Health St. Joseph's, Phoenix, Arizona, United States|Illinois CancerCare, P. C., Peoria, Illinois, United States|Indiana University Melvin and Bren Simon Cancer Center, Indianapolis, Indiana, United States|IU Health Central Indiana Cancer Centers, Indianapolis, Indiana, United States|University of Iowa Hopital and Clinics, Iowa City, Iowa, United Sta…	"Study Protocol and Statistical Analysis Plan", https://ClinicalTrials.gov/ProvidedDocs/49/NCT02582749/Prot_SAP_000.pdf	https://ClinicalTrials.gov/show/NCT02582749
97	NCT02410044	Prospective PRO/QoL Registry for Patients With Bone Metastases of Breast or Prostate Cancer	PROBone	Completed	No Results Available	Breast Cancer|Prostate Cancer|Bone Metastases		Patient Reported Outcomes (PRO) regarding bone pain and the impact of bone pain on quality of life and daily activities in patients with bone metastases treated with osteoprotective agents.|Patient Reported Outcomes regarding the impact of treatment on daily life	iOMEDICO AG	All	18 Years and older (Adult, Older Adult)		500	Industry	Observational	Observational Model: Cohort|Time Perspective: Prospective	IOM - 11279	2014-12-23	2019-08-16	2020-08-16	April 7, 2015		2020-09-10	Multiple sites all over Germany, Multiple Locations, Germany		https://ClinicalTrials.gov/show/NCT02410044
98	NCT03963531	Patterns of Care and Outcomes in Patients With Metastatic Bone Tumors (METABONE)	METABONE	Active, not recruiting	No Results Available	Metastatic Bone Tumor	Other: chemotherapy, surgery, radiotherapy, interventional radiology.	overall survival (OS)|Time to next treatment (TNT)	Institut Bergonié|French Sarcoma Group	All	Child, Adult, Older Adult		2500	Other	Observational	Observational Model: Cohort|Time Perspective: Prospective	IB2019-METABONE	2023-01-07	2023-01-24	2023-01-25	2019-05-24		2022-03-07	Institut Bergonié, Comprehensive Cancer Center, Bordeaux, France		https://ClinicalTrials.gov/show/NCT03963531
99	NCT00334139	Effect of Zoledronic Acid on Bone Metabolism in Patients With Bone Metastasis and Prostate or Breast Cancer		Completed	No Results Available	Prostate Cancer|Breast Cancer|Bone Metastasis	Drug: Zoledronic Acid	Bone turnover assessed by bone turnover parameters|Pain|Change in prostate specific antigen|Quality of Life|Correlation between pain and bone turnover|Correlation between bone complications and bone turnover	Novartis Pharmaceuticals|Novartis	All	18 Years and older (Adult, Older Adult)	Phase 4	411	Industry	Interventional	Allocation: N/A|Intervention Model: Single Group Assignment|Masking: None (Open Label)|Primary Purpose: Treatment	CZOL446EDE28	2023-05-06	2023-07-09	2023-07-09	2006-06-06		2017-02-07	Novartis Investigative Site, Ulm, Germany		https://ClinicalTrials.gov/show/NCT00334139
100	NCT02511678	Multicenter Study of Cryoablation for Palliation of Painful Bone Metastases	MOTION	Completed	Has Results	Pain|Neoplasm Metastasis|Bone Metastasis of Diverse Origins	Device: Cryoablation	Change From Baseline in Worst Pain Scores as Assessed by the Brief Pain Inventory-Short Form (BPI-SF) at Week 8	Boston Scientific Corporation	All	18 Years and older (Adult, Older Adult)	Not Applicable	73	Industry	Interventional	Allocation: N/A|Intervention Model: Single Group Assignment|Masking: None (Open Label)|Primary Purpose: Treatment	CGC15-BNE098	2016-02-15	2018-03-12	2018-03-12	2015-07-30	2019-09-04	2021-07-19	UCLA Ronald Reagan Medical Center, Los Angeles, California, United States|Emory University Hospital, Atlanta, Georgia, United States|Massachusetts General Hospital, Boston, Massachusetts, United States|Crittenton Hospital, Rochester, Michigan, United States|Mayo Clinic Rochester, Rochester, Minnesota, United States|Washington University in St. Louis, Saint Louis, Missouri, United States|Rhode Isl…	"Study Protocol", https://ClinicalTrials.gov/ProvidedDocs/78/NCT02511678/Prot_000.pdf|"Statistical Analysis Plan", https://ClinicalTrials.gov/ProvidedDocs/78/NCT02511678/SAP_001.pdf	https://ClinicalTrials.gov/show/NCT02511678
101	NCT00762346	Efficacy and Safety Study of ZOMETA® in Treatment of High-level NTX Non Small Cell Lung Cancer With Bone Metastasis		Completed	No Results Available	Non Small Cell Lung Cancer|Bone Metastases|High NTX Level	Drug: zometa	Skeleton-related event|OS	Sun Yat-sen University|Novartis	All	18 Years and older (Adult, Older Adult)	Phase 4	156	Other|Industry	Interventional	Allocation: N/A|Intervention Model: Single Group Assignment|Masking: None (Open Label)|Primary Purpose: Treatment	CZOL446ECN06T	2023-09-08	2023-03-13	2023-03-13	2008-09-30		2013-12-10	cancer center, Sun Yat-sen University, Guangzhou, Guangdong, China		https://ClinicalTrials.gov/show/NCT00762346
102	NCT01309048	Magnetic Resonance-Guided High Intensity Focused Ultrasound for Palliation of Painful Skeletal Metastases		Completed	No Results Available	Bone Metastasis	Device: Philips MR-guided HIFU system	Reduction of Pain Score|Reduction of Pain Medication|Complications and Adverse Events|Changes in bone density|Quality of Life	Philips Healthcare	All	18 Years and older (Adult, Older Adult)	Phase 1|Phase 2	10	Industry	Interventional	Allocation: N/A|Intervention Model: Single Group Assignment|Masking: None (Open Label)|Primary Purpose: Treatment	2082011	2023-01-11	2023-06-12	2023-06-12	2011-03-04		2012-08-29	Sunnybrook Health Sciences Centre, Toronto, Ontario, Canada		https://ClinicalTrials.gov/show/NCT01309048
103	NCT01964677	MR-HIFU for Bone Metastases		Completed	No Results Available	Cancer|Bone Metastases	Device: Magnetic Resonance Image-guided High Intensity Focused Ultrasound (MR-HIFU)	Pain response	Institute of Cancer Research, United Kingdom|Philips Medical Systems	All	18 Years and older (Adult, Older Adult)	Not Applicable	12	Other|Industry	Interventional	Allocation: N/A|Intervention Model: Single Group Assignment|Masking: None (Open Label)|Primary Purpose: Treatment	12/LO/0424 CCR3772	2023-01-14	2016-11-14	2016-11-14	2013-10-17		2017-08-22	The Royal Marsden NHS Foundation Trust, Sutton, Surrey, United Kingdom		https://ClinicalTrials.gov/show/NCT01964677
104	NCT02864784	Investigating the Safety, Tolerability and Efficacy of Amorphous Calcium Carbonate (ACC) on the Treatment of Subjects With CRPC		Unknown status	No Results Available	Castrate Resistant Prostate Cancer With Bone Metastasis	Drug: Amorphous calcium carbonate|Other: Placebo	Changes in the number of Skeletal Related Events (SREs)|Time from randomization to onset of first SRE.|Proportion of subjects (%) with SREs.|Proportion of subjects (%) with evidence of measureable and evaluable disease progression or SREs.|Progression Free Survival (PFS).|Number of subjects that are receiving radiation as a rescue treatment|Frequency and incidence of treatment emergent adverse ev…	Amorphical Ltd.	All	18 Years and older (Adult, Older Adult)	Phase 1	60	Industry	Interventional	Allocation: Randomized|Intervention Model: Parallel Assignment|Masking: Quadruple (Participant, Care Provider, Investigator, Outcomes Assessor)|Primary Purpose: Treatment	AMCS-ONCO-PR-001-CTIL	2023-10-16	April 2017	April 2017	2016-08-12		2016-08-12	Soroka Medical Center, Beer sheva, Israel		https://ClinicalTrials.gov/show/NCT02864784
105	NCT03404362	MRgFUS Versus EBRT in Patients With Metastatic Non-spinal Bone Disease		Completed	No Results Available	Secondary Bone Cancer|Bone Metastases	Procedure: Bone Metastases Pain treatment	Determine the effect of MRgFUS in terms of level of pain relief and decrease in analgesics/opiate and improved quality of life.	University of Roma La Sapienza	All	18 Years and older (Adult, Older Adult)	Not Applicable	198	Other	Interventional	Allocation: Non-Randomized|Intervention Model: Crossover Assignment|Masking: None (Open Label)|Primary Purpose: Treatment	BM-Fus Vs RT	2023-01-17	2023-05-19	2023-09-20	2018-01-19		2022-02-17	Alessandro Napoli, Rome, Italy|Sapienza University of Rome, Policlinico Umberto I Hospital, Rome, Italy		https://ClinicalTrials.gov/show/NCT03404362
106	NCT04157166	Evaluation of an Accelerated Body-whole Bone CT Procedure With the CZT "VERITON-CT ?" Camera	OSS	Unknown status	No Results Available	Bone Metastases	Diagnostic Test: to record a whole body 3D of 25 minutes in camera VERITON-CT ?	concordance between the two procedures|concordance between the two procedures 3D	Central Hospital, Nancy, France|GIE NANCYCLOTEP	All	18 Years and older (Adult, Older Adult)	Not Applicable	146	Other	Interventional	Allocation: Randomized|Intervention Model: Parallel Assignment|Masking: None (Open Label)|Primary Purpose: Diagnostic	Central HNF	2020-01-20	2021-01-21	2022-01-20	2019-11-08		2019-11-08			https://ClinicalTrials.gov/show/NCT04157166
107	NCT03106675	MR Imaging- Guided High Intensity Focused Ultrasound (HIFU) Therapy of Bone Metastases		Unknown status	No Results Available	Bone Metastases|Bone Neoplasm|Bone Cancer|Bone Lesion	Device: Thermal ablation of bone metastasis with MR-HIFU device Philips Sonalleve coupled with Philips Ingenia 3.0T|Device: Varian Truebeam Radiotherapy System	Change in subjective pain relieve|Change in tumor morphology in imaging|Change in pain medication usage|Change in general subjective health|Change in cytokine-levels|Change in tumor-specific markers	Turku University Hospital	All	18 Years and older (Adult, Older Adult)	Not Applicable	30	Other	Interventional	Allocation: Non-Randomized|Intervention Model: Parallel Assignment|Masking: None (Open Label)|Primary Purpose: Supportive Care	133/2016	2017-05-15	2022-01-30	2022-03-30	April 10, 2017		April 24, 2017			https://ClinicalTrials.gov/show/NCT03106675
108	NCT00667199	BAY88-8223, Does Response Study in HRPC Patients		Completed	No Results Available	Hormone Refractory Prostate Cancer|Bone Metastases	Drug: Radium-223 dichloride (BAY88-8223)	Pain Assessment (using a 100mm Visual Analogue Scale)|Analgesic consumption|Reduction of pain: the pain dimension of Quality of Life assessed using the Brief Pain Inventory (BPI) form, with total pain score and subtotals, after injection and compared to scores at baseline|Duration of pain relief: measured as the time between the first and last evaluation time points at which the pain response cri…	Bayer	Male	40 Years and older (Adult, Older Adult)	Phase 2	100	Industry	Interventional	Allocation: Randomized|Intervention Model: Parallel Assignment|Masking: Double (Participant, Investigator)|Primary Purpose: Treatment	15305|BC1-03|2004-000299-15	2005-05-30	April 1, 2008	2009-10-06	April 28, 2008		2018-12-19			https://ClinicalTrials.gov/show/NCT00667199
109	NCT04109937	External Beam Radiation Therapy Post Surgery in Patients With Lower Extremity Bone Metastases Randomized Efficacy Trial	EXPLORE	Not yet recruiting	No Results Available	Bone Metastases|Lower Extremity Fracture|Pathological Fracture|Impending Fracture	Radiation: External beam radiation therapy	Subsequent surgery after primary surgery|Re-irradiation/radiation|Subsequent surgery (between 13 months and 24 months)|Post-operative functional status and Karnofsky Performance Status (KPS)|Post-operative pain and analgesic use|Radiologically determined local progression|Quality of life through functional ability|Overall survival|Cost-effectiveness	Sunnybrook Health Sciences Centre	All	18 Years and older (Adult, Older Adult)	Not Applicable	300	Other	Interventional	Allocation: Randomized|Intervention Model: Parallel Assignment|Masking: None (Open Label)|Primary Purpose: Treatment	EXPLORE	2023-10-20	2023-10-25	2023-10-26	2019-10-01		April 10, 2020	Sunnybrook Health Sciences Centre, Toronto, Ontario, Canada		https://ClinicalTrials.gov/show/NCT04109937
110	NCT05495802	Regional Database for Collecting Clinical-biological and Imaging Data "Secondary Bone Oncology and Bone Localizations of Hematologic Diseases"	OOSLOH	Not yet recruiting	No Results Available	Bone Metastases		Percentage of alive patients|Percentage of patients without bone disease recurrence|Time to bone disease recurrence|Number of bone recurrence Number of bone recurrence|Epidemiological datas	University Hospital, Lille|Lille University Hospital Emergence Fund	All	18 Years and older (Adult, Older Adult)		5000	Other	Observational	Observational Model: Cohort|Time Perspective: Prospective	2019_59|2021-A00829-32	2023-12-22	1932-11-01	1932-12-01	2022-08-10		2022-08-10			https://ClinicalTrials.gov/show/NCT05495802
111	NCT01391234	Rapid Radiation Therapy for Painful Osseous Metastatic Disease		Completed	No Results Available	Bone Metastases	Radiation: STAT RT planning and delivery workflow	Pain relief as defined by the International Bone Metastases Consensus Group|Treatment toxicity|Quality of life|Patient satisfaction|The accuracy of new techniques to further optimize the STAT RT workflow	University of Virginia	All	18 Years and older (Adult, Older Adult)	Not Applicable	28	Other	Interventional	Allocation: N/A|Intervention Model: Single Group Assignment|Masking: None (Open Label)|Primary Purpose: Treatment	15625	2023-06-11	2023-07-14	2023-05-15	2011-07-11		2017-05-08	University of Virginia, Charlottesville, Virginia, United States		https://ClinicalTrials.gov/show/NCT01391234
112	NCT00264420	Safety and Efficacy Study of Concomitant Radiotherapy and Zoledronic Acid for Bone Metastases Palliation		Completed	No Results Available	Bone Metastases|Breast Cancer|Lung Cancer|Prostate Cancer	Drug: zoledronic acid	PET-CT|X-ray, baseline|physical exam	The Cleveland Clinic|Novartis	All	18 Years and older (Adult, Older Adult)	Phase 1	4	Other|Industry	Interventional	Allocation: Non-Randomized|Intervention Model: Single Group Assignment|Masking: None (Open Label)|Primary Purpose: Treatment	IRB7743|Case 8Y04	2023-12-05		2023-03-07	2005-12-12		2010-12-21			https://ClinicalTrials.gov/show/NCT00264420
113	NCT01640847	MRI Guided High Intensity Focused Ultrasound (HIFU) and ThermoDox for Palliation of Painful Bone Metastases		Withdrawn	No Results Available	Painful Bone Metastases|Breast Carcinoma|Non-small Cell Lung Cancer|Small Cell Lung Cancer|Adenocarcinoma	Drug: High Intensity Focused Ultrasound (HIFU) in combination with ThermoDox	Rate of complete pain response|Adverse Events	Imunon|Philips Healthcare	All	18 Years and older (Adult, Older Adult)	Phase 2	0	Industry	Interventional	Allocation: Non-Randomized|Intervention Model: Single Group Assignment|Masking: None (Open Label)|Primary Purpose: Treatment	106-10-201	2023-07-12	2023-06-13	2023-07-13	2012-07-16		2017-02-07			https://ClinicalTrials.gov/show/NCT01640847
114	NCT01085565	Focused Ultrasound Surgery in the Treatment of Pain Resulting From Metastatic Bone Tumors With the ExAblate 2100 Conformal Bone System		Completed	No Results Available	Bone Cancer|Bone Metastases|Pain	Device: ExAblate 2100	Safety|Efficacy|Effectiveness	InSightec	All	18 Years and older (Adult, Older Adult)	Phase 2	50	Industry	Interventional	Allocation: Non-Randomized|Intervention Model: Single Group Assignment|Masking: None (Open Label)|Primary Purpose: Treatment	BM011	2023-03-10	2023-03-13	2023-03-13	2010-03-12		2016-03-08	Sheba MC, Ramat Gan, Israel		https://ClinicalTrials.gov/show/NCT01085565
115	NCT05101824	Bony M - Stereotactic Ablative Radiotherapy (SABR) of Bony Metastases in Patients With Oligometastatic Disease		Active, not recruiting	No Results Available	Oligometastatic Disease|Bone Metastases|Stereotactic Body Radiotherapy	Radiation: SABR	local control rate (LC) at 1-year post SABR|Rate of Symptomatic Skeletal Event (SSE) at the irradiated site(s)|Pain, change from baseline evaluated by "Numeric Pain Rating Scale (NPRS)"|NCI CTCAE = grade 3 toxicity|NCI CTCAE = grade 3 late toxicity|Local progression free survival|Progression-free survival (PFS)|Time to progression (TTP) outside the radiation field|Overall survival (OS)|Quality of…	Gitte Fredberg Persson MD PhD|Herlev Hospital	All	18 Years and older (Adult, Older Adult)	Not Applicable	67	Other	Interventional	Allocation: N/A|Intervention Model: Single Group Assignment|Masking: None (Open Label)|Primary Purpose: Treatment	H-19039071	2019-11-01	2022-11-01	2027-11-01	2021-11-01		2022-01-28	Aalborg Universitetshospital, Aalborg, Denmark|Herlev Hospital, Herlev, Denmark|Rigshospitalet, København, Denmark|Odense University Hospital, Odense, Denmark|St Olavs Universitetssykehus,, Trondheim, Norway|Ålesund sjukehus, Ålesund, Norway		https://ClinicalTrials.gov/show/NCT05101824
116	NCT01091883	Study Comparing the Safety and Effectiveness of Magnetic Resonance Guided Focused Ultrasound (MRgFUS) and External Beam Radiation (EBRT) for Treatment of Metastatic Bone Tumors and Multiple Myeloma		Completed	No Results Available	Bone Cancer|Bone Metastases|Pain	Device: Exablate treatment|Radiation: Radiation	Safety of treatment|NRS score|Pain Medication dose and quantity|Quality of Life score	InSightec	All	18 Years and older (Adult, Older Adult)	Not Applicable	60	Industry	Interventional	Allocation: Randomized|Intervention Model: Parallel Assignment|Masking: Single (Participant)|Primary Purpose: Treatment	BM016	2023-05-10	2023-01-19	2023-03-19	2010-03-24		2019-03-13	Taipei Medical University Hospital, Taipei city, Taipei, Taiwan		https://ClinicalTrials.gov/show/NCT01091883
117	NCT00830180	Open Label Extension In Cancer Patients		Completed	Has Results	Neoplasms|Bone Metastases	Biological: Anti-NGF AB	Change From Parent Study (A4091003 [NCT00545129]) Baseline in Brief Pain Inventory-Short Form (BPI-sf) Average Pain Score for at Weeks 4, 8, 16, 24, 40, 48, 56 and 64|Change From A4091029 Baseline in BPI-sf Average Pain Score at Weeks 4, 8, 16, 24, 40, 48, 56 and 64|Change From Parent Study (A4091003 [NCT00545129]) Baseline in BPI-sf Worst Pain Score at Weeks 4, 8, 16, 24, 40, 48, 56 and 64|Chang…	Pfizer	All	18 Years and older (Adult, Older Adult)	Phase 2	41	Industry	Interventional	Allocation: Non-Randomized|Masking: None (Open Label)|Primary Purpose: Treatment	A4091029|2008-005182-66|CANCER PAIN OL EXTENSION	2009-10-29	2013-02-14	2013-02-14	2009-01-27	2021-02-02	April 5, 2021	UCSD Center for Pain Medicine, La Jolla, California, United States|UCSD Medical Center - Thornton Hospital, La Jolla, California, United States|UCSD Periman Ambulatory Care Center, La Jolla, California, United States|UCSD Moores Cancer Center, La Jolla, California, United States|WK River Cities Clinical Research Center, Shreveport, Louisiana, United States|Huntsman Cancer Institute, Salt Lake Cit…		https://ClinicalTrials.gov/show/NCT00830180
118	NCT03353090	Double-bed SPECT/CT for Bone Scintigraphy in Initial Staging of Cancer Patients	DTOM	Completed	No Results Available	Bone Metastases		Diagnostic impact of a systematic double SPECT/CT as compared to a oriented single-bed SPECT/CT bone scintigraphy for staging of malignancies with bone scintigraphy	University Hospital, Brest	All	18 Years and older (Adult, Older Adult)		102	Other	Observational	Observational Model: Cohort|Time Perspective: Retrospective	DTOM	2016-10-10	2016-12-10	2016-12-10	2017-11-27		2017-11-27	CHRU de Brest, Brest, France		https://ClinicalTrials.gov/show/NCT03353090
119	NCT03689439	Is Bone Scintigraphy Necessary in cT1N0M0 GGO Non-Small Cell Lung Cancer?	BSNTG	Recruiting	No Results Available	Bone Metastases	Diagnostic Test: bone scintigraphy	The Occurrence Rate of Bone metastasis in cT1N0M0 NSCLC patients	Fudan University	All	18 Years to 80 Years (Adult, Older Adult)		1000	Other	Observational	Observational Model: Cohort|Time Perspective: Prospective	BSNTG	2018-12-01	2021-11-01	2022-11-01	2018-09-28		2020-08-18	Anhui Chest Hospital, Hefei, An Hui, China|Henan Cancer Hospital, Zhengzhou, He Nan, China|Jiang Du People's Hospital, Yangzhou, Jiang Su, China|Fudan University Cancer Center, Shanghai, Shanghai, China|Jilin Cancer Hospital, Changchun, China		https://ClinicalTrials.gov/show/NCT03689439
120	NCT01428895	Femoral Bone Metastases		Recruiting	No Results Available	Cancer|Metastatic Malignant Neoplasm to Femur|Risk of Fracture	Procedure: Surgery Alone|Other: Combined Surgery and Radiation therapy	To describe the ambulatory status at 3 months by intervention (surgery ± radiotherapy, and radiotherapy alone group) - Ambulatory status|To describe patterns of management in patients with femoral metastases at high risk of pathological fracture - Perioperative Morbidity and Mortality for surgical patients; pain score and performance status; QOL|To describe patient and disease characteristics of …	University Health Network, Toronto	All	18 Years and older (Adult, Older Adult)	Not Applicable	180	Other	Interventional	Allocation: Non-Randomized|Intervention Model: Single Group Assignment|Masking: None (Open Label)|Primary Purpose: Other	OCREB 09-004	2023-03-09	2023-02-23	2023-02-23	2011-09-05		April 15, 2022	Mount Sinai Hospital, Toronto, Ontario, Canada|University Health Network, Princess Margaret Hospital, Toronto, Ontario, Canada		https://ClinicalTrials.gov/show/NCT01428895
121	NCT03284619	First-In Man (FIM) Study MR-Linac	FIM MR-Linac	Completed	No Results Available	Bone Metastases	Device: Magnetic resonance imager linear accelerator	Safety of the treatment system (a dose distribution accuracy = 5% will be considered acceptable). Incidence of acute toxicity (CTCAE grade 2 are higher) and incidence of Serious (unexpected) Adverse Events will be measured.|Geometrical accuracy of targeting by online MR imaging|Descriptive analysis of the clinical workflow by keeping a log book for the entire procedure.|Patients comfort	Nucletron Operations BV|Factory CRO for Medical Devices B.V.	All	18 Years and older (Adult, Older Adult)	Not Applicable	5	Industry|Other	Interventional	Allocation: N/A|Intervention Model: Single Group Assignment|Masking: None (Open Label)|Primary Purpose: Treatment	MR-Linac-CIP-001 Version 2.0|NL60984.041.17	April 1, 2017	2017-07-11	2017-09-08	2017-09-15		2018-03-29	University Medical Centre Utrecht, Utrecht, Netherlands		https://ClinicalTrials.gov/show/NCT03284619
122	NCT02673060	A Trial of MBC-11 in Patients With CIBD		Completed	No Results Available	Bone Metastasis	Drug: MBC-11	Incidence of Treatment-Emergent Adverse Events|Dose Limiting Toxicity [DLT]|Maximum tolerated dose|Maximum Plasma Concentration [Cmax] of MBC-11|Pharmacodynamic parameters|Fluorodeoxyglucose positron emission tomography-computed tomography [FDG PET-CT] response after cycle 2 and cycle 4 therapy|Maximum Plasma Concentration [Cmax] of etidronate|Maximum Plasma Concentration [Cmax] of ara-U|Peak tim…	Osteros Biomedica Ltd	All	18 Years and older (Adult, Older Adult)	Phase 1	16	Industry	Interventional	Allocation: N/A|Intervention Model: Single Group Assignment|Masking: None (Open Label)|Primary Purpose: Treatment	OB-MBC-01	2023-07-14	2023-11-15	2023-12-15	2016-02-03		2016-03-29			https://ClinicalTrials.gov/show/NCT02673060
123	NCT03071744	Lazanda in Cancer Patients Receiving Palliative Radiation		Terminated	Has Results	Bone Metastases	Drug: Lazanda	Number of Participants With Change in Patient Reported Positional Pain Intensity|Participants With Change in Patient Reported Positional Pain Severity Via the Brief Pain Inventory Short Form|Number of Participants With Adverse Effects Associated With Lazanda	Joseph Ma|University of California, San Diego	All	18 Years and older (Adult, Older Adult)	Phase 2	6	Other	Interventional	Allocation: N/A|Intervention Model: Single Group Assignment|Masking: None (Open Label)|Primary Purpose: Supportive Care	UCSD 161263	2017-03-01	2018-03-09	2018-03-09	2017-03-07	2019-07-23	2019-12-09	UCSD Moores Cancer Center, La Jolla, California, United States	"Study Protocol and Statistical Analysis Plan", https://ClinicalTrials.gov/ProvidedDocs/44/NCT03071744/Prot_SAP_000.pdf	https://ClinicalTrials.gov/show/NCT03071744
124	NCT03086824	A Safety Evaluation of MR-guided Focused Ultrasound Treatment for Palliative Pain Control of Bone Metastases		Unknown status	No Results Available	Magnetic Resonance Guided Interventional Procedures	Device: magnetic resonance-guided focused ultrasound	Treated-related Adverse Events|Change from baseline Quality of Life Questionnaire|Change from baseline Pain Score	Taipei Medical University Shuang Ho Hospital	All	20 Years to 99 Years (Adult, Older Adult)	Phase 4	20	Other	Interventional	Allocation: N/A|Intervention Model: Single Group Assignment|Masking: None (Open Label)|Primary Purpose: Treatment	TMU-SHH-2014-001	2014-12-12	2023-12-17		2017-03-22		2017-03-22	Department of Radiation Oncology, Taipei Medical University Hospital, Taipei, Taiwan		https://ClinicalTrials.gov/show/NCT03086824
125	NCT02358720	Single-fraction IMRT Versus External Beam Radiotherapy for Patients With Spine Bone Metastases	SMART	Unknown status	No Results Available	Pain	Radiation: Arm A|Radiation: Arm B	pain relief, as measured by visual analog scale (VAS)|quality of life measured on an EORTC BM22 questionnaire	Heidelberg University	All	18 Years to 80 Years (Adult, Older Adult)	Phase 1|Phase 2	60	Other	Interventional	Allocation: Randomized|Intervention Model: Parallel Assignment|Masking: None (Open Label)|Primary Purpose: Treatment	SMART	2023-12-14	2023-12-15	2023-12-16	2015-02-09		2015-02-09	Dept of Radiation Oncology, University of Heidelberg, Germany, Heidelberg, Germany		https://ClinicalTrials.gov/show/NCT02358720
126	NCT03408652	Efficacy and Safety of Systemic Treatments of Bone Metastases From Kidney Cancer in Patients Treated With Targeted Therapies	MOSCAR	Terminated	No Results Available	Metastatic Renal Cell Carcinoma	Drug: denosumab	Time to first Skeletal Related Event|Number of specific event-free survivals|Number of participants with treatment-related adverse events as assessed by CTCAE v4.0|Evolution of pain severity|Evolution of pain|Patient's condition evaluation|Overall survival|Evaluation of the different practices for bone metastases treatments|Cost-utility analysis|Cost-effectiveness analyses|Budget impact analysis	Centre Leon Berard	All	18 Years and older (Adult, Older Adult)	Phase 3	1	Other	Interventional	Allocation: Randomized|Intervention Model: Parallel Assignment|Masking: None (Open Label)|Primary Purpose: Supportive Care	MOSCAR|2017-004075-31	2019-03-15	2020-06-22	2020-06-22	2018-01-24		2021-10-22	Centre Leon Berard, Lyon, France		https://ClinicalTrials.gov/show/NCT03408652
127	NCT00656305	ExAblate (MRgFUS) Treatment of Metastatic Bone Tumors for the Palliation of Pain		Completed	Has Results	Bone Metastases|Multiple Myeloma	Device: ExAblate MRfFUS|Device: Sham	Number of Responders|Number of Participants With a Change in Medication Use|Quality of Life (QOL) as Measured by Change in Bodily Pain Inventory (BPI) From Baseline	InSightec	All	18 Years to 100 Years (Adult, Older Adult)	Not Applicable	147	Industry	Interventional	Allocation: Randomized|Intervention Model: Parallel Assignment|Masking: Single (Participant)|Primary Purpose: Treatment	BM004	2023-03-08	2023-09-12	2023-09-12	April 11, 2008	2018-11-14	2020-02-05	University of California San Diego, La Jolla, California, United States|Stanford University Medical Center, Stanford, California, United States|University MRI & Diagnostic Imaging Centers, Boca Raton, Florida, United States|Moffitt Cancer Center, Tampa, Florida, United States|Brigham and Women's Hospital, Boston, Massachusetts, United States|Weill Cornell Medical College, New York, New York, Unit…		https://ClinicalTrials.gov/show/NCT00656305
128	NCT00950911	Open Label Extension to SRE Studies in United Kingdom and Czech Republic Only		Completed	Has Results	Bone Metastases in Men With Hormone-Refractory Prostate Cancer|Bone Metastases in Subjects With Advanced Breast Cancer|Bone Metastases in Subjects With Advanced Cancer or Multiple Myeloma	Drug: amg 162	Number of Participants Survived	Amgen	All	18 Years and older (Adult, Older Adult)	Phase 3	35	Industry	Interventional	Allocation: N/A|Intervention Model: Single Group Assignment|Masking: None (Open Label)|Primary Purpose: Supportive Care	20080540	2023-07-09	2023-02-12	April 2012	2009-08-03	2014-02-11	2014-02-11	Research Site, Jindrichuv Hradec, Czech Republic|Research Site, Kromeriz, Czech Republic|Research Site, Olomouc, Czech Republic|Research Site, Praha 1, Czech Republic|Research Site, Praha 4, Czech Republic|Research Site, Praha 4, Czech Republic|Research Site, Praha 5, Czech Republic|Research Site, Praha 6, Czech Republic|Research Site, Zlin, Czech Republic|Research Site, Chichester, United Kingdo…		https://ClinicalTrials.gov/show/NCT00950911
129	NCT00688038	Correlation of MR Thermal Imaging to Actual Size of Ablation During Laser Ablation Therapy		Completed	No Results Available	Advanced Cancer|Bone Metastases	Procedure: Laser Ablation|Procedure: Magnetic Resonance Thermal Imaging	Correlation of Maximal Dimensions of 60-degree Celsius Isotherm Ablation Zone Dimensions as determined by MRI	M.D. Anderson Cancer Center|BioTex, Inc.	All	18 Years and older (Adult, Older Adult)	Phase 4	24	Other|Industry	Interventional	Allocation: N/A|Intervention Model: Single Group Assignment|Masking: None (Open Label)|Primary Purpose: Treatment	2007-0393|NCI-2011-00518	2008-05-13	2017-09-12	2017-09-12	2008-06-02		2017-09-15	University of Texas MD Anderson Cancer Center, Houston, Texas, United States		https://ClinicalTrials.gov/show/NCT00688038
130	NCT01129336	Effect of Zoledronic Acid as Anti-Cancer Treatment in Metastatic Breast Cancer Patients	MACS1295	Completed	Has Results	First or Second Line HER2-negative Breast Cancer|Metastatic Disease Without Bone Metastasis	Drug: Zoledronic acid|Drug: Standard Therapy	Number of Participants With Progression Free Survival (PFS)|Percentage of Patients With Circulating Tumor Cell Levels of at Least 5 Per 7.5 mL of Peripheral Blood by Month|Time to Progression (TTP)|Change From Baseline in Urine NTX by Month	Novartis Pharmaceuticals|Novartis	Female	18 Years and older (Adult, Older Adult)	Phase 4	44	Industry	Interventional	Allocation: Randomized|Intervention Model: Parallel Assignment|Masking: None (Open Label)|Primary Purpose: Treatment	CZOL446EUS147	2023-06-10	2023-08-12	2023-08-12	2010-05-24	2014-02-12	2014-05-20	Highlands Oncology Group, Fayetteville, Arkansas, United States|Clopton Clinic, Jonesboro, Arkansas, United States|Hematology Oncology Services of Arkansas, Little Rock, Arkansas, United States|Kaiser Permanente Medical Group Kaiser Permanente - Hawaii, Anaheim, California, United States|Wilshire Oncology Medical Group, La Verne, California, United States|Loma Linda University Loma Linda Cancer C…		https://ClinicalTrials.gov/show/NCT01129336
131	NCT03986593	Cryoablation of Bone Metastases From Endocrine Tumors		Active, not recruiting	No Results Available	Neoplasm Metastasis|Thyroid Neoplasm|Pheochromocytoma|Adrenal Neoplasm|Neuroendocrine Tumors|Bone Metastases	Device: cryoablation	change in the local disease status of the cryoablation treated bone metastases|evaluation of pain control|evaluation of quality of life|number of participants with treatment-related adverse events according to CTCAE 5.0|imaging evaluation (CT or MRI)|functional imaging evaluation (PET-CT)	Instituto do Cancer do Estado de São Paulo|University of Sao Paulo General Hospital	All	18 Years and older (Adult, Older Adult)	Not Applicable	30	Other	Interventional	Allocation: N/A|Intervention Model: Single Group Assignment|Masking: None (Open Label)|Primary Purpose: Treatment	990/2016	2019-09-26	2022-10-15	2023-06-15	2019-06-14		2022-09-15	Instituto do Cancer do Estado de São Paulo, São Paulo, Brazil		https://ClinicalTrials.gov/show/NCT03986593
132	NCT03612466	A Dose Finding Study of CycloSam® Combined With External Beam Radiotherapy		Suspended	No Results Available	Osteosarcoma|Bone Metastases	Drug: 153Sm-DOTMP|Radiation: External beam radiotherapy.|Drug: Calcium Carbonate|Drug: Mozobil|Drug: Neupogen Injectable Product	Maximally Tolerated Dose|Overall Survival|Time To Progression|Clinical Response Rate 30 days post treatment|Clinical Response Rate 4 months post treatment|Clinical Response Rate 8 months post treatment|Clinical Response Rate 12 months post treatment	Albert Einstein College of Medicine|National Cancer Institute (NCI)	All	15 Years to 65 Years (Child, Adult, Older Adult)	Phase 1	20	Other|NIH	Interventional	Allocation: N/A|Intervention Model: Single Group Assignment|Masking: None (Open Label)|Primary Purpose: Treatment	2018-8787|7R01CA163870-06	2023-08-22	2023-01-23	2023-09-24	2018-08-02		2022-06-07	Montefiore Medical Center-Children's Hospital, Bronx, New York, United States		https://ClinicalTrials.gov/show/NCT03612466
133	NCT04307914	Focused Ultrasound and RadioTHERapy for Noninvasive Palliative Pain Treatment in Patients With Bone Metastases	FURTHER	Recruiting	No Results Available	Bone Metastases|Bone Neoplasm|Bone Lesion|Bone Cancer|Pain|Cancer Induced Bone Pain|Quality of Life|Tumor|Neoplasm Metastasis	Radiation: External beam radiotherapy|Procedure: MR-HIFU	Pain response - 14 days after completion of treatment|Pain response - 14 days after inclusion|Patient reported pain scores - patient pain diary|Patient reported pain scores - BPI|Physician reported toxicity - CTCAE 5.0|Patient reported quality of life - EORTC BM22|Patient reported quality of life - EORTC C15-PAL|Patient reported quality of life - EQ-5D-5L|Patient reported quality of life - PGIC|P…	UMC Utrecht|Turku University Hospital|Universitätsklinikum Köln|University of Roma La Sapienza|Istituto Ortopedico Rizzoli|University of Bologna|Isala	All	18 Years and older (Adult, Older Adult)	Phase 3	216	Other	Interventional	Allocation: Randomized|Intervention Model: Parallel Assignment|Masking: None (Open Label)|Primary Purpose: Treatment	NL71303.041.19	2020-03-10	2024-01-01	2024-06-01	2020-03-13		2020-03-13	TUCH Turku, Turku, Finland|University Hospital Cologne, Cologne, Germany|IOR, Bologna, Italy|CSSP, Roma, Italy|University Medical Center Utrecht, Utrecht, Netherlands|Isala Klinieken Zwolle, Zwolle, Netherlands		https://ClinicalTrials.gov/show/NCT04307914
134	NCT02747173	Assessment of Bone Biomarkers for TKI Response in RCC With Bone Metastases, HRQoL and Comparison of Imaging Techniques	METHEOS	Terminated	No Results Available	Renal Cell Carcinoma		Assess bone biomarkers in response to TKI|Progression free survival|Objective response rate|Measurements in time of bone metastases in RCC using whole body magnetic resonance and bone scintigraphy|Change and correlation of magnetic resonance and CT results in the assessment of global disease response to TKI. Using RECIST and MASS criteria|Quality of life of patients with RCC and bone metastases t…	Spanish Oncology Genito-Urinary Group|Pfizer	All	18 Years and older (Adult, Older Adult)		4	Other|Industry	Observational	Observational Model: Cohort|Time Perspective: Prospective	SOG-ANG-2014-01	2023-10-15	April 2018	April 2018	April 21, 2016		April 26, 2018	Hospital Universitario central de Asturias, Oviedo, Asturias, Spain|Hospital de Donostia, San Sebastián, Guipuzcoa, Spain|Complejo Hospitalario Univ de Santiago de Compostela, Santiago de Compostela, La Coruña, Spain|Hospital de Navarra, Pamplona, Navarra, Spain|Complejo Hospitalario Univ de Vigo, Vigo, Pontevedra, Spain|Consorcio Hospitalario Parc Tauli, Barcelona, Spain|Complejo Hospitalario de…		https://ClinicalTrials.gov/show/NCT02747173
135	NCT04310410	Feasibility of Combined Focused Ultrasound and Radiotherapy Treatment in Patients With Painful Bone Metastasis	PRE-FURTHER	Unknown status	No Results Available	Bone Metastases|Bone Neoplasm|Bone Lesion|Bone Cancer|Pain|Cancer Induced Bone Pain|Radiation Toxicity|Quality of Life|Tumor|Neoplasm Metastasis	Combination Product: combined radiotherapy and MR-HIFU	Feasibility of combined treatment with EBRT and MR-HIFU - Patient tolerance: questionnaire|Feasibility of combined treatment with EBRT and MR-HIFU - hospital logistics|Patient reported pain scores.|(Serious) adverse events (CTCAE)	UMC Utrecht|Isala	All	18 Years and older (Adult, Older Adult)	Phase 1|Phase 2	10	Other	Interventional	Intervention Model: Sequential Assignment|Masking: None (Open Label)|Primary Purpose: Other	NL68441.041.19	April 11, 2019	April 1, 2020	2020-06-01	2020-03-17		2020-03-17	Isala Klinieken Zwolle, Zwolle, Overijsel, Netherlands|University Medical Center Utrecht, Utrecht, Netherlands	"Study Protocol and Statistical Analysis Plan", https://ClinicalTrials.gov/ProvidedDocs/10/NCT04310410/Prot_SAP_000.pdf	https://ClinicalTrials.gov/show/NCT04310410
136	NCT05241132	Tislelizumab Combined With Chemotherapy in the Treatment of Bone Metastases of Unknown Primary		Recruiting	No Results Available	Cancer of Unknown Primary|Bone Cancer Metastatic|Tislelizumab|Gene Mutation-Related Cancer|Immune Evasion, Tumor|Chemotherapy Effect	Drug: Tislelizumab plus chemotherapy	Complete Response(CR) and Partial Response(PR) in all participants according to RECIST,v1.1|Disease control rate(DCR)according to RECIST,v1.1|Duration of remission (DOR) by Kaplan-Meier|Progression Free Survival (PFS) by Kaplan-Meier|Overall survival (OS) by Kaplan-Meier|The median of Progression Free Survival (PFS) by Kaplan-Meier|The median of overall survival (OS) by Kaplan-Meier|Stratified an…	Wei Xu|Shanghai Changzheng Hospital	All	18 Years and older (Adult, Older Adult)	Phase 2	27	Other	Interventional	Allocation: N/A|Intervention Model: Single Group Assignment|Masking: None (Open Label)|Primary Purpose: Treatment	2021SL047	2021-11-12	2023-06-30	2024-10-31	2022-02-15		2022-02-15	ChangZheng Hospital, Shanghai, Shanghai, China		https://ClinicalTrials.gov/show/NCT05241132
137	NCT01015560	S0916, MLN1202 in Treating Patients With Bone Metastases		Completed	Has Results	Metastatic Cancer|Unspecified Adult Solid Tumor, Protocol Specific	Drug: anti-CCR2 monoclonal antibody MLN1202|Genetic: polymorphism analysis|Other: laboratory biomarker analysis	uNTX Response Rate at 43 Days	Southwest Oncology Group|National Cancer Institute (NCI)	All	18 Years to 120 Years (Adult, Older Adult)	Phase 2	44	Other|NIH	Interventional	Allocation: N/A|Intervention Model: Single Group Assignment|Masking: None (Open Label)|Primary Purpose: Treatment	S0916|U10CA032102	2023-03-10	2023-12-12	2023-12-12	2009-11-18	2014-05-28	2018-08-09	Glendale Memorial Hospital Comprehensive Cancer Center, Glendale, California, United States|USC/Norris Comprehensive Cancer Center and Hospital, Los Angeles, California, United States|Cardinal Bernardin Cancer Center at Loyola University Medical Center, Maywood, Illinois, United States|St. Francis Hospital and Health Centers - Beech Grove Campus, Beech Grove, Indiana, United States|Reid Hospital …		https://ClinicalTrials.gov/show/NCT01015560
138	NCT01927939	18F-FDG PET Metabolic Phenotype in Evaluating Therapeutic Response for Breast Cancer Patients With Bone Metastases.		Unknown status	No Results Available	Breast Cancer|18F-FDG PET		The uptake of 18F-FDG PET.	National Taiwan University Hospital	Female	20 Years to 90 Years (Adult, Older Adult)		100	Other	Observational	Observational Model: Case-Only|Time Perspective: Prospective	201207002MIB	2023-10-12	2023-08-14	2023-08-14	2013-08-23		April 15, 2014	National Taiwan University Hospital, Taipei, Taiwan		https://ClinicalTrials.gov/show/NCT01927939
139	NCT02758132	Denosumab Plus Enzalutamide, Abiraterone and Prednisone Compared to Denosumab Plus Enzalutamide Alone for Men With Castrate Resistant Prostate Cancer (CRPC) With Bone Metastases		Terminated	Has Results	Prostate Cancer	Biological: Denosumab|Drug: Enzalutamide|Drug: Abiraterone|Drug: Prednisone	Measure Change in Serum-based Metabolites Associated With Bone Deposition, Growth and Turnover in Patients Who Have CRPC With Clinical Evidence of Metastatic Disease to the Bone, All Using Gas Chromatography-time-of-flight Mass Spectrometry (GC-TOFMS).|Measure Time (Months) to Skeletal Related Event (SRE) of Patients on Therapy|Measure Time (Months) to Progression-free Survival of Patients on The…	University of Hawaii	Male	18 Years and older (Adult, Older Adult)	Phase 2	1	Other	Interventional	Allocation: Non-Randomized|Intervention Model: Parallel Assignment|Masking: None (Open Label)|Primary Purpose: Treatment	Rosser 2015-1	2016-03-01	2016-09-06	2016-09-06	2016-05-02	2019-10-02	2019-11-08	University of Hawaii Cancer Center, Honolulu, Hawaii, United States		https://ClinicalTrials.gov/show/NCT02758132
140	NCT02125630	Bone Metastasis and Surgery in Breast Cancer		Completed	No Results Available	Breast Cancer|Surgery	Procedure: Surgery|Drug: Systemic therapy	Overall survival|Locoregional progression	Federation of Breast Diseases Societies	Female	20 Years to 80 Years (Adult, Older Adult)		460	Other	Observational	Observational Model: Cohort|Time Perspective: Prospective	BOMET MF14-01|PROTOCOL BOMET MF14-01	2023-01-14	2023-06-19	2023-06-19	April 29, 2014		2019-07-31	Istanbul University Medical faculty, Istanbul, Turkey		https://ClinicalTrials.gov/show/NCT02125630
141	NCT02390934	Efficacy of Radium 223 in Radioactive Iodine Refractory Bone Metastases From Differentiated Thyroid Cancer	RAD-THYR	Completed	No Results Available	Thyroid Cancer	Radiation: Radium 223	Metabolic response (PERCIST criteria)|Pain response (numerical rating scale)|Partial pain response (improvement =30% and <50% pain score)|ECOG performance status|Changes in Quality of life (QLQ-C30 and QLQ-BM22 questionnaires)|Time to occurrence of first skeletal-related events|Overall survival	Gustave Roussy, Cancer Campus, Grand Paris	All	18 Years and older (Adult, Older Adult)	Phase 2	13	Other	Interventional	Allocation: N/A|Intervention Model: Single Group Assignment|Masking: None (Open Label)|Primary Purpose: Treatment	2014-001070-34|2014/2110	2014-10-01	April 2, 2019	April 2, 2019	2015-03-18		2019-06-11	Gustave Roussy, Villejuif, Val De Marne, France		https://ClinicalTrials.gov/show/NCT02390934
142	NCT00128297	Pamidronate Administration in Breast Cancer Patients With Bone Metastases		Completed	No Results Available	Breast Cancer|Neoplasm Metastasis	Drug: Pamidronate	Pamidronate efficacy to prevent first skeletal event: time until the appearance of the first skeletal event|Number of skeletal events per treatment arm|Quality of life: Short Form (SF)-36 questionnaire|Overall survival (OS)	Spanish Breast Cancer Research Group|Novartis	Female	18 Years and older (Adult, Older Adult)	Phase 4	152	Other|Industry	Interventional	Allocation: Randomized|Intervention Model: Parallel Assignment|Masking: None (Open Label)|Primary Purpose: Other	GEICAM 2000-01	2000-10-18	2004-06-04	2004-06-04	2005-08-09		2019-07-31	Spanish Breast Cancer Research Group (GEICAM), San Sebastián de los Reyes, Madrid, Spain		https://ClinicalTrials.gov/show/NCT00128297
143	NCT02518698	Treatment Patterns in Castrate Resistant Prostate Cancer Patients With Bone Metastases in a Medicare Population		Completed	No Results Available	Prostate Cancer	Drug: Radium-223 dichloride (Xofigo, BAY88-8223)	Overall survival of mCRPC patients|Number of skeletal related events (SREs) of the mCRPC patients|Type of skeletal related events (SREs) of the mCRPC patients|Number of patients with mCRPC with bone metastases|Type of treatments associated with mCRPC|Duration for each treatment identified|Distribution of providers by treatment|Clinical and demographic characteristics of the mCRPC patients|Treatme…	Bayer	Male	55 Years to 88 Years (Adult, Older Adult)		1163	Industry	Observational	Observational Model: Cohort|Time Perspective: Retrospective	18273	2015-08-31	2017-09-30	2017-09-30	2015-08-10		2018-09-18	Louisville, Kentucky, United States		https://ClinicalTrials.gov/show/NCT02518698
144	NCT00104104	A Multiple Myeloma Trial in Patients With Bone Metastases		Completed	Has Results	Multiple Myeloma	Drug: zoledronic acid	The Number of Participants With a Significant Increase in Serum Creatinine at 12 Months|The Number of Participants With Disease Progression|The Number of Participants With a Significant Increase in Serum Creatinine at 24 Months|Time to First Significant Increase in Serum Creatinine|Zoledronic Acid Concentrations	Novartis Pharmaceuticals|Novartis	All	18 Years and older (Adult, Older Adult)	Phase 4	179	Industry	Interventional	Allocation: Randomized|Intervention Model: Parallel Assignment|Masking: None (Open Label)|Primary Purpose: Treatment	CZOL446EUS97|US97	2023-10-04	2023-10-07	2023-10-07	2005-02-23	2011-06-06	2011-06-29	Hematology Oncology Specialists, Huntsville, Alabama, United States|Palo Verde Hematology Oncology, Glendale, Arizona, United States|US Oncology, Tucson, Arizona, United States|Myeloma Institute For Research Therapy, Little Rock, Arkansas, United States|University of Arkansas, Little Rock, Arkansas, United States|Pacific Cancer Medical Center, Anaheim, California, United States|Comprehensive Bloo…		https://ClinicalTrials.gov/show/NCT00104104
145	NCT00372710	Safety/Efficacy of Intravenous Zoledronic Acid When Added to Standard Therapies in Patients With Breast Cancer and Metastatic Bone Lesions		Terminated	No Results Available	Breast Cancer With Bone Metastasis	Drug: Zoledronic acid	Efficacy of a switch over from pamidronate therapy (2 infusions) to a treatment with zoledronic acid 4mg every 4 weeks (10 infusions) for 44 weeks in patients with breast cancer-related bone lesions|Comparison of the safety, tolerability, and efficacy in the treatment arms	Novartis	Female	18 Years and older (Adult, Older Adult)	Phase 3	30	Industry	Interventional	Allocation: Non-Randomized|Intervention Model: Single Group Assignment|Masking: None (Open Label)|Primary Purpose: Treatment	CZOL446EDE03	2023-08-02			2006-09-07		2009-11-23	Freiburg, Germany		https://ClinicalTrials.gov/show/NCT00372710
146	NCT03661892	Pilot, Syndros, Decreasing Use of Opioids in Breast Cancer Subjects With Bone Mets		Completed	No Results Available	Bone Metastases|Breast Cancer|Pain	Drug: Syndros	Need for opiate pain medication|Change in pain|Change in quality of life|Change in bone modulation	University of Arizona	All	21 Years and older (Adult, Older Adult)	Early Phase 1	14	Other	Interventional	Allocation: N/A|Intervention Model: Single Group Assignment|Masking: None (Open Label)|Primary Purpose: Treatment	1808852902|NCI-2018-01916	2018-12-19	2020-10-30	April 26, 2021	2018-09-07		April 29, 2021	University of Arizona, Tucson, Arizona, United States		https://ClinicalTrials.gov/show/NCT03661892
147	NCT01842048	Comparing the Effectiveness of Combined Hyperthermia and External Beam Radiation (EBRT) Versus EBRT Alone in Treating Patients With Painful Bone Metastases		Unknown status	No Results Available	All Type of Cancers With Bony Metastasis	Other: Hyperthermia|Radiation: External-beam radiotherapy	Complete response rate|Adverse events|Tumor response|Pain relief|Quality-of-life	Shin Kong Wu Ho-Su Memorial Hospital	All	21 Years to 80 Years (Adult, Older Adult)	Phase 3	152	Other	Interventional	Allocation: Randomized|Intervention Model: Parallel Assignment|Masking: None (Open Label)|Primary Purpose: Supportive Care	20120305D	2023-07-13	2023-06-19	2023-06-19	April 29, 2013		2016-10-13	Shin Kong Wu Ho-Su Memorial Hospital, Taipei, Taiwan		https://ClinicalTrials.gov/show/NCT01842048
148	NCT02900118	Imaging Evaluation of the Therapeutic Response of Breast Cancer Bone Metastasis (EMOS)		Completed	No Results Available	Breast Cancer		Evaluation of the therapeutic response.|Evaluation of the concordance of the Apparent Diffusion Coefficient (ADC) and the Standardized Uptake Value (SUV).|Evaluation of the consistency in the detection of lesions.|Evaluation of the criteria PERCIST (PET Response Criteria in Solid Tumors)|Evaluation of the criteria MDA (Minimal Disease Activity)|Evaluation of the criteria EORTC (European Organisat…	Centre Oscar Lambret	All	18 Years and older (Adult, Older Adult)		28	Other	Observational	Observational Model: Cohort|Time Perspective: Prospective	EMOS-1207	2023-08-12	2023-07-13	2023-10-13	2016-09-14		2016-09-14	Centre Oscar Lambret, Lille, France		https://ClinicalTrials.gov/show/NCT02900118
149	NCT00080912	Single vs Multiple-Fraction Therapy in Treating Patients With Previously Irradiated Painful Bone Metastases		Completed	Has Results	Metastatic Cancer|Pain	Radiation: radiation therapy	Pain Relief Measured by the Brief Pain Inventory at 2 Months After Treatment	NCIC Clinical Trials Group|National Cancer Institute (NCI)|Radiation Therapy Oncology Group|Trans Tasman Radiation Oncology Group|Cancer Research UK|Assistance Publique - Hôpitaux de Paris|Canadian Cancer Trials Group	All	18 Years and older (Adult, Older Adult)	Not Applicable	850	Other|NIH	Interventional	Allocation: Randomized|Intervention Model: Parallel Assignment|Masking: None (Open Label)|Primary Purpose: Treatment	SC20|CAN-NCIC-SC20|RTOG-0433|TROG-03.08|CDR0000357423	2004-01-07	April 10, 2013	2014-01-16	April 8, 2004	2015-02-26	April 14, 2020	Tom Baker Cancer Centre, Calgary, Alberta, Canada|The Vitalite Health Network - Dr. Leon Richard, Moncton, New Brunswick, Canada|Juravinski Cancer Centre at Hamilton Health Sciences, Hamilton, Ontario, Canada|Cancer Centre of Southeastern Ontario at Kingston, Kingston, Ontario, Canada|Grand River Regional Cancer Centre, Kitchener, Ontario, Canada|Thunder Bay Regional Health Science Centre, Thunde…		https://ClinicalTrials.gov/show/NCT00080912
150	NCT04494373	Comparing of the Pharmacokinetic, Pharmacodynamic, Safety and Immunogenicity of HS-20090 and Xgeva® in Healthy Adults		Unknown status	No Results Available	Bone Metastasis From Solid Tumors	Drug: HS-20090|Drug: Xgeva®	Area under the plasma concentration-time curve (AUC0-t )|Cmax|Adverse events(AE)|Serum type 1 C-telopeptide(CTX1)	Jiangsu Hansoh Pharmaceutical Co., Ltd.	Male	18 Years to 50 Years (Adult)	Phase 1	154	Industry	Interventional	Allocation: Randomized|Intervention Model: Parallel Assignment|Masking: Double (Participant, Investigator)|Primary Purpose: Prevention	HS-20090-101	2020-09-01	2021-06-30	2021-06-30	2020-07-31		2020-08-04			https://ClinicalTrials.gov/show/NCT04494373
151	NCT02718404	3 Tesla Magnetic Resonance Guided High Intensity Focused Ultrasound in the Treatment of Pain From Bone Metastases of Solid Tumors	HIFU-Bone	Terminated	No Results Available	Solid Tumors	Procedure: MR-HIFU Treatment|Drug: MR contrast media and medications|Procedure: MR images	Pain response|Time to pain palliation|Time to pain progression|Duration of pain palliation|Recording of pain medication|Quality of Life on the EORTC-QLQ-C15-PAL scale12|Local Tumor Control|Side effects|reduction/increase of tumor markers|identification of the brain regions involved in oncological pain	Istituto Scientifico Romagnolo per lo Studio e la cura dei Tumori	All	18 Years and older (Adult, Older Adult)	Not Applicable	12	Other	Interventional	Allocation: N/A|Intervention Model: Single Group Assignment|Masking: None (Open Label)|Primary Purpose: Treatment	IRST198.01	2015-09-14	2018-07-04	2018-08-27	2016-03-24		2022-06-30	Centro di Osteoncologia e Tumori Rari (CDO-TR) IRCCS Istituto Scientifico Romagnolo per lo Studio e la Cura dei Tumori (IRST) S.r.l, Meldola, FC, Italy		https://ClinicalTrials.gov/show/NCT02718404
152	NCT03305224	The Combination Therapy With Ra-223 and Enzalutamide	CORE-OCU	Active, not recruiting	No Results Available	Castration-resistant Prostate Cancer|Bone Metastases	Drug: Ra-223 in combination with enzalutamide	Changes in Alkaline phosphatase (ALP)|Tolerability of Radium-223 therapy|Evaluation for bone metastasis by 18F-NaF-PET|Evaluation for bone metastasis by bone scintigraphy|Overall Survival Rate|Time to occurrence of Symptomatic Skeletal-related Events (SSEs)|Time to occurrence of visceral metastasis|Time to initiation of cytotoxic chemotherapy|Changes in Prostate Specific Antigen (PSA)|Changes Fro…	Taro Iguchi, MD, PHD|Bayer Yakuhin, Ltd.|Osaka City University	Male	20 Years and older (Adult, Older Adult)	Phase 2	10	Other|Industry	Interventional	Allocation: N/A|Intervention Model: Single Group Assignment|Masking: None (Open Label)|Primary Purpose: Treatment	CORE-OCU	2017-10-27	2021-10-30	2022-03-31	2017-10-09		2021-09-09	Osaka City University Graduate School of Medicine, Osaka, Japan		https://ClinicalTrials.gov/show/NCT03305224
153	NCT00956163	Whole Body Fluorine F 18 Sodium Fluoride PET/CT Scan and Whole Body MRI in Finding Bone Metastases in Patients With Prostate Cancer		Completed	No Results Available	Bone Metastases|Recurrent Prostate Cancer|Stage I Prostate Cancer|Stage IIA Prostate Cancer|Stage IIB Prostate Cancer|Stage III Prostate Cancer|Stage IV Prostate Cancer	Procedure: magnetic resonance imaging|Radiation: fluorine F 18 sodium fluoride|Procedure: positron emission tomography|Procedure: computed tomography|Radiation: technetium Tc 99m methylene diphosphonate|Other: laboratory biomarker analysis	Uptake of fluorine F 18 sodium fluoride on PET/CT scan|Incidence of focal MRI abnormality	National Cancer Institute (NCI)	Male	18 Years and older (Adult, Older Adult)	Early Phase 1	50	NIH	Interventional	Allocation: N/A|Intervention Model: Single Group Assignment|Masking: None (Open Label)|Primary Purpose: Diagnostic	NCI-2011-02972|CDR0000666327|MGH-09364|09-364|8336|P30CA006516|N01CM37120	2023-03-10	2023-01-11	2023-05-14	2009-08-11		2014-07-02	Massachusetts General Hospital Cancer Center, Boston, Massachusetts, United States		https://ClinicalTrials.gov/show/NCT00956163
154	NCT00712712	Morphine After Radiofrequency Ablation of Painful Bone Metastases in Patients With Cancer	MEDOR	Completed	Has Results	Metastatic Cancer|Pain|Unspecified Adult Solid Tumor, Protocol Specific	Drug: Acetaminophen|Drug: Morphine Sulfate|Other: Questionnaire administration|Procedure: Quality-of-life assessment|Procedure: Radiofrequency ablation	Percentage of Participants With Maximum Pain Level Decreased by = 2 Points at 2 Months After Radiofrequency Ablation (RFA)|Difference in Maximum Pain Scores Between Inclusion and 2 Months After Radiofrequency Ablation|Intensity of Pain (Minimum, Average, Maximum)|Oral Morphine Consumption or Oral Morphine Equivalent (Immediate and Sustained Release Forms) (mg) Per Day|Total Intravenous Morphine D…	Institut Bergonié	All	18 Years to 75 Years (Adult, Older Adult)	Phase 2	78	Other	Interventional	Allocation: N/A|Intervention Model: Single Group Assignment|Masking: None (Open Label)|Primary Purpose: Supportive Care	CDR0000589594|IB-MEDOR|IB-2007-16|INCA-RECF0498|2007-002686-13	2007-12-24	2016-02-11	2016-03-16	2008-07-10	2021-03-26	2021-03-26	Institute Bergonié, Bordeaux, France		https://ClinicalTrials.gov/show/NCT00712712
155	NCT01998607	Survey of XGEVA® Presrcibers in Europe to Evaluate Their Knowledge of the Summary of Product Characteristics Pertaining to Osteonecrosis of the Jaw		Completed	No Results Available	Solid Tumours|Bone Metastasis	Other: Physician Survey	Proportion of participating oncology practitioners prescribing XGEVA® who are aware of the SPC statements pertaining to ONJ (each question pertaining to a SPC statement will be assessed seperately at the end of each survey round)	Amgen	All	Child, Adult, Older Adult		420	Industry	Observational	Observational Model: Other|Time Perspective: Cross-Sectional	20110102	2013-02-04	2015-05-15	2015-05-15	2013-12-02		2018-01-09			https://ClinicalTrials.gov/show/NCT01998607
156	NCT01810770	Radium-223 Dichloride Asian Population Study in the Treatment of CRPC Patients With Bone Metastasis		Completed	No Results Available	Prostatic Neoplasms	Drug: Radium-223 dichloride (Xofigo, BAY88-8223)	Number of participants with adverse events as a measure of safety and tolerability|Number of participants with laboratory changes|Number of participants with changes in vital signs|Number of participants with changes in electrocardiogram (ECG)|Overall Survival (OS)|Changes in total Alkaline Phosphate (ALP) in serum|Number of participants with total-ALP normalization|Time to total ALP progression|…	Bayer	Male	18 Years and older (Adult, Older Adult)	Phase 3	243	Industry	Interventional	Allocation: N/A|Intervention Model: Single Group Assignment|Masking: None (Open Label)|Primary Purpose: Treatment	15397	2013-03-26	2017-09-25	2017-09-25	2013-03-14		2018-09-19	Guangzhou, Guangdong, China|Guangzhou, Guangdong, China|Nanjing, Jiangsu, China|Nanjing, Jiangsu, China|Beijing, China|Beijing, China|Beijing, China|Beijing, China|Beijing, China|Guangzhou, China|Shanghai, China|Shanghai, China|Shanghai, China|Shanghai, China|Shanghai, China|Donggu,, Gwangju Gwang''yeogsi, Korea, Republic of|Seoul, Korea, Republic of|Seoul, Korea, Republic of|Seoul, Korea, Republ…		https://ClinicalTrials.gov/show/NCT01810770
157	NCT01419717	Open-Label Access Protocol of Denosumab for Subjects With Advanced Cancer		Completed	Has Results	Bone Metastases in Men With Hormone-Refractory Prostate Cancer|Bone Metastases in Subjects With Advanced Breast Cancer	Drug: Denosumab	Number of Participants With Adverse Events|Number of Participants With Anti-denosumab Binding Antibodies	Amgen	All	18 Years and older (Adult, Older Adult)	Phase 3	129	Industry	Interventional	Allocation: N/A|Intervention Model: Single Group Assignment|Masking: None (Open Label)|Primary Purpose: Treatment	20110113	2011-11-22	2018-08-10	2018-08-10	2011-08-18	2019-09-09	2019-09-24	Research Site, Capital Federal, Buenos Aires, Argentina|Research Site, Quilmes, Buenos Aires, Argentina|Research Site, Cordoba, Córdoba, Argentina|Research Site, Rosario, Santa Fe, Argentina|Research Site, Wien, Austria|Research Site, Namur, Belgium|Research Site, Porto Alegre, Rio Grande Do Sul, Brazil|Research Site, Porto Alegre, Rio Grande Do Sul, Brazil|Research Site, Santo Andre, São Paulo, …	"Study Protocol", https://ClinicalTrials.gov/ProvidedDocs/17/NCT01419717/Prot_000.pdf|"Statistical Analysis Plan", https://ClinicalTrials.gov/ProvidedDocs/17/NCT01419717/SAP_001.pdf	https://ClinicalTrials.gov/show/NCT01419717
158	NCT00026247	Radiofrequency Ablation in Treating Patients With Bone Metastases	ACRIN-6661	Completed	No Results Available	Metastatic Cancer|Pain|Unspecified Adult Solid Tumor, Protocol Specific	Procedure: pain therapy|Procedure: radiofrequency ablation	Adverse events|Pain intensity|Pain reduction|Mood|Pain Severity	American College of Radiology Imaging Network|National Cancer Institute (NCI)	All	21 Years to 120 Years (Adult, Older Adult)	Not Applicable	66	Other|NIH	Interventional	Allocation: N/A|Intervention Model: Single Group Assignment|Masking: None (Open Label)|Primary Purpose: Treatment	CDR0000069012|ACRIN-6661|U01CA080098|U01CA079778	2023-11-01	2010-02-15	2010-02-15	2003-01-27		2019-07-05	Comprehensive Cancer Center at University of Alabama at Birmingham, Birmingham, Alabama, United States|UMASS Memorial Cancer Center - University Campus, Worcester, Massachusetts, United States|Mallinckrodt Institute of Radiology at Washington University Medical Center, Saint Louis, Missouri, United States|Radiology Consultants, Incorporated, Youngstown, Ohio, United States|Abramson Cancer Center …		https://ClinicalTrials.gov/show/NCT00026247
159	NCT00172003	Effect of Zoledronic Acid in Patients With Renal Cell Cancer and Bone Metastasis		Completed	No Results Available	Renal Cell Cancer|Neoplasm Metastasis	Drug: Zoledronic acid	Rate of skeletal complications|Time to first skeletal complication|Bone pain|Time to overall progression of disease|Overall survival|Bone turnover parameters	Novartis Pharmaceuticals|Novartis	All	18 Years and older (Adult, Older Adult)	Phase 4	50	Industry	Interventional	Allocation: N/A|Intervention Model: Single Group Assignment|Masking: None (Open Label)|Primary Purpose: Treatment	CZOL446EDE15	2023-09-04	2023-07-09	2023-07-09	2005-09-15		2016-11-18	Novartis investigative Site, Offenbach, Germany		https://ClinicalTrials.gov/show/NCT00172003
160	NCT03738670	Bipolar RFA of Painful Extra-spinal Bone Metastases	PERFACOOL	Recruiting	No Results Available	Multi-metastatic Cancer	Procedure: Percutaneous RFA	Percentage of responding patients reporting an improvement of at least 3 points on item 3 "the worst pain in the last 24 hours" of Brief Pain Inventory (BPI) questionnaire|Comparison of the mean scores of the items 3, 5, 9B and 8 of the BPI questionnaire between the baseline and 6-month follow-up|Safety will be assessed according to SIR(11) / CTCAE classification|Mean scores variation of the morp…	University Hospital, Strasbourg, France	All	18 Years and older (Adult, Older Adult)	Not Applicable	65	Other	Interventional	Allocation: N/A|Intervention Model: Single Group Assignment|Masking: None (Open Label)|Primary Purpose: Prevention	7010	2019-06-12	2023-01-24	2023-07-24	2018-11-13		2022-07-08	University Hospital, Strasbourg, france, Strasbourg, France		https://ClinicalTrials.gov/show/NCT03738670
161	NCT00168129	Helical Tomotherapy as a Radiotherapy Technique for Treating Bone Metastases		Completed	No Results Available	Bone Neoplasms	Procedure: Helical tomotherapy	To deliver a single fraction of radiotherapy safely to patients with bone metastases using helical tomotherapy|To assess and quantify the acute toxicity of patients with bone metastases treated with helical tomotherapy.|To measure invivo dosimetry and compare delivered doses to computer-reconstructed dose distribution.|To determine the maximum tolerated does of palliative radiation give with heli…	Alberta Health services|AHS Cancer Control Alberta	All	18 Years and older (Adult, Older Adult)	Phase 1	10	Other	Interventional	Allocation: Non-Randomized|Intervention Model: Single Group Assignment|Masking: None (Open Label)|Primary Purpose: Treatment	NA-15-0007	2023-06-01		2023-07-05	2005-09-15		2011-12-09	Cross Cancer Institute, Edmonton, Alberta, Canada		https://ClinicalTrials.gov/show/NCT00168129
162	NCT03416959	Bone Metastases Database of Patients Treated Surgically for Impending or Pathologic Fracture of Long Bones	BMD	Recruiting	No Results Available	Neoplasm Metastasis	Procedure: intramedullary fixation or endoprosthetic reconstruction	Clinical outcomes after treatment of long bone metastases with intramedullary nail versus endoprosthetic reconstruction|Survival in patients undergoing surgery for metastatic bone disease	Istituto Ortopedico Rizzoli	All	Child, Adult, Older Adult		120	Other	Observational	Observational Model: Case-Only|Time Perspective: Prospective	12807	2018-01-01	2026-12-31	2026-12-31	2018-01-31		2022-03-02	Istituto Ortopedico Rizzoli, Bologna, Italy		https://ClinicalTrials.gov/show/NCT03416959
163	NCT00242554	Open-label Phase IV Clinical Trial to Evaluate the Safety and Tolerability of Zoledronic Acid in Patients With Prostate Cancer and Bone Metastases		Completed	No Results Available	Prostate Cancer	Drug: Zoledronic acid	To evaluate the tolerability and safey of zoledronic acid 4mg, IV, for the following eficacy metrics: QoL, Safety (Aes) and evaluation of pain|No secondary outcomes/objectives planned	Novartis Pharmaceuticals|Novartis	Male	18 Years to 80 Years (Adult, Older Adult)	Phase 4	150	Industry	Interventional	Allocation: Non-Randomized|Intervention Model: Single Group Assignment|Masking: None (Open Label)|Primary Purpose: Treatment	CZOL446EMX01	2023-10-02	2023-07-07		2005-10-20		2017-02-23			https://ClinicalTrials.gov/show/NCT00242554
164	NCT03455231	Short Course Radiotherapy in Complicated Bone Metastases Palliation		Completed	No Results Available	Palliative Care	Radiation: Short course radiotherapy	Maximum tolerated dose|Acute toxicity|Quality of life|Pain relief|Late toxicity	IRCCS Azienda Ospedaliero-Universitaria di Bologna	All	18 Years and older (Adult, Older Adult)	Not Applicable	45	Other	Interventional	Allocation: N/A|Intervention Model: Single Group Assignment|Masking: None (Open Label)|Primary Purpose: Treatment	SHARON-BONE	2009-01-01	2017-01-01	2017-01-01	2018-03-06		2018-03-12			https://ClinicalTrials.gov/show/NCT03455231
165	NCT03847220	Study of the Utility of the BOMET-QOL Questionnaire Patients With Breast Cancer and Bone Metastasis	MAbomet	Completed	No Results Available	Breast Carcinoma Metastatic to the Bone	Diagnostic Test: BOMET-QoL questionnaire	Impact on the HRQoL|Measurement properties of the BOMET-QoL questionnaire: validity|Measurement properties of the BOMET-QoL questionnaire: feasibility|Measurement properties of the BOMET-QoL questionnaire: sensitivity to change|Impact of skeletal-related events (SREs) on HRQoL (BOMET-QoL scores)|Relation between Eastern Cooperative Oncology Group (ECOG) and HRQoL (BOMET-QoL scores).|Correlation b…	Spanish Breast Cancer Research Group|Novartis Pharmaceuticals	Female	18 Years and older (Adult, Older Adult)		241	Other|Industry	Observational	Observational Model: Case-Only|Time Perspective: Prospective	Mabomet	2007-10-23	2010-05-20	2012-07-07	2019-02-20		2019-02-25	Hospital Universitario Virgen Del Rocío, Sevilla, Andalucia, Spain|Hospital General de Guadalajara, Guadalajara, Castilla-La Mancha, Spain|ICO Badalona Hospital Universitari Germans Trias I Pujol, Badalona, Cataluña, Spain|Hospital Universitari Clinic I Provincial, Barcelona, Cataluña, Spain|Hospital Santa Creu I Sant Pau, Barcelona, Cataluña, Spain|Hospital Mutua de Terrassa, Barcelona, Cataluña…		https://ClinicalTrials.gov/show/NCT03847220
166	NCT01930812	18F-NaF PET Imaging for Bone Scintigraphy		Completed	No Results Available	Bone Metastases From Breast or Prostate Cancer	Procedure: NaF PET/CT Imaging|Procedure: 99mTc-medronate whole body bone scan with SPECT|Drug: 18F-Sodium Fluoride (NaF)	Accuracy, sensitivity, and specificity of 18F-Sodium Fluoride (18F-NaF) Positron Emission Tomography compared to 99mTc-Methylene Diphosphonate (MDP) bone SPECT imaging for detection of bone metastasis.|The secondary outcome is to monitor the short-term side-effects following 18F-NaF PET/CT to assess for adverse drug reactions	British Columbia Cancer Agency|Canadian Institutes of Health Research (CIHR)	All	18 Years and older (Adult, Older Adult)	Phase 3	286	Other	Interventional	Allocation: N/A|Intervention Model: Single Group Assignment|Masking: None (Open Label)|Primary Purpose: Diagnostic	MITNEC-A1	2023-07-14	2023-03-17	2019-03-31	2013-08-29		April 25, 2019	Edmonton Cross Cancer Institute, Edmonton, Alberta, Canada|BC Cancer Agency, Vancouver, British Columbia, Canada|QEII Health Sciences Centre, Halifax, Nova Scotia, Canada|Hamilton Health Sciences Corp., Hamilton, Ontario, Canada|St. Joseph's Healthcare Hamilton, Hamilton, Ontario, Canada|London Health Sciences Centre, London, Ontario, Canada|The Ottawa Hospital, Ottawa, Ontario, Canada|University…		https://ClinicalTrials.gov/show/NCT01930812
167	NCT00320710	Continued Efficacy and Safety of Zoledronic Acid (q 4 Wks vs. q 12 Wks) in the 2nd Year of Treatment in Patients With Bone Metastases From Breast Cancer		Completed	Has Results	Breast Cancer	Drug: Zoledronic acid|Drug: Placebo	Proportion of Patients Who Experienced at Least One Skeletal Related Event (SRE)|Time to First SRE|Time to First Individual Type of SRE|Change From Baseline in Mean Composite Brief Pain Inventory (BPI) Score|Change From Baseline in Mean Analgesic Score|Change From Baseline in Urinary N-telopeptide / Creatinine Ratio|Change From Baseline in Serum Bone Specific Alkaline Phosphatase|Skeletal Morbidi…	Novartis Pharmaceuticals|Novartis	Female	18 Years and older (Adult, Older Adult)	Phase 3	416	Industry	Interventional	Allocation: Randomized|Intervention Model: Parallel Assignment|Masking: Double (Participant, Investigator)|Primary Purpose: Treatment	CZOL446E2352	2023-02-06	2023-07-13	2023-07-13	2006-05-03	2014-08-04	2014-08-22	Providence Alaska Medical Center Cancer Research, Anchorage, Alaska, United States|Heritage Physicians Group Oncology, Hot Springs, Arkansas, United States|The Center for Chest Care, Springdale, Arkansas, United States|Pacific Cancer Medical Center, Inc., Anaheim, California, United States|South Bay Oncology Hematology Partners, Campbell, California, United States|Bay Area Cancer Research, Concor…		https://ClinicalTrials.gov/show/NCT00320710
168	NCT00237146	Study to Evaluate Zoledronic Acid on Quality of Life and Skeletal-related Events as Adjuvant Treatment in Patients With Hormone-naïve Prostate Cancer and Bone Metastasis Who Have Undergone Orchiectomy		Completed	No Results Available	Prostate Cancer	Drug: Zoledronic acid	Evaluate the effects of Zometa® (Zoledronic Acid) i.v in doses of 4mg for measure the following parameters of efficacy: Quality of Life, Incidence of Events related to the skeleton	Novartis Pharmaceuticals|Novartis	Male	18 Years and older (Adult, Older Adult)	Phase 4	38	Industry	Interventional	Allocation: N/A|Intervention Model: Single Group Assignment|Masking: None (Open Label)|Primary Purpose: Treatment	CZOL446EVE01	2023-11-03	2023-03-08	2023-03-08	2005-10-12		2017-02-23	Novartis Investigative Site, Caracas, Venezuela		https://ClinicalTrials.gov/show/NCT00237146
169	NCT00035997	Open-label Trial on the Effect of I.V. Zoledronic Acid 4 mg on Bone Density in Hormone Sensitive Prostate Cancer Patients With Bone Metastasis		Completed	No Results Available	Prostate Cancer	Drug: Zometa	Changes in bone mineral density of the lumbar spine (L2-L4) at 12 months|Changes in biochemical markers of bone turnover over 12 months|Changes in bone mineral density of the total hip at 12 months|Time to first skeletal-related event|Overall safety measured by adverse events (AEs)	Novartis Pharmaceuticals|Novartis	Male	18 Years and older (Adult, Older Adult)	Phase 4	261	Industry	Interventional	Allocation: Non-Randomized|Intervention Model: Single Group Assignment|Masking: None (Open Label)|Primary Purpose: Treatment	CZOL446EUS24|US24	April 2002	2023-01-04	2023-01-04	2002-05-08		2009-11-23	Norwood Clinic, Birmingham, Alabama, United States|Alaska Clinical Research Center, LLC, Anchorage, Alaska, United States|Advanced Urology Medical Center, Anaheim, California, United States|Urology Associates of Central CA, Fresno, California, United States|Center for Urological Research, La Mesa, California, United States|Atlantic Urological Medical Group, Long Beach, California, United States|A…		https://ClinicalTrials.gov/show/NCT00035997
170	NCT01179464	Effect of Aminobiphosphonates and Statins on Circulating Vgamma9Vdelta2-T Cells		Completed	No Results Available	Bone Metastases of a Malignant Tumor	Drug: Aminobiphosphonate|Drug: Simvastatin	Phenotypic (APC markers: CD1d, CD40, CD80, CD83, CD86, HLA-DR; activation/memory markers: CD25, CD27, CD45RA, CD45RO, CCR7)changes in the circulating pool of Vy9Vd2-T cells.|Occurrence of a febrile response|Functional (IFN-?, TNF-a, granzyme B) changes in the circulating pool of Vy9Vd2-T cells.	Amsterdam UMC, location VUmc	All	Child, Adult, Older Adult	Not Applicable	19	Other	Interventional	Allocation: Randomized|Intervention Model: Parallel Assignment|Masking: None (Open Label)|Primary Purpose: Treatment	2010/70	2023-08-10	2023-05-13	2023-05-13	2010-08-11		2013-06-14	VU University Medical Center, Amsterdam, Netherlands		https://ClinicalTrials.gov/show/NCT01179464
171	NCT01461265	Safety and Efficacy of Cryoablation for the Palliation of Painful Bone Metastases		Completed	No Results Available	Pain|Neoplasm Metastasis	Procedure: Cryoablation	Difference in worst pain scores|Cryoablation retreatments|Additional surgical treatments other than cryoablation|Reduced analgesic usage|Time to maximal palliation of pain after cryoablation|Subject satisfaction with the amount palliation of pain obtained from cryoablation|Number of adverse events|Difference in average pain scores|Time to recurrence of worst pain	Boston Scientific Corporation	All	18 Years and older (Adult, Older Adult)	Phase 1	29	Industry	Interventional	Allocation: N/A|Intervention Model: Single Group Assignment|Masking: None (Open Label)|Primary Purpose: Supportive Care	CUC10-BNE11	2023-11-11	April 2015	April 2015	2011-10-28		2021-07-16	Karmanos Cancer Institute, Detroit, Michigan, United States|University of Texas M.D. Anderson Cancer Center, Houston, Texas, United States|University of British Columbia, Vancouver, British Columbia, Canada|University Hospital of Strasbourg, Strasbourg, France		https://ClinicalTrials.gov/show/NCT01461265
172	NCT02011880	Standardization Research of TCM Syndrome Differentiation and Treatment on Advanced Breast Cancer		Temporarily not available	No Results Available	Breast Cancer|Bone Metastasis	Dietary Supplement: Chinese Herbs		Shanghai University of Traditional Chinese Medicine	Female	20 Years to 70 Years (Adult, Older Adult)			Other	Expanded Access		ZYSNXD-CC-ZDYJ043				2013-12-13		2013-12-13			https://ClinicalTrials.gov/show/NCT02011880
173	NCT00286091	Study on Prolonging Bone Metastasis-Free Survival in Men With Hormone Refractory Prostate Cancer		Completed	Has Results	Hormone Refractory Prostate Cancer	Biological: Denosumab|Biological: Placebo	Bone Metastasis-free Survival|Time to First Bone Metastasis|Overall Survival	Amgen	Male	18 Years and older (Adult, Older Adult)	Phase 3	1435	Industry	Interventional	Allocation: Randomized|Intervention Model: Parallel Assignment|Masking: Quadruple (Participant, Care Provider, Investigator, Outcomes Assessor)|Primary Purpose: Prevention	20050147	2006-01-24	2010-07-30	April 9, 2014	2006-02-03	April 6, 2015	2018-10-17			https://ClinicalTrials.gov/show/NCT00286091
174	NCT00375427	Safety and Efficacy of Zoledronic Acid in Patients With Breast Cancer With Metastatic Bone Lesions		Completed	Has Results	Breast Cancer With Bone Metastasis	Drug: Zoledronic acid	Annual Overall Skeletal Morbidity Rate (SMR)|Percentage of Participants Experiencing Skeletal Related Event(s) (SREs)|Annual Incidence of Any Skeletal Related Events (SREs)|Median Time to First Skeletal Related Event(s) (SRE)|Percentage of Participants Skeletal Related Event (SRE) Free|Composite Bone Pain Score According to the Brief Pain Inventory (BPI) Questionnaire|Evaluation of Pain According…	Novartis Pharmaceuticals|Novartis	Female	18 Years and older (Adult, Older Adult)	Phase 3	430	Industry	Interventional	Allocation: Randomized|Intervention Model: Parallel Assignment|Masking: None (Open Label)|Primary Purpose: Treatment	CZOL446EIT14	2023-02-06	2023-02-10		2006-09-13	2011-08-04	April 11, 2012	Novartis Investigative Site, Forlì, Italy		https://ClinicalTrials.gov/show/NCT00375427
175	NCT02398526	Pain Evaluation in Radium-223 Treated Castration Resistant Prostate Cancer Patients With Bone Metastases	PARABO	Completed	No Results Available	Castration-Resistant Prostatic Cancer	Drug: Radium-223 dichloride, (Xofigo, BAY88-8223)	Pain response|Change of pain over time|Change in bone pain related quality of life|Pain control rate|Pain progression rate|Time to first pain progression|Time to first opioid use|Summary description of covariates on pain response|Relation between bone uptake in known lesions and pain palliation|Dosage of Radium-223|Number of injections of Radium-223|Course of blood count presented as percentage o…	Bayer	Male	18 Years and older (Adult, Older Adult)		363	Industry	Observational	Observational Model: Cohort|Time Perspective: Prospective	17550|XF1412DE	2015-03-19	2020-05-20	2020-07-15	2015-03-25		2021-11-02	Multiple Locations, Germany		https://ClinicalTrials.gov/show/NCT02398526
176	NCT01461252	Safety and Efficacy of Cryoablation Combined With Radiation Therapy for the Palliation of Painful Bone Metastases		Withdrawn	No Results Available	Pain|Neoplasm Metastasis	Procedure: Cryoablation|Procedure: Radiation	Difference in worst pain scores|Cryoablation retreatments|Additional surgical treatments other than cryoablation|Reduced analgesic usage|Time to maximal palliation of pain after cryoablation|Number of adverse events|Difference in average pain scores|Time to recurrence of worst pain|Subject satisfaction with the amount of palliation of pain obtained from cryoablation combined with radiation	Boston Scientific Corporation	All	18 Years and older (Adult, Older Adult)	Phase 1	0	Industry	Interventional	Allocation: N/A|Intervention Model: Single Group Assignment|Masking: None (Open Label)|Primary Purpose: Supportive Care	CUC10-BNE01	April 2013	2023-03-14	2023-03-14	2011-10-28		2021-07-16			https://ClinicalTrials.gov/show/NCT01461252
177	NCT02283749	BrUOG L301 With Non-Small Cell Lung Cancer and Bone Metastases		Completed	Has Results	Non Small Cell Lung Cancer With Bone Metastatses	Biological: Xofigo	Number of Symptomatic Skeletal Events (SSE) in Patients Receiving Xofigo With NSCLC and Bone Metastases|Progression-free Survival of Patients With NSCLC and Bone Metastases and Stable or Responding Disease After Front-line Chemotherapy Treated With Xofigo|Overall Survival of Patients With NSCLC and Bone Metastases and Stable or Responding Disease After Front-line Chemotherapy Treated With Xofigo	Angela Taber MD|Rhode Island Hospital|The Miriam Hospital|Bayer|Brown University	All	18 Years and older (Adult, Older Adult)	Phase 2	5	Other|Industry	Interventional	Allocation: N/A|Intervention Model: Single Group Assignment|Masking: None (Open Label)|Primary Purpose: Treatment	BrUOG 301	2023-09-15	2018-07-05	2018-11-13	2014-11-05	2018-06-08	2021-02-02	Rhode Island Hospital and The Miriam Hospital, Providence, Rhode Island, United States	"Study Protocol", https://ClinicalTrials.gov/ProvidedDocs/49/NCT02283749/Prot_000.pdf|"Statistical Analysis Plan", https://ClinicalTrials.gov/ProvidedDocs/49/NCT02283749/SAP_001.pdf	https://ClinicalTrials.gov/show/NCT02283749
178	NCT00699751	A Phase III Study of Radium-223 Dichloride in Patients With Symptomatic Hormone Refractory Prostate Cancer With Skeletal Metastases	ALSYMPCA	Completed	Has Results	Hormone Refractory Prostate Cancer|Bone Metastases	Drug: Radium-223 dichloride (Xofigo, BAY88-8223)|Drug: Placebo|Drug: Best standard of care (BSoC)	Overall Survival|Time to Total Alkaline Phosphatase (ALP) Progression|Percentage of Participants With Total ALP Response at Week 12|Percentage of Participants With Total ALP Response at End of Treatment (EOT; Week 24 or at the Time the Patient Dies or Discontinues Treatment Phase)|Percentage of Participants With Total ALP Normalization at Week 12|Percentage Change From Baseline in Total ALP at We…	Bayer	Male	18 Years and older (Adult, Older Adult)	Phase 3	921	Industry	Interventional	Allocation: Randomized|Intervention Model: Parallel Assignment|Masking: Quadruple (Participant, Care Provider, Investigator, Outcomes Assessor)|Primary Purpose: Treatment	15245|BC1-06|2007-006195-11	2023-06-08	2023-07-11	2023-02-14	2008-06-18	2014-05-07	2016-05-27	Los Angeles, California, United States|Roseville, California, United States|Tampa, Florida, United States|New Orleans, Louisiana, United States|St. Louis, Missouri, United States|Las Vegas, Nevada, United States|Philadelphia, Pennsylvania, United States|Liverpool, New South Wales, Australia|Randwick, New South Wales, Australia|St Leonards, New South Wales, Australia|Sydney, New South Wales, Austr…		https://ClinicalTrials.gov/show/NCT00699751
179	NCT00080678	Docetaxel With or Without Imatinib Mesylate in Treating Patients With Androgen-Independent Prostate Cancer and Bone Metastases		Completed	No Results Available	Metastatic Cancer|Prostate Cancer	Drug: Docetaxel|Drug: Imatinib Mesylate	Time to progression|Response rate|Toxic effects	M.D. Anderson Cancer Center|National Cancer Institute (NCI)	Male	Child, Adult, Older Adult	Phase 2	116	Other|NIH	Interventional	Allocation: Randomized|Intervention Model: Parallel Assignment|Masking: Triple (Participant, Care Provider, Investigator)|Primary Purpose: Treatment	CDR0000354505|MDA-ID-030008|NOVARTIS-MDA-ID-030008|MSKCC-03132|DFCI-03187	2023-05-03	2023-08-05	2023-03-08	April 8, 2004		2012-10-12	Dana-Farber/Harvard Cancer Center at Dana Farber Cancer Institute, Boston, Massachusetts, United States|Memorial Sloan-Kettering Cancer Center, New York, New York, United States|M.D. Anderson Cancer Center at University of Texas, Houston, Texas, United States		https://ClinicalTrials.gov/show/NCT00080678
180	NCT03157310	Bone Metastasis on the Survival of Gefitinib Effective Patients		Completed	No Results Available	Overal Survival, Non-small Cell Lung Cancer	Drug: Gefitinib	Overal survival of patients|Survival of patients with both bone metastasis and brain metastasis	Qilu Hospital of Shandong University	All	18 Years to 85 Years (Adult, Older Adult)	Not Applicable	265	Other	Interventional	Allocation: N/A|Intervention Model: Single Group Assignment|Masking: None (Open Label)|Primary Purpose: Treatment	2017-QLH-11	2009-05-01	2013-05-01	2015-07-12	2017-05-17		2017-05-17			https://ClinicalTrials.gov/show/NCT03157310
181	NCT03336983	Luteinizing Hormone-releasing Hormone Analogue and Enzalutamide Zoledronic Acid in Prostate Cancer Patients	BonEnza	Recruiting	No Results Available	Prostate Cancer|Bone Metastases	Drug: Zoledronic Acid|Drug: Enzalutamide	Evaluation of change in bone response after 6 and 12 months of treatment compared to baseline|Evaluation of bone repair|Changes in bone mineral density after 18 months of treatment compared to baseline|Functional Assessment of Cancer Therapy-Prostate|Brief Pain Inventory-Short Form Questionnaire|Weight evaluation|C-terminal telopeptide analysis|Bone alkaline phosphatase analysis	Azienda Socio Sanitaria Territoriale degli Spedali Civili di Brescia	Male	18 Years and older (Adult, Older Adult)	Phase 2	120	Other	Interventional	Allocation: Randomized|Intervention Model: Parallel Assignment|Masking: None (Open Label)|Primary Purpose: Treatment	ASCB-ONCO-2336-2017|2017-000305-21	2017-12-01	2023-12-01	2023-12-01	2017-11-08		2022-03-07	Azienda Ospedaliera Spedali Civili di Brescia, Brescia, Italy		https://ClinicalTrials.gov/show/NCT03336983
182	NCT00540969	Cryoablation or External-Beam Radiation Therapy in Treating Patients With Painful Bone Metastases		Terminated	Has Results	Kidney Cancer|Melanoma (Skin)|Metastatic Cancer|Pain|Unspecified Adult Solid Tumor, Protocol Specific	Procedure: cryosurgery|Radiation: radiation therapy	Comparison of Pre- and Post-treatment Worst Pain in 24 Hours at Week 6 as Measured on the Numeric 0 to 10 Brief Pain Inventory (BPI) Scale|Average Difference in Pre- and Post-treatment Average Pain, Pain Relief, and Pain Interference Scores at Week 6 as Measured With the BPI|Average Difference in Pre- and Post-treatment Physical (PCS-8) and Mental (MCS-8) Quality of Life at Week 6 as Measured by …	Alliance for Clinical Trials in Oncology|National Cancer Institute (NCI)	All	18 Years and older (Adult, Older Adult)	Phase 3	3	Other|NIH	Interventional	Allocation: Randomized|Intervention Model: Parallel Assignment|Masking: None (Open Label)|Primary Purpose: Treatment	NCCTG-N06C6|NCI-2009-00690|CDR0000570788	2023-02-08	2023-01-10	2023-01-10	2007-10-08	2017-02-01	2018-11-21	UAB Comprehensive Cancer Center, Birmingham, Alabama, United States|Mayo Clinic Scottsdale, Scottsdale, Arizona, United States|Mayo Clinic - Jacksonville, Jacksonville, Florida, United States|Barbara Ann Karmanos Cancer Institute, Detroit, Michigan, United States|Mayo Clinic Cancer Center, Rochester, Minnesota, United States|Vince Lombardi Cancer Clinic at Aurora St. Luke's Medical Center, Milwau…		https://ClinicalTrials.gov/show/NCT00540969
183	NCT00084825	Docetaxel and Imatinib Mesylate in Treating Patients With Androgen-Independent Prostate Cancer and Bone Metastases That Progressed on the Docetaxel and Placebo Group of MDA-ID-030008		Completed	No Results Available	Metastatic Cancer|Prostate Cancer	Drug: Docetaxel|Drug: Imatinib mesylate	Treatment efficacy|Time to progression|Response rate	M.D. Anderson Cancer Center|National Cancer Institute (NCI)	Male	Child, Adult, Older Adult	Phase 2	23	Other|NIH	Interventional	Allocation: N/A|Intervention Model: Single Group Assignment|Masking: None (Open Label)|Primary Purpose: Treatment	CDR0000365625|MDA-ID-030222|MSKCC-03149|ID03-0222	2023-05-03	2023-07-06	2023-06-08	2004-06-11		2012-10-26	Dana-Farber/Harvard Cancer Center at Dana Farber Cancer Institute, Boston, Massachusetts, United States|Memorial Sloan-Kettering Cancer Center, New York, New York, United States|M.D. Anderson Cancer Center at University of Texas, Houston, Texas, United States		https://ClinicalTrials.gov/show/NCT00084825
184	NCT02637479	Treatment of Opioid-refractory Pain (WHO Level III) by Pituitary Radiosurgery	Hyporadoul	Unknown status	No Results Available	Any Cancer With Multiple Bone Metastases	Device: GammaKnife®|Device: 18F-2-fluoro-2-deoxy-D-glucose - positron emission tomography (FDG-PET)|Device: MRI	The pain assessment|assessment of the visual fields|assessment of the visual acuity|endocrine balance|Pituitary morphology|evaluate metabolic consumption of glucose|evaluate metabolic connectivity at resting-state	Assistance Publique Hopitaux De Marseille	All	18 Years and older (Adult, Older Adult)	Not Applicable	40	Other	Interventional	Allocation: Randomized|Intervention Model: Parallel Assignment|Masking: None (Open Label)|Primary Purpose: Treatment	2014-51|2015-A00616-43|RCAPHM15_0022	2023-12-15	2023-12-18	2023-12-18	2015-12-22		2015-12-22	Assistance Publique Hôpitaux de Marseille, Marseille, France		https://ClinicalTrials.gov/show/NCT02637479
185	NCT00090363	ZD4054 (Zibotentan) in Pain-free or Mildly Symptomatic Patients With Prostate Cancer and Bone Metastases Who Have Rising Serum Prostate Specific Antigen (PSA)		Completed	Has Results	Prostate Cancer	Drug: ZD4054 15 mg|Drug: Placebo|Drug: ZD4054 10 mg	Time to Progression (TTP)|Time to Death|Change in Total Prostate Specific Antigen (PSA) Over Time|Objective Response Rate (ORR)|Change in Number of Bone Metastases Over Time	AstraZeneca	Male	18 Years and older (Adult, Older Adult)	Phase 2	447	Industry	Interventional	Allocation: Randomized|Intervention Model: Parallel Assignment|Masking: Quadruple (Participant, Care Provider, Investigator, Outcomes Assessor)|Primary Purpose: Treatment	D4320C00006|Trial 6|ZD4054	2023-07-04	2023-12-08	2023-08-11	2004-08-30	2012-09-03	2013-01-08	Research Site, Tucson, Arizona, United States|Research Site, Los Angeles, California, United States|Research Site, Gainsville, Florida, United States|Research Site, Chicago, Illinois, United States|Research Site, Baltimore, Maryland, United States|Research Site, Cleveland, Ohio, United States|Research Site, Simpsonville, South Carolina, United States|Research Site, Wolloongabba, Queensland, Austr…		https://ClinicalTrials.gov/show/NCT00090363
186	NCT02443103	Study Evaluating the Biologic Activity of Guanabenz in Bone Metastasis		Terminated	Has Results	Bone Cancer|Metastasis	Drug: Guanabenz acetate	Bone Turnover Markers-bone Formation and Bone Resorption|Treatment Related Adverse Events	Kathy Miller|Indiana University	All	18 Years and older (Adult, Older Adult)	Not Applicable	4	Other	Interventional	Allocation: N/A|Intervention Model: Single Group Assignment|Masking: None (Open Label)|Primary Purpose: Treatment	IUCRO-0506	2015-05-07	2016-06-08	2016-06-08	2015-05-13	2018-02-13	2018-02-13	Indiana University Health Hospital, Indianapolis, Indiana, United States|Indiana University Melvin and Bren Simon Cancer Center, Indianapolis, Indiana, United States|Sidney & Lois Eskenazi Hospital, Indianapolis, Indiana, United States|Spring Mill Medical Center, Indianapolis, Indiana, United States		https://ClinicalTrials.gov/show/NCT02443103
187	NCT00172042	A Study to Evaluate the Safety and Efficacy of Zoledronic Acid in the Prevention or Delaying of Bone Metastasis in Patients With Stage IIIA and IIIB Non-small Cell Lung Cancer (NSCLC)		Completed	Has Results	Non-Small-Cell Lung Cancer	Drug: Zoledronic acid 4 mg	Progression-Free Survival|Kaplan-Meier Estimates for Progression-free Survival|Percentage of Participants With Progression-Free Survival Events|Percentage of Participants With Bone Metastases at 6, 12, 18, and 24 Months|Kaplan-Meier Estimate of the Time to Occurrence of Bone Metastases|Percentage of Participants With Skeletal Related Events (SREs) at 12 and 24 Months From Study Entry|Kaplan-Meier…	Novartis Pharmaceuticals|Novartis	All	18 Years and older (Adult, Older Adult)	Phase 3	437	Industry	Interventional	Allocation: Randomized|Intervention Model: Parallel Assignment|Masking: None (Open Label)|Primary Purpose: Prevention	CZOL446G2419	2023-03-05	2023-05-10	2023-06-10	2005-09-15	2011-07-19	2015-05-04	Novartis Investigative Site, Jette, Belgium|Novartis Investigative Site, Leuven, Belgium|Novartis Investigative Site, Liege, Belgium|Novartis Investigative Site, Beijing, China|Novartis Investigative Site, Guangzhou, China|Novartis Investigative Site, Shanghai, China|Novartis Investigative Site, Clamart, France|Novartis Investigative Site, Clemont, France|Novartis Investigative Site, Berlin, Germ…		https://ClinicalTrials.gov/show/NCT00172042
188	NCT04017728	Percutaneous Vertebroplasty Using Rotary Cutter for Bone Metastases		Recruiting	No Results Available	Metastasis	Device: Conventional Percutaneous Vertebroplasty|Device: Percutaneous Vertebroplasty with Rotary Cutter	Back pain: Visual analogue scales system|The patterns of cement opacification|Cement leakage|Cement volume	Li Min|Jinan Military General Hospital	All	Child, Adult, Older Adult	Not Applicable	70	Other	Interventional	Allocation: Randomized|Intervention Model: Parallel Assignment|Masking: Triple (Participant, Care Provider, Investigator)|Primary Purpose: Treatment	960HP20190051	2019-07-30	April 2024	2023-12-25	2019-07-12		2019-07-16	960 Hospital of PLA, Jinan, Shandong, China		https://ClinicalTrials.gov/show/NCT04017728
189	NCT01618370	Radium(223) Dichloride (Alpharadin) in Castration-Resistant (Hormone-Refractory) Prostate Cancer Patients With Bone Metastases		Completed	No Results Available	Prostatic Neoplasms	Drug: Radium-223 dichloride (BAY88-8223)	Acute safety, variables will be summarized using descriptive statistics based on adverse events collection|Long-term safety, variables will be summarized using descriptive statistics based on adverse events collection|Brief Pain Inventory, as assessed by BPI-SF questionnaire (Brief Pain Inventory-Short Form)	Bayer	Male	18 Years and older (Adult, Older Adult)	Phase 3	705	Industry	Interventional	Allocation: N/A|Intervention Model: Single Group Assignment|Masking: None (Open Label)|Primary Purpose: Treatment	16216|2012-000075-16	2012-07-22	2014-08-13	2016-02-28	2012-06-13		2017-03-31	Brugge, Belgium|Bruxelles - Brussel, Belgium|Bruxelles - Brussel, Belgium|Bruxelles - Brussel, Belgium|Edegem, Belgium|Gent, Belgium|Kortrijk, Belgium|Leuven, Belgium|Ottignies, Belgium|Edmonton, Alberta, Canada|Vancouver, British Columbia, Canada|Ottawa, Ontario, Canada|Toronto, Ontario, Canada|Toronto, Ontario, Canada|Montreal, Quebec, Canada|Brno, Czech Republic|Ostrava, Czech Republic|Plzen -…		https://ClinicalTrials.gov/show/NCT01618370
190	NCT00375648	Efficacy and Safety of Zoledronic Acid in the Treatment of Bone Metastases-related Pain in Patients With Prostate Cancer	TRAPEZE	Completed	No Results Available	Pain	Drug: Zoledronic acid	to measure the intensity of the pain relief of the patients at the end of treatment with a five classes score (TOTPAR = TOTal PAin Relief)|To measure the intensity of the pain relief of the patients with the PAR at each visit|To evaluate the pain variation with VAS between V1 and V2, V3, V4, V5.|To evaluate the pain variation with BPI (=Brief Pain Inventory) and correlate with VAS (=Visual Analog…	Novartis Pharmaceuticals|Novartis	Male	18 Years and older (Adult, Older Adult)	Phase 3	61	Industry	Interventional	Allocation: Non-Randomized|Intervention Model: Single Group Assignment|Masking: None (Open Label)|Primary Purpose: Treatment	CZOL446EFR08	2023-06-05	2023-07-07		2006-09-13		2017-06-02	Novartis Investigative Site, Monpellier, France		https://ClinicalTrials.gov/show/NCT00375648
191	NCT01516762	Radium-223 Dichloride (BAY88-8223) in Castration-Resistant (Hormone-Refractory) Prostate Cancer Patients With Bone Metastases		No longer available	No Results Available	Prostatic Neoplasms	Drug: Radium-223 dichloride (BAY88-8223)		Bayer	Male	18 Years and older (Adult, Older Adult)			Industry	Expanded Access		15995|2011-004469-33				2012-01-25		2014-07-14	Birmingham, Alabama, United States|Phoenix, Arizona, United States|Scottsdale, Arizona, United States|Greenbrae, California, United States|La Jolla, California, United States|San Francisco, California, United States|Stanford, California, United States|Aurora, Colorado, United States|Newark, Delaware, United States|Washington, District of Columbia, United States|Washington, District of Columbia, U…		https://ClinicalTrials.gov/show/NCT01516762
192	NCT05419518	Palliative Dose Escalated Radiation for Painful Non-Spine Bone Metastases and Painful Non-Bone Metas		Not yet recruiting	No Results Available	Neoplasm Metastases|Metastases, Neoplasm	Biological: EXTERNAL BEAM RADIATION	Safety as assessed by number of participants experiencing adverse events|Severity as assessed by number of participants experiencing toxicity and adverse events	Rutgers, The State University of New Jersey	All	18 Years and older (Adult, Older Adult)	Phase 2	124	Other	Interventional	Allocation: Non-Randomized|Intervention Model: Single Group Assignment|Masking: None (Open Label)|Primary Purpose: Treatment	152201	2022-07-30	April 1, 2024	April 1, 2024	2022-06-15		2022-06-15	RWJBarnabas Health - Robert Wood Johnson University Hospital, Hamilton, New Jersey, United States|RWJBarnabas Health - Saint Barnabas Medical Center, Livingston, New Jersey, United States|Robert Wood Johnson University Hospital, New Brunswick, New Jersey, United States|Cancer Institute of New Jersey, New Brunswick, New Jersey, United States|RWJBarnabas Health - Robert Wood Johnson University Hosp…		https://ClinicalTrials.gov/show/NCT05419518
193	NCT02354326	Dual Energy Computed Tomography (CT) in Finding Bone Metastases in Patients With Cancer		Terminated	No Results Available	Malignant Neoplasm|Metastatic Malignant Neoplasm to the Bone	Radiation: virtual non-calcium dual-energy computed tomography|Radiation: computed tomography	Number of Lesions Present|Number of lesions absent|Confidence in the presence of one or more lesions in that particular anatomic location using a 0-100 point confidence scale|Accuracy of VNC DECT	Case Comprehensive Cancer Center|National Cancer Institute (NCI)	All	18 Years and older (Adult, Older Adult)		16	Other|NIH	Observational	Observational Model: Cohort|Time Perspective: Prospective	CASE5Y14|NCI-2014-02497|P30CA043703	2014-11-07	2017-09-27	2017-09-27	2015-02-03		2019-02-05	Cleveland Clinic Taussig Cancer Institute, Case Comprehensive Cancer Center, Cleveland, Ohio, United States	"Study Protocol and Statistical Analysis Plan", https://ClinicalTrials.gov/ProvidedDocs/26/NCT02354326/Prot_SAP_000.pdf	https://ClinicalTrials.gov/show/NCT02354326
194	NCT02517918	Metronomic Chemotherapy in Patients With Advanced Solid Tumor With Bone Metastasis and Advanced Pretreated Osteosarcoma	METZOLIMOS	Recruiting	No Results Available	Solid Tumor|Osteosarcoma	Drug: Sirolimus combined with CP, MT and ZA	Maximum tolerated dose (MTD) evaluated on the first cycle (D1 to D28) of sirolimus when administered in association with CP, MT and ZA|Recommended phase II dose (RP2D) of sirolimus when administered in association with CP, MT and ZA|Documentation of any observed antitumor activity|PK measurements expressed as Area Under Curve for CP|PK measurements expressed as Area Under Curve for MT|PK measurem…	Institut Bergonié|Reliable Cancer Therapies|Pfizer	All	13 Years and older (Child, Adult, Older Adult)	Phase 1	26	Other|Industry	Interventional	Allocation: N/A|Intervention Model: Single Group Assignment|Masking: None (Open Label)|Primary Purpose: Treatment	IB 2014-01	2023-02-15	2023-09-21	2023-03-22	2015-08-07		2021-05-05	Institut Bergonié, Bordeaux, France|Centre Oscar Lambret, Lille, France|Centre Léon Bérard, Lyon, France		https://ClinicalTrials.gov/show/NCT02517918
195	NCT00265200	Using TRAP to Evaluate the Effect of Zometa on Bone Metastasis Due to Lung Cancer		Terminated	Has Results	Carcinoma, Non-Small Cell Lung|Carcinoma, Small Cell Lung|Metastases	Drug: zoledronic acid	Average Percent Change From Baseline in TRAP Levels at 2 Weeks	University of Louisville|James Graham Brown Cancer Center|Novartis Pharmaceuticals	All	18 Years and older (Adult, Older Adult)	Phase 2	28	Other|Industry	Interventional	Allocation: N/A|Intervention Model: Single Group Assignment|Masking: None (Open Label)|Primary Purpose: Diagnostic	565.04|BCC-LUN-04-002	2023-02-05	2023-08-09	2023-12-10	2005-12-14	April 6, 2017	2018-03-05	James Graham Brown Cancer Center, Louisville, Kentucky, United States		https://ClinicalTrials.gov/show/NCT00265200
196	NCT00390468	Tandutinib in Treating Patients With Progressive Prostate Cancer and Bone Metastases		Completed	Has Results	Metastatic Cancer|Pain|Prostate Cancer	Drug: Tandutinib	8-week Freedom-From-Progression (FFP)	National Cancer Institute (NCI)	Male	18 Years and older (Adult, Older Adult)	Phase 2	18	NIH	Interventional	Allocation: N/A|Intervention Model: Single Group Assignment|Masking: None (Open Label)|Primary Purpose: Treatment	NCI-2012-02865|P30CA016672|MDA-2005-0717|NCI-7409|CDR0000504104	2023-10-06	2023-11-09	2023-11-09	2006-10-19	2011-06-07	2014-05-28	M. D. Anderson Cancer Center at University of Texas, Houston, Texas, United States		https://ClinicalTrials.gov/show/NCT00390468
197	NCT01920568	A Study to Compare Denosumab With Zoledronic Acid in Subjects With Bone Metastases From Solid Tumors		Completed	Has Results	Fractures, Bone	Biological: Denosumab 70 mg/mL|Drug: Zoledronic acid 4 mg|Drug: Placebo IV|Drug: Placebo SC|Dietary Supplement: Calcium supplement|Dietary Supplement: Vitamin D supplement	Percent Change (Chg) From Baseline (BL) to Week (Wk)13 in Urinary Amino-terminal Cross-linking Telopeptide of Type I Collagen Corrected for Urine Creatinine (uNTx/uCr)|Percentage Change From Baseline to Week 13 in Urinary Amino-terminal Cross-linking Telopeptide of Type I Collagen of Type I Collagen Corrected for Urine Creatinine (uNTx/uCr) in Chinese Participants.|Percentage Change From Baseline…	GlaxoSmithKline|Amgen	All	18 Years and older (Adult, Older Adult)	Phase 3	487	Industry	Interventional	Allocation: Randomized|Intervention Model: Parallel Assignment|Masking: Double (Participant, Investigator)|Primary Purpose: Treatment	114273	2023-08-13	2023-02-15	April 2016	2013-08-12	2016-08-25	2017-01-16	GSK Investigational Site, Guangzhou, Guangdong, China|GSK Investigational Site, Guangzhou, Guangdong, China|GSK Investigational Site, Guangzhou, Guangdong, China|GSK Investigational Site, Wuhan, Hubei, China|GSK Investigational Site, Nanjing, Jiangsu, China|GSK Investigational Site, Nanjing, Jiangsu, China|GSK Investigational Site, Changchun, Jilin, China|GSK Investigational Site, Chengdu, Sichua…		https://ClinicalTrials.gov/show/NCT01920568
198	NCT00326820	Ibandronate or Zoledronate in Treating Patients With Newly Diagnosed Bone Metastases From Breast Cancer		Unknown status	No Results Available	Breast Cancer|Hypercalcemia of Malignancy|Metastatic Cancer	Drug: ibandronate sodium|Drug: zoledronic acid|Drug: Zolendronic Acid	Frequency and timing of skeletal-related events (SREs)|Time to first SREs|Proportion of patients with SREs|Pain and analgesic score|Quality of life|Toxicity|Survival|Health resource usage and serum bone marker levels	Wales Cancer Trials Unit|Velindre NHS Trust	All	18 Years and older (Adult, Older Adult)	Phase 3	1404	Other	Interventional	Allocation: Randomized|Intervention Model: Parallel Assignment|Masking: None (Open Label)|Primary Purpose: Treatment	CDR0000478864|WCTU-ZICE|NCRI-ZICE|ROCHE-ZICE|ISRCTN13914201|EU-20613|EUDRACT-2005-001710-40	2023-01-06	2023-12-12	2023-10-15	2006-05-17		2013-03-13	William Harvey Hospital, Ashford, England, United Kingdom|North Devon District Hospital, Barnstaple, England, United Kingdom|Royal Bournemouth Hospital, Bournemouth, England, United Kingdom|Burnley General Hospital, Burnley, England, United Kingdom|Queen's Hospital, Burton-upon-Trent, England, United Kingdom|Kent and Canterbury Hospital, Canterbury, England, United Kingdom|Broomfield Hospital, Ch…		https://ClinicalTrials.gov/show/NCT00326820
199	NCT00434447	Long Term Efficacy and Safety of Zoledronic Acid Treatment in Patients With Bone Metastases		Completed	No Results Available	Bone Neoplasms	Drug: Zoledronic acid	Safety assessed by incidence of renal impairment, osteonecrosis of the Jaw (ONJ), adverse events and serious adverse events. Efficacy assessed by incidence of skeletal related events (SREs).	Novartis Pharmaceuticals|Novartis	All	18 Years and older (Adult, Older Adult)	Phase 4	73	Industry	Interventional	Allocation: Non-Randomized|Intervention Model: Single Group Assignment|Masking: None (Open Label)|Primary Purpose: Prevention	CZOL446EAU22	2023-12-06	2023-09-09		2007-02-13		2017-02-27	Novartis Investigative Site, Canberra, Australian Capital Territory, Australia|Novartis Investigative Site, Concord, New South Wales, Australia|Novartis Investigative Site, Liverpool, New South Wales, Australia|Novartis Investigative Site, Wagga Wagga, New South Wales, Australia|Novartis Investigative Site, Redcliffe, Queensland, Australia|Novartis Investigative Site, Townsville, Queensland, Aust…		https://ClinicalTrials.gov/show/NCT00434447
200	NCT03858205	Low-Dose Radiotherapy in Treating Painful Bone Metastases in Patients With Multiple Myeloma		Recruiting	No Results Available	Bone Pain|Metastatic Malignant Neoplasm in the Bone|Plasma Cell Myeloma	Other: Quality-of-Life Assessment|Other: Questionnaire Administration|Radiation: Radiation Therapy	Pain response|Quality of life (QOL) as measured by European Organization for Research and Treatment of Cancer Metastases Module (EORTC QLQ-BM22)|Quality of life (QOL) as measured by European Organization for Research and Treatment of Cancer Quality of life Questionnaire Core 30 (EORTC QLQ-C30)	University of Southern California|National Cancer Institute (NCI)	All	18 Years and older (Adult, Older Adult)	Not Applicable	100	Other|NIH	Interventional	Allocation: N/A|Intervention Model: Single Group Assignment|Masking: None (Open Label)|Primary Purpose: Treatment	16M-18-2|NCI-2018-03600|P30CA014089	2019-03-11	2023-03-11	2024-03-11	2019-02-28		2022-03-02	City of Hope, Duarte, California, United States|Los Angeles County-USC Medical Center, Los Angeles, California, United States|USC / Norris Comprehensive Cancer Center, Los Angeles, California, United States|Emory University Hospital/Winship Cancer Institute, Atlanta, Georgia, United States|Dana-Farber Cancer Institute, Boston, Massachusetts, United States|University of Minnesota - Masonic Cancer …		https://ClinicalTrials.gov/show/NCT03858205
201	NCT04325776	A Study of AL2846 Versus Zoledronic Acid in Subjects With Advanced Non-Small Cell Lung Cancer With Bone Metastasis		Unknown status	No Results Available	Bone Metastatic Non-small Cell Lung Cancer	Drug: AL2846|Drug: Zoledronic Acid Injection	The time when the first bone-related event (SRE) occurred|Overall survival (OS)|Progression-free survival (PFS)|Overall response rate (ORR)|Duration of Response (DOR)|Disease control rate(DCR)|Effectiveness of improving average daily pain intensity on week 8 and 16 (Refer to Brief pain inventory (BPI) and the Verbal rating scale (VRS)|Biomarkers	Chia Tai Tianqing Pharmaceutical Group Co., Ltd.	All	18 Years and older (Adult, Older Adult)	Phase 2	60	Industry	Interventional	Allocation: Randomized|Intervention Model: Parallel Assignment|Masking: Quadruple (Participant, Care Provider, Investigator, Outcomes Assessor)|Primary Purpose: Treatment	AL2846-II-01	2020-09-24	2023-05-21	2023-11-21	2020-03-30		2020-10-12	Anhui Chest Hospital, Hefei, Anhui, China|Henan Cancer Hospital, Zhengzhou, Henan, China|China-Japan Union Hospital Of Jilin University, Changchun, Jilin, China|Jinzhou Central Hospital, Jinzhou, Liaoning, China|Shenyang Chest Hospital, Shenyang, Liaoning, China|Sir Run Run Shaw Hospital (SRRSH), Hangzhou, Zhejiang, China|The First Hospital of Jiaxing, Jiaxing, Zhejiang, China|Quzhou People's Hos…		https://ClinicalTrials.gov/show/NCT04325776
202	NCT00466102	Efficacy of RAD001 in Breast Cancer Patients With Bone Metastases	RADAR	Unknown status	No Results Available	Breast Cancer	Drug: RAD001|Drug: Placebo	To determine the time to progression (TTP) in patients with no change in bone metastases after an 8 week run in treatment with RAD001 compared to placebo|To determine the objective response rate after 8 weeks of RAD001|To determine the TTP in patients with a response after 8 weeks of RAD001|To determine the overall clinical benefit defined as CR, PR or stable disease > 24 weeks for patients conti…	German Breast Group|Novartis	Female	18 Years and older (Adult, Older Adult)	Phase 2	130	Other|Industry	Interventional	Allocation: Randomized|Intervention Model: Parallel Assignment|Masking: Triple (Participant, Care Provider, Investigator)|Primary Purpose: Treatment	GBG 41	2023-12-06	2023-12-10	2023-12-12	April 27, 2007		2012-08-30	Dr. med. Christoph Mundhenke, Kiel, Schleswig-Holstein, Germany		https://ClinicalTrials.gov/show/NCT00466102
203	NCT04693377	Cryoablation Combined With Stereotactic Body Radiation Therapy for the Treatment of Painful Bone Metastases, the CROME Trial		Recruiting	No Results Available	Castration-Resistant Prostate Carcinoma|Metastatic Colorectal Carcinoma|Metastatic Malignant Neoplasm in the Bone|Metastatic Malignant Solid Neoplasm|Metastatic Melanoma|Metastatic Prostate Carcinoma|Metastatic Renal Cell Carcinoma|Metastatic Sarcoma|Metastatic Thyroid Gland Carcinoma|Metastatic Urothelial Carcinoma|Stage IV Colorectal Cancer AJCC v8|Stage IV Prostate Cancer AJCC v8|Stage IV Rena…	Procedure: Cryosurgery|Other: Quality-of-Life Assessment|Radiation: Stereotactic Body Radiation Therapy	Pain response|Daily morphine equivalent (MEDD)|Duration of response|Local control|Rate and severity of adverse and serious related adverse events|Technical success for cryoablation	M.D. Anderson Cancer Center	All	18 Years and older (Adult, Older Adult)	Not Applicable	40	Other	Interventional	Allocation: Randomized|Intervention Model: Parallel Assignment|Masking: None (Open Label)|Primary Purpose: Supportive Care	2019-1234|NCI-2020-07368	2021-03-16	April 1, 2023	April 1, 2023	2021-01-05		2022-08-22	M D Anderson Cancer Center, Houston, Texas, United States		https://ClinicalTrials.gov/show/NCT04693377
204	NCT02097303	Open Label Phase Two Trial of Radium Ra 223 Dichloride With Concurrent Administration of Abiraterone Acetate Plus Prednisone in Symptomatic Castration-Resistant (Hormone-Refractory) Prostate Cancer Subjects With Bone Metastasis	eRADicAte	Completed	Has Results	Prostate Cancer	Drug: Concurrent use of Radium Ra 223 dichloride and Abiraterone Acetate plus Prednisone	Number and Percentage of Participants With Clinically Meaningful Improvement (Between Baseline and End of Treatment) in Quality-of-Life Determined by the Minimum Increase From Baseline in Scores as Per the QOL CMI Criteria|Number and Percentage of Participants With Clinically Meaningful Improvement (CMI) in Pain (Between Baseline and End of Treatment)|Safety Data Was Analyzed and Summarized in Su…	Carolina Research Professionals, LLC|Bayer	Male	18 Years and older (Adult, Older Adult)	Phase 2	36	Other|Industry	Interventional	Allocation: N/A|Intervention Model: Single Group Assignment|Masking: None (Open Label)|Primary Purpose: Treatment	CRP-PCA-01 eRADicAte	2023-03-14	2023-12-15	2023-12-15	2014-03-27	2018-02-01	2018-02-01	Chesapeake urology Research Associates, Towson, Maryland, United States|Urology Cancer Center and GU Research Network, Omaha, Nebraska, United States|Associated Medical Professionals, Syracuse, New York, United States|Oregon Urology Institute, Springfield, Oregon, United States|Carolina Urologic Research Center, Myrtle Beach, South Carolina, United States		https://ClinicalTrials.gov/show/NCT02097303
205	NCT02699697	Palliative Radiation Therapy in Reducing Pain in Patients With Bone Metastasis		Recruiting	No Results Available	Malignant Neoplasm|Metastatic Malignant Neoplasm in the Bone|Pain	Radiation: External Beam Radiation Therapy|Radiation: Palliative Radiation Therapy|Other: Quality-of-Life Assessment|Other: Questionnaire Administration	Change in narcotic use in daily oral morphine equivalents|Change in pain intensity assessed using the Numerical Rating Pain Scale|Change in quality of life measured using the quality of life questionnaire (QLQ) core(C)15-palliative (PAL) and QLQ-C30|Re-treatment rates	Wake Forest University Health Sciences|National Cancer Institute (NCI)	All	Child, Adult, Older Adult	Not Applicable	158	Other|NIH	Interventional	Allocation: Randomized|Intervention Model: Parallel Assignment|Masking: None (Open Label)|Primary Purpose: Supportive Care	IRB00037248|NCI-2016-00204|CCCWFU 01416|P30CA012197	2023-05-16	2023-09-22	2023-09-22	2016-03-04		2022-05-06	Comprehensive Cancer Center of Wake Forest University, Winston-Salem, North Carolina, United States		https://ClinicalTrials.gov/show/NCT02699697
206	NCT03887494	Study of the Impact of the Femoral Implant "Y-strut" on Lytic Bone Metastases of the Femoral Neck (WAZA-ARY)	WAZA-ARY	Unknown status	No Results Available	Neoplasms, Bone Tissue|Pain, Intractable|Hip Fractures	Device: Implantation	Measure of Quality of Life for each patient within one month after the implantation|Target lesion fracture within one month after the implantation|Target lesion fracture within 2 months after the implantation|Non-target femoral fracture within 2 months after the implantation|Non-target femoral fracture within one month after the implantation|Analgesic medication needs (type and dose) within one m…	Assistance Publique - Hôpitaux de Paris|Hyprevention	All	18 Years and older (Adult, Older Adult)	Not Applicable	15	Other|Industry	Interventional	Allocation: N/A|Intervention Model: Single Group Assignment|Masking: None (Open Label)|Primary Purpose: Supportive Care	K171014J|2018-A01901-54	2019-09-06	2020-05-22	2020-06-30	2019-03-25		2019-09-10			https://ClinicalTrials.gov/show/NCT03887494
207	NCT03496844	Fluciclovine-PET/CT for Bone Metastases From Prostate Adenocarcinoma	BoneMetPETCT	Completed	Has Results	Prostate Adenocarcinoma	Diagnostic Test: F-18 fluciclovine-PET/CT scan	True Positive and False Positive Rates of F-18 Fluciclovine-PET/CT Findings Compared to Bone Biopsy	University of Arizona|Blue Earth Diagnostics|Banner University Medical Center	Male	18 Years and older (Adult, Older Adult)	Not Applicable	15	Other|Industry	Interventional	Allocation: Non-Randomized|Intervention Model: Parallel Assignment|Masking: None (Open Label)|Primary Purpose: Diagnostic	1803340164	April 15, 2018	April 27, 2021	April 27, 2021	April 12, 2018	2022-08-09	2022-08-16	University of Arizona, Tucson, Arizona, United States	"Study Protocol and Statistical Analysis Plan", https://ClinicalTrials.gov/ProvidedDocs/44/NCT03496844/Prot_SAP_000.pdf	https://ClinicalTrials.gov/show/NCT03496844
208	NCT02135484	Radium 223 in Castrate Resistant Prostate Cancer Bone Metastases		Completed	Has Results	Prostate Cancer	Drug: Alpharadin	Overall Survival (Favorable and Unfavorable )	M.D. Anderson Cancer Center|Bayer|Prostate Cancer Foundation	Male	18 Years and older (Adult, Older Adult)	Not Applicable	27	Other|Industry	Interventional	Allocation: N/A|Intervention Model: Single Group Assignment|Masking: None (Open Label)|Primary Purpose: Treatment	2013-0933|NCI-2014-02016	2014-09-19	2020-11-11	2020-11-11	2014-05-12	2022-02-17	2022-02-17	University of Texas MD Anderson Cancer Center, Houston, Texas, United States	"Study Protocol and Statistical Analysis Plan", https://ClinicalTrials.gov/ProvidedDocs/84/NCT02135484/Prot_SAP_000.pdf	https://ClinicalTrials.gov/show/NCT02135484
209	NCT02803437	Drug Use Investigation of Xofigo, Castration Resistant Prostate Cancer With Bone Metastases		Active, not recruiting	No Results Available	Prostatic Neoplasms, Castration-Resistant	Drug: Radium-223 dichloride (Xofigo, BAY 88-8223)	Number of adverse events as a measure of safety|Number of adverse drug reactions as a measure of safety|Change in laboratory findings (e.g. ALP, bone markers)|Change in analgesic use as a surrogate of pain status|Number of patients with bone fractures|Survival rate|Post-treatment information	Bayer	Male	Child, Adult, Older Adult		334	Industry	Observational	Observational Model: Cohort|Time Perspective: Prospective	18212	2016-07-21	2022-12-31	2023-06-30	2016-06-17		2022-09-08	Multiple Locations, Japan		https://ClinicalTrials.gov/show/NCT02803437
210	NCT03062254	Metabolic Change in Prostate Cancer Bone Metastases on 68Ga-HBED-CC-PSMA PET/CT Following Radium-223 Therapy		Completed	No Results Available	Prostate Cancer	Drug: radium-223 dichloride	SUV-max	Sir Mortimer B. Davis - Jewish General Hospital	Male	18 Years to 100 Years (Adult, Older Adult)	Phase 2	14	Other	Interventional	Allocation: N/A|Intervention Model: Single Group Assignment|Masking: None (Open Label)|Primary Purpose: Basic Science	17-029	2018-03-22	2020-07-15	2021-07-15	2017-02-23		2021-09-21	Jewish General Hospital, Montreal, Quebec, Canada		https://ClinicalTrials.gov/show/NCT03062254
211	NCT03691493	Radiation Therapy, Palbociclib, and Hormone Therapy in Treating Breast Cancer Patients With Bone Metastasis	ASPIRE	Recruiting	No Results Available	Anatomic Stage IV Breast Cancer AJCC v8|Estrogen Receptor Positive|HER2/Neu Negative|Metastatic Breast Carcinoma|Metastatic Malignant Neoplasm in the Bone|Progesterone Receptor Positive|Prognostic Stage IV Breast Cancer AJCC v8	Drug: Anastrozole|Drug: Exemestane|Drug: Fulvestrant|Drug: Letrozole|Drug: Palbociclib|Radiation: Radiation Therapy|Drug: Tamoxifen	Response rate|Response rate incorporating BPI and analgesic measures according to International Bone Consensus Guideline Criteria|Incidence of adverse events graded according to Common Terminology Criteria for Adverse Events (CTCAE) version 5.0|Progression-free survival (PFS)|Overall survival (OS)|Fatigue as measured by The Multidimensional Fatigue Inventory (MFI)|Quality of life as measured by S…	Emory University|Pfizer	All	18 Years and older (Adult, Older Adult)	Phase 2	42	Other|Industry	Interventional	Allocation: N/A|Intervention Model: Single Group Assignment|Masking: None (Open Label)|Primary Purpose: Treatment	IRB00105944|NCI-2018-02000|Winship4472-18	2019-02-08	2022-08-10	2022-08-10	2018-10-01		2021-09-24	Grady Health System, Atlanta, Georgia, United States|Emory University Hospital Midtown, Atlanta, Georgia, United States|Piedmont Hospital, Atlanta, Georgia, United States|Emory University Hospital/Winship Cancer Institute, Atlanta, Georgia, United States|Emory Saint Joseph's Hospital, Atlanta, Georgia, United States|Northside Hospital, Atlanta, Georgia, United States|Augusta University Medical Ce…		https://ClinicalTrials.gov/show/NCT03691493
212	NCT05191264	Combination of Percutaneous Screw Fixation and Cementoplasty for Lytic Bone Metastases		Recruiting	No Results Available	Interventional Radiology	Other: EQ5D (EuroQol 5 Dimensions)|Other: Numerical Rating Scale (NRS)|Other: evaluated the consumption of analgesics	Technical feasibility of the procedure (Yes or No)|Adverse events|Numerical Rating Scale|EuroQol 5 Dimensions (EQ5D)|Consumption of opioids (mg/day)	Centre Hospitalier Universitaire de Saint Etienne	All	18 Years and older (Adult, Older Adult)		150	Other	Observational	Observational Model: Cohort|Time Perspective: Prospective	IRBN942019/CHUSTE	2019-07-10	2023-06-26	2023-06-26	2022-01-13		2022-01-28	CHU Saint-Etienne, Saint-Étienne, France		https://ClinicalTrials.gov/show/NCT05191264
213	NCT00434317	Assessment of Pain and Quality of Life in Breast and Prostate Cancer Patients With Bone Metastases		Completed	No Results Available	Neoplasm Metastasis	Drug: Zoledronic acid	Measurement of pain assessed by a Visual Analogue Scale (VAS)|Quality of Life assessment at baseline and last visit	Novartis	All	18 Years and older (Adult, Older Adult)	Phase 4	80	Industry	Interventional	Allocation: N/A|Intervention Model: Single Group Assignment|Masking: None (Open Label)|Primary Purpose: Treatment	CZOL446EHU03	2023-08-05	April 2008		2007-02-13		2017-02-23	Novartis Investigative Site, Budapest, Hungary|Novartis Investigative Site, Pecs, Hungary|Novartis Investigative Site, Szeged, Hungary|Novartis Investigative Site, Szekesfehervar, Hungary		https://ClinicalTrials.gov/show/NCT00434317
214	NCT03523351	Study of Palliative Radiation Therapy vs. no Palliative Radiation Therapy for Patients With High Risk Bone Metastases That Are Not Causing Significant Pain		Recruiting	No Results Available	Metastatic Solid Tumors of Metastatic Disease	Radiation: Radiation Therapy|Drug: Systemic Therapy	number of patients who have skeletal related events (SREs)	Memorial Sloan Kettering Cancer Center	All	18 Years and older (Adult, Older Adult)	Phase 1|Phase 2	78	Other	Interventional	Allocation: Randomized|Intervention Model: Parallel Assignment|Masking: None (Open Label)|Primary Purpose: Supportive Care	18-196	2018-05-01	2023-05-23	2023-05-23	2018-05-14		April 26, 2022	Baptist Alliance Miami Cancer Institute, Miami, Florida, United States|Memoral Sloan Kettering Basking Ridge, Basking Ridge, New Jersey, United States|Memorial Sloan Kettering Monmouth, Middletown, New Jersey, United States|Memorial Sloan Kettering Bergen, Montvale, New Jersey, United States|Memorial Sloan Kettering Commack, Commack, New York, United States|Memoral Sloan Kettering Westchester, Ha…		https://ClinicalTrials.gov/show/NCT03523351
215	NCT02622607	Preventive Effects of Zoledronic Acid on Bone Metastasis in Patients With Stage IIIB and IV Lung Cancer		Unknown status	No Results Available	Lung Cancer	Drug: Zoledronic acid	Percentage of Participants With Bone Metastases at 12 Months|Progression-Free Survival|Percentage of Participants With Overall Survival	Tang-Du Hospital	All	18 Years to 70 Years (Adult, Older Adult)	Phase 3	200	Other	Interventional	Allocation: Randomized|Intervention Model: Parallel Assignment|Masking: None (Open Label)|Primary Purpose: Prevention	ZOL	2023-01-13	2023-03-18	2023-03-18	2015-12-04		2017-07-21	Department of Oncology,Tangdu Hospital,Fourth Millitary Medical University, XI'an, Shaanxi, China		https://ClinicalTrials.gov/show/NCT02622607
216	NCT03317392	Testing the Safety of Different Doses of Olaparib Given Radium-223 for Men With Advanced Prostate Cancer With Bone Metastasis		Recruiting	No Results Available	Castration-Resistant Prostate Carcinoma|Metastatic Prostate Adenocarcinoma|Stage IVB Prostate Cancer AJCC v8	Other: Laboratory Biomarker Analysis|Drug: Olaparib|Other: Quality-of-Life Assessment|Radiation: Radium Ra 223 Dichloride	Maximum tolerated dose of olaparib and radium Ra 223 dichloride|Radiographic progression-free survival (rPFS)|Radiographic progression free survival (rPFS)|Prostate specific antigen (PSA) response|Alkaline phosphatase (ALP) response|Tumor response|Prostate specific antigen (PSA) progression|ALP progression|Symptomatic skeletal event (SSE)|Overall survival (OS)|Incidence of adverse events	National Cancer Institute (NCI)	Male	18 Years and older (Adult, Older Adult)	Phase 1|Phase 2	133	NIH	Interventional	Allocation: Randomized|Intervention Model: Parallel Assignment|Masking: None (Open Label)|Primary Purpose: Treatment	NCI-2017-01920|10096|UM1CA186689|UM1CA186709	2018-10-12	2022-11-30	2022-11-30	2017-10-23		2022-09-27	UC San Diego Moores Cancer Center, La Jolla, California, United States|University of California Davis Comprehensive Cancer Center, Sacramento, California, United States|Smilow Cancer Center/Yale-New Haven Hospital, New Haven, Connecticut, United States|Yale University, New Haven, Connecticut, United States|University of Kansas Clinical Research Center, Fairway, Kansas, United States|University of…		https://ClinicalTrials.gov/show/NCT03317392
217	NCT03487055	Safety Assessment of Repeated Administration of TK006 in Patients With Breast Cancer-related Bone Metastases		Unknown status	No Results Available	Breast Cancer	Biological: TK006	Incidence of adverse events(AEs)which are related to TK006 treatment throughout the study|immunogenicity	Jiangsu T-Mab Biopharma Co.,Ltd	All	18 Years to 65 Years (Adult, Older Adult)	Phase 1	30	Industry	Interventional	Allocation: N/A|Intervention Model: Single Group Assignment|Masking: None (Open Label)|Primary Purpose: Treatment	Tmab-TK006-102b	2023-05-18	2023-05-19	2023-05-19	April 3, 2018		April 3, 2018			https://ClinicalTrials.gov/show/NCT03487055
218	NCT03386916	CT Scan Guide Percutaneous Biopsy of Lytic Bone Metastases of Lung Cancer : Contribution in Pathology Diagnosis and Molecular Biology	stasfa	Unknown status	No Results Available	Image-Guided Biopsy - Carcinoma, Bronchogenic / Diagnosis- Outpatients	Procedure: CT scan guide percutaneous biopsy of lytic bone metastases of lung cancer	Rentability of biopsy of lytic bone lesion in anatomopathologic analysis|Rentability of biopsy of lytic bone lesion in molecular biology analysis inas much non small cell epidermoid lung cancer is diagnosed|Cell quality in sample of biopsy of lytic bone lesion in molecular biology analysis inas much non small cell epidermoid lung cancer is diagnosed|Complication rate linked to gesture of biopsy o…	University Hospital, Grenoble	All	Child, Adult, Older Adult		80	Other	Observational	Observational Model: Case-Only|Time Perspective: Retrospective	38RC17.218	2023-01-10	2023-06-17	2023-09-18	2017-12-29		2017-12-29			https://ClinicalTrials.gov/show/NCT03386916
219	NCT03127319	A Study of Apatinib Plus Docetaxel for Treatment of Advanced Non-squamous Non-small Cell Lung Cancer With Bone Metastases		Unknown status	No Results Available	Non-squamous Non-small Cell Lung Cancer	Drug: apatinib docetaxel zoledronic|Drug: docetaxel zoledronic	Progression free survival|Overall survival|DCR (Disease control rate)|ORR (Objective response rate)|SREs(Skeletal-related events)|Toxicity according to the Common Terminology Criteria for Adverse Events (CTCAE) Version 4.0	Affiliated Hospital of Hebei University	All	18 Years to 75 Years (Adult, Older Adult)	Phase 2	40	Other	Interventional	Allocation: Randomized|Intervention Model: Parallel Assignment|Masking: None (Open Label)|Primary Purpose: Treatment	AHHU-2017AMZ01	2017-07-03	April 2019	2023-12-19	April 25, 2017		2018-01-17	Affiliated Hospital of Hebei university, BaoDing, Hebei, China		https://ClinicalTrials.gov/show/NCT03127319
220	NCT03239756	Assessment of TK006 in Patients With Breast Cancer-related Bone Metastases		Unknown status	No Results Available	Breast Cancer	Biological: TK006	Frequency of adverse events (AEs) and serious adverse events (SAEs) which are related to TK006 assessed by CTCAE v4.03|Area under the plasma concentration-time curve from time zero to time 'last' where last is the last time point after administration [AUClast]|Area under the plasma concentration-time curve from time zero to infinity [AUC0-inf]|Maximum observed maximum plasma concentration [Cmax]|…	Jiangsu T-Mab Biopharma Co.,Ltd	All	18 Years to 65 Years (Adult, Older Adult)	Phase 1	40	Industry	Interventional	Allocation: Randomized|Intervention Model: Parallel Assignment|Masking: None (Open Label)|Primary Purpose: Treatment	Tmab-TK006-102	2017-07-20	2023-08-18	2023-08-18	2017-08-04		2017-08-23	the first affiliated hospital with Nanjing University, Nanjing, Jiangsu, China		https://ClinicalTrials.gov/show/NCT03239756
221	NCT02721433	4-weekly Versus 12-weekly Administration of Bone-targeted Agents in Patients With Bone Metastases	REaCT-BTA	Completed	No Results Available	Breast Cancer|Prostate Cancer|Metastasis	Drug: Pamidronate|Drug: Denosumab|Drug: Zoledronate	Health related quality of life scores measured with European Organization for Research and Treatment of Cancer (EORTC) QLQ-C30 Functional Domain (Physical Subdomain)|Pain will be measured through the EORTC-Quality of Life Questionnaire (QLQ)-BM22 (pain domain)|Health related quality of life scores|Time to development of symptomatic skeletal events (SSEs)|Total number of and time to subsequent on …	Ottawa Hospital Research Institute	All	19 Years and older (Adult, Older Adult)	Phase 4	263	Other	Interventional	Allocation: Randomized|Intervention Model: Single Group Assignment|Masking: None (Open Label)|Primary Purpose: Treatment	16-01	2023-08-16	2023-09-19	April 2020	2016-03-29		2020-12-02	The Ottawa Hospital Research Institute, Ottawa, Ontario, Canada		https://ClinicalTrials.gov/show/NCT02721433
222	NCT03134404	Project to Assess Feasibility of a Rapid Access Metastatic Bone Disease Program	RAMP	Withdrawn	No Results Available	Metastases to Bone	Other: No Intervention	Standardization of the referral pathways|Feasibility to triage MBD patients in currently existing musculoskeletal oncology clinics|Improve patient flow and timely access to care.|Improvement in symptom management and patient satisfaction	Ottawa Hospital Research Institute	All	18 Years and older (Adult, Older Adult)		0	Other	Observational	Observational Model: Cohort|Time Perspective: Prospective	FORM ID 6174	2017-11-01	2023-03-19	2023-03-20	2017-05-01		2020-08-06			https://ClinicalTrials.gov/show/NCT03134404
223	NCT02507570	Open Label Phase Two Study of Enzalutamide With Concurrent Administration of Radium Ra 223 Dichloride in Castration-Resistant (Hormone-Refractory) Prostate Cancer Subjects With Symptomatic Bone Metastasis		Completed	No Results Available	Prostate Carcinoma Metastatic to the Bone	Drug: Enzalutamide|Radiation: Radium ra 223 dichloride	Number of participants with adverse events and serious adverse events . Adverse events deemed to be related to either study medication will be followed until resolution.|Bone pain measured by the Bone Pain Index- Short Form questionnaire|Quality of Life Questionnaire|Time to measurable disease progression|Time to implementation of palliative radiotherapy|Time to analgesic (Opioid) advancements|Ti…	Carolina Research Professionals, LLC|Astellas Pharma Inc	Male	18 Years and older (Adult, Older Adult)	Phase 2	40	Other|Industry	Interventional	Allocation: N/A|Intervention Model: Single Group Assignment|Masking: None (Open Label)|Primary Purpose: Treatment	CRP-PCA-02 EnzaRadiCate	2015-09-23	2019-01-18	2019-01-18	2015-07-24		2019-03-19	Chesapeake Urology Research Associates, Towson, Maryland, United States|Associated Medical Professionals, Syracuse, New York, United States|Carolina Urologic Research Center, Myrtle Beach, South Carolina, United States|Urology of Virginia, PLLC, Virginia Beach, Virginia, United States		https://ClinicalTrials.gov/show/NCT02507570
224	NCT03520231	Study Comparing Denosumab With Standard Treatment in Urothelial Cancer Patients With Bone Metastases		Completed	No Results Available	Urothelial Carcinoma|Kidney Cancer|Ureter Cancer|Bladder Cancer	Drug: Denosumab|Other: Denosumab Placebo|Drug: Gemcitabine|Drug: Carboplatin|Drug: Cisplatin|Dietary Supplement: Calcium|Dietary Supplement: Vitamin D	Difference in mean percentage change in serum c-telopeptide (sCTX) between the two arms (investigational drug arm and placebo arm).|Number of patients with a change in sCTx|Mean percentage change in serum bone-specific alkaline phosphatase (bALP) in the investigational arm|Mean percentage change in urinary N-telopeptide (uNTx) levels in the investigational arm|Mean percentage change in sCTx level…	University Health Network, Toronto|Amgen	All	18 Years and older (Adult, Older Adult)	Phase 2	6	Other|Industry	Interventional	Allocation: Randomized|Intervention Model: Parallel Assignment|Masking: Double (Participant, Investigator)|Primary Purpose: Treatment	DENIM	2018-09-04	2020-12-01	2020-12-01	2018-05-09		2021-11-23	Princess Margaret Cancer Centre, Toronto, Ontario, Canada		https://ClinicalTrials.gov/show/NCT03520231
225	NCT01501630	Role of PET/CT With Fluorine-18 Tracers of Bone Metastases in Prostate Cancer	FLUPROSTIC	Completed	No Results Available	Prostate Cancer	Device: performance of PET/CT and whole-body MRI	bone metastases	Assistance Publique - Hôpitaux de Paris	Male	18 Years and older (Adult, Older Adult)		112	Other	Observational	Time Perspective: Prospective	P090105|2011-A01041-40	2023-12-11	2023-12-14	2023-12-14	2011-12-29		2015-10-14	Service Médecine Nucléaire - Hôpital TENON, Paris, France		https://ClinicalTrials.gov/show/NCT01501630
226	NCT01824342	Denosumab for Prolonging Bone Metastasis-Free Survival in Men With Hormone-Refractory Prostate Cancer		Completed	Has Results	Castrate-resistant Prostate Cancer	Biological: Denosumab	Number of Participants With Treatment-emergent Adverse Events (AEs) and Deaths|Percent Change From Baseline in Laboratory Values|Number of Participants With Anti-denosumab Neutralizing Antibody Formation|Change From Baseline in Eastern Cooperative Oncology Group (ECOG) Performance Status (PS)	Amgen	Male	18 Years and older (Adult, Older Adult)	Phase 3	18	Industry	Interventional	Allocation: N/A|Intervention Model: Single Group Assignment|Masking: None (Open Label)|Primary Purpose: Treatment	20080585|2010-021846-23	2023-01-11	2023-02-14	2023-02-14	April 4, 2013	2015-03-05	2015-03-05	Research Site, Hradec Kralove, Czech Republic|Research Site, Pelhrimov, Czech Republic|Research Site, Praha 2, Czech Republic|Research Site, Praha 6, Czech Republic|Research Site, Tabor, Czech Republic|Research Site, Newcastle, United Kingdom|Research Site, Northwood, United Kingdom|Research Site, Sheffield, United Kingdom|Research Site, Sutton, United Kingdom		https://ClinicalTrials.gov/show/NCT01824342
227	NCT02963675	Incidence of Second Primary Malignancies in Prostate Cancer Patients With Bone Metastases - an Observational Retrospective Cohort Study in Sweden	SMARCOS	Completed	No Results Available	Prostatic Neoplasms		Incidences of Second primary malignancies that are characterized by the following ICD-10 codes: C00-C76, C81-C96, D00-D09, D37-D48.|Incidences of any site-specific second primary malignancies|Overall survival|Pathologic fracture|Spinal cord compression|Surgery to bone|Radiation to bone	Bayer	Male	18 Years and older (Adult, Older Adult)		15953	Industry	Observational	Observational Model: Cohort|Time Perspective: Retrospective	18105	2016-11-15	2017-03-31	2017-03-31	2016-11-15		2018-02-12	Multiple Locations, Sweden		https://ClinicalTrials.gov/show/NCT02963675
228	NCT03070002	Denosumab in Treating Patients With ER and/or PR Positive, HER2 Negative Metastatic Breast Cancer With Bone Metastases and Detectable Circulating Tumor Cells		Terminated	Has Results	Breast Carcinoma Metastatic in the Bone|Circulating Tumor Cell Count|Estrogen Receptor Positive|HER2/Neu Negative|Progesterone Receptor Positive|Stage IV Breast Cancer	Biological: Denosumab|Other: Laboratory Biomarker Analysis	Fraction of Patients With Reduction in CTCs|Percent Change in CTCs|Median Progression Free Survival	Northwestern University|Amgen|National Cancer Institute (NCI)	All	18 Years and older (Adult, Older Adult)	Phase 2	1	Other|Industry|NIH	Interventional	Allocation: N/A|Intervention Model: Single Group Assignment|Masking: None (Open Label)|Primary Purpose: Treatment	NU 16B09|STU00203216|P30CA060553|NCI-2017-00015	2017-10-19	2018-03-06	April 24, 2018	2017-03-03	2018-11-20	2018-11-20	Northwestern University, Chicago, Illinois, United States|Northwestern University- Lake Forest Hospital, Lake Forest, Illinois, United States	"Study Protocol and Statistical Analysis Plan", https://ClinicalTrials.gov/ProvidedDocs/02/NCT03070002/Prot_SAP_000.pdf	https://ClinicalTrials.gov/show/NCT03070002
229	NCT02553850	An Observational Study in Patients With Breast Cancer and Bone Metastases Receiving Ibandronate (Bondronat)		Completed	No Results Available	Breast Cancer		Beta C-terminal telopeptide (B-CTx) level|Treatment response rate|Number of patients who died due to progression of breast cancer|Safety: Incidence of adverse events	Hoffmann-La Roche	All	18 Years and older (Adult, Older Adult)		442	Industry	Observational	Observational Model: Cohort|Time Perspective: Prospective	ML20416	April 2007	2023-01-10	2023-01-10	2015-09-18		2016-11-01	Budapest, Hungary|Budapest, Hungary|Budapest, Hungary|Budapest, Hungary|Debrecen, Hungary|Gyor, Hungary|Gyula, Hungary|Kaposvar, Hungary|Nyíregyháza, Hungary|Pecs, Hungary|Szeged, Hungary|Szeged, Hungary|Szekesfehervar, Hungary|Szekszard, Hungary|Szolnok, Hungary|Szombathely, Hungary|Tatabánya, Hungary|Veszprem, Hungary|Zalaegerszeg-Pozva, Hungary		https://ClinicalTrials.gov/show/NCT02553850
230	NCT03208712	Radium-223 and Atezolizumab in Patients With Urothelial Carcinoma With Bone Metastases Who Have Had Disease Progression After Platinum-Based Chemotherapy		Terminated	No Results Available	Urothelial Carcinoma	Drug: Atezolizumab|Drug: Radium-223	Percent of Patients that respond to Treatment|Median Overall Survival Time|Median Progression Free Survival Time|Number of Patients with Complete Response|Change in QOL Score From Baseline	University of Michigan Rogel Cancer Center	All	18 Years and older (Adult, Older Adult)	Early Phase 1	1	Other	Interventional	Allocation: N/A|Intervention Model: Single Group Assignment|Masking: None (Open Label)|Primary Purpose: Treatment	UMCC 2017.023|HUM00126822	2017-11-01	2018-08-02	2018-08-02	2017-07-05		2018-10-24	University of Michigan Comprehensive Cancer Center, Ann Arbor, Michigan, United States		https://ClinicalTrials.gov/show/NCT03208712
231	NCT04549207	Comparing Continuation or De-escalation of Bone Modifying Agents (BMA) in Patients Treated for Over 2 Years for Bone Metastases From Either Breast or Castration-resistant Prostate Cancer		Recruiting	No Results Available	Breast Cancer|Castration-resistant Prostate Cancer	Drug: Bone modifying agent	Health related quality of life scores|Symptomatic Skeletal Event (SSE)|Time to development of Symptomatic Skeletal Event|Symptomatic Skeletal Event-free survival|Skeletal morbidity|Quality of life of cancer patients using the EORTC-QLQ-C30|Quality of life of cancer patients using the EORTC-QLQ-BM22|BMA-related toxicity rates|Incremental cost-effectiveness rations	Ottawa Hospital Research Institute	All	18 Years and older (Adult, Older Adult)	Phase 4	240	Other	Interventional	Allocation: Randomized|Intervention Model: Parallel Assignment|Masking: None (Open Label)|Primary Purpose: Treatment	REaCT-Hold BMA	2020-10-09	2023-11-23	2023-11-24	2020-09-16		April 21, 2022	The Ottawa Hospital Cancer Centre, Ottawa, Ontario, Canada		https://ClinicalTrials.gov/show/NCT04549207
232	NCT02484339	Treatment of Advanced Castration Resistant Prostate Carcinoma With Limited Bone Metastases (a-RT)	a-RT	Unknown status	No Results Available	Prostate Carcinoma	Drug: Radium-223 dichloride|Other: Conventional or high dose radiotherapy	Time to radiological progression free survival (PFS) rate|Time to local progression in any of the EBRT treated bone metastases of conventional radiotherapy (CRT) vs. High-dose image-based conformal radiotherapy (HIRT) treatment techniques|Overall survival|Time to distant bone metastasis progression outside the RT target volumes|Time to Skeletal Related Event (SRE)|Pain control|Disease Control Rat…	University Hospital Freiburg	Male	18 Years to 85 Years (Adult, Older Adult)	Phase 2	274	Other	Interventional	Allocation: Randomized|Intervention Model: Parallel Assignment|Masking: None (Open Label)|Primary Purpose: Treatment	a-RT	2023-12-14	2023-12-16	2023-12-17	2015-06-29		April 27, 2016	Universitätsklinikum "Carl Gustav Carus" der Technischen Universität Dresden, Dresden, Germany|Universitätsklinikum Freiburg, Klinik für Strahlenheilkunde, Freiburg, Germany|Universitätsmedizin Mainz, Klinik und Poliklinik für Nuklearmedizin, Mainz, Germany|Klinikum der Universität München, München, Germany|Universitätsklinikum Tübingen, Tübingen, Germany|Universitätsklinikum Würzburg, Würzburg, …		https://ClinicalTrials.gov/show/NCT02484339
233	NCT00429507	Sm-EDTMP and Autologous Peripheral Blood Stem Cell Transplantation for Breast Cancer Patients With Bone Only Metastases		Completed	Has Results	Breast Cancer|Bone Metastases	Drug: 153 Sm-EDTMP|Behavioral: Questionnaire|Procedure: Stem Cell Transplant	Time to Progression	M.D. Anderson Cancer Center|Cytogen Corporation	All	18 Years to 65 Years (Adult, Older Adult)	Phase 2	12	Other|Industry	Interventional	Allocation: N/A|Intervention Model: Single Group Assignment|Masking: None (Open Label)|Primary Purpose: Treatment	2006-0349|NCI-2010-00573	2023-03-07	2023-11-14	2023-11-14	2007-01-31	2015-11-24	2015-11-24	University of Texas MD Anderson Cancer Center, Houston, Texas, United States		https://ClinicalTrials.gov/show/NCT00429507
234	NCT00420433	Bone Response in Metastatic Breast Cancer Involving Bones		Completed	No Results Available	Breast Cancer|Bone Metastases	Procedure: Skeletal Scintigraphy|Procedure: Radiography|Procedure: CT Scan	To compare different imaging techniques in measuring the response of bone disease to treatment.|To compare different evaluation techniques (evaluation criteria) in reading the images.|To study the change in the response of blood serum markers and the reliability of biochemical markers.	M.D. Anderson Cancer Center	All	Child, Adult, Older Adult		37	Other	Observational	Observational Model: Case-Only|Time Perspective: Prospective	2003-0999	2023-09-04	2023-10-08	2023-05-12	2007-01-11		2016-02-19	UT MD Anderson Cancer Center, Houston, Texas, United States		https://ClinicalTrials.gov/show/NCT00420433
235	NCT01219790	ZOLEDRONIC ASSOCIATED With Hight Hypofractionated Radiotherapy Dose in Bone Metastases Vertebral Prostate Adenocarcinoma	GEMO	Completed	No Results Available	Prostate Adenocarcinoma	Radiation: external radiotherapy|Drug: Acide zoledronic	Neurological toxicity was defined as NCI-CTC grade V4.de greater than 2.	Institut Cancerologie de l'Ouest	Male	18 Years and older (Adult, Older Adult)	Phase 1	30	Other	Interventional	Allocation: N/A|Intervention Model: Single Group Assignment|Masking: None (Open Label)|Primary Purpose: Treatment	BRD 10/2-S	2023-10-10	2023-11-14	2023-11-15	2010-10-13		April 19, 2016	Centre Paul Papin, Angers, France|Centre Léon Bérard, Lyon, France|Centre René Gauducheau, Saint Herblain, France		https://ClinicalTrials.gov/show/NCT01219790
236	NCT00172029	Study Comparing Full-dose Radiotherapy Versus Reduced Dose in the Management of Bone Metastasis in Patients With Breast Cancer Receiving Zoledronic Acid		Completed	No Results Available	Breast Cancer With Metastatic Bone Disease	Drug: Zoledronic acid	Percentage of patients showing complete response in bone pain palliation without having any analgesic treatment	Novartis	Female	18 Years and older (Adult, Older Adult)	Phase 4	116	Industry	Interventional	Allocation: Randomized|Intervention Model: Parallel Assignment|Masking: None (Open Label)|Primary Purpose: Treatment	CZOL446ETR01	April 2003	2023-09-05		2005-09-15		2010-03-29	Novartis Investigative Site, Ankara, Turkey|Novartis Investigative Site, Antalya, Turkey|Novartis Investigative Site, Bursa, Turkey|Novartis Investigative Site, Istanbul, Turkey|Novartis Investigative Site, Izmir, Turkey|Novartis Investigative Site, Kayseri, Turkey|Novartis Investigative Site, Trabzon, Turkey		https://ClinicalTrials.gov/show/NCT00172029
237	NCT01934790	Re-treatment Safety of Radium-223 Dichloride in Castration-resistant Prostate Cancer With Bone Metastases		Completed	Has Results	Prostatic Neoplasms	Drug: Radium-223 dichloride (Xofigo, BAY88-8223)	Number of Participants With Treatment-emergent Adverse Events (AEs)|Number of Participants With Treatment-emergent Serious Adverse Events (SAEs)|Number of Participants With Radium-223 Dichloride-related AEs in the Active Follow-up Period|Number of Participants With Radium-223 Dichloride-related SAEs in the Active Follow-up Period|Number of Participants With High/Low Abnormalities in Hematology Va…	Bayer	Male	18 Years and older (Adult, Older Adult)	Phase 1|Phase 2	45	Industry	Interventional	Allocation: N/A|Intervention Model: Single Group Assignment|Masking: None (Open Label)|Primary Purpose: Treatment	16506|2013-003046-17	2013-12-22	2015-06-04	April 12, 2017	2013-09-04	2016-09-29	2018-03-26	New Orleans, Louisiana, United States|Omaha, Nebraska, United States|Syracuse, New York, United States|Kuopio, Finland|Haifa, Israel|Jerusalem, Israel|Kfar Saba, Israel|Petah Tikva, Israel|Forlì-Cesena, Emilia-Romagna, Italy|Milano, Lombardia, Italy|Bergen, Norway|Lørenskog, Norway|Córdoba, Andalucía, Spain|Barcelona, Spain|Málaga, Spain|Umeå, Sweden		https://ClinicalTrials.gov/show/NCT01934790
238	NCT00391690	Evaluation of Bone Markers as Diagnostic Tools for Early Detection of Bone Metastases in Patients With High Risk Prostate Cancer		Completed	No Results Available	Prostate Cancer	Drug: Zoledronic acid	? To assess the relationship between change in bone parameters and bone scan with respect to bone metastases|Assessment of course of bone parameters (PINP, amino-terminal propeptide of procollagen type 1) and (ICTP, Pyridinoline cross-linked carboxyterminal telopeptide of type I collagen)|Assessment of course of Prostate-specific antigen (PSA)|Assessment of correlation of bone parameters and PSA|…	Novartis	Male	18 Years and older (Adult, Older Adult)	Phase 4	99	Industry	Interventional	Allocation: Non-Randomized|Intervention Model: Single Group Assignment|Masking: None (Open Label)|Primary Purpose: Treatment	CZOL446GDE22	2023-02-06	2023-12-10		2006-10-24		2016-11-18	Novartis Investigative Site, Tuebingen, Germany		https://ClinicalTrials.gov/show/NCT00391690
239	NCT00091832	Denosumab (AMG 162) in Bisphosphonate Naive Metastatic Breast Cancer		Completed	Has Results	Breast Cancer|Metastases|Bone Metastases in Subjects With Advanced Breast Cancer	Biological: Denosumab|Drug: IV Bisphosphonates	Percent Change From Baseline to Week 13 in Creatinine-adjusted Urinary N-telopeptide (uNTx/Cr)|Percent Change From Baseline to Week 25 in Urinary N-telopeptide (uNTx)|Number of Participants Achieving 65% or More Reduction in Urinary N-telopeptide (uNTx) From Baseline at Week 13|Number of Participants Achieving 65% or More Reduction in uNTX From Baseline at Week 25|Time to 65% or More Reduction in…	Amgen	Female	18 Years and older (Adult, Older Adult)	Phase 2	255	Industry	Interventional	Allocation: Randomized|Intervention Model: Parallel Assignment|Masking: Quadruple (Participant, Care Provider, Investigator, Outcomes Assessor)|Primary Purpose: Supportive Care	20040113	2023-09-04	2023-11-05	2023-10-06	2004-09-21	2011-01-07	2014-01-28			https://ClinicalTrials.gov/show/NCT00091832
240	NCT02832830	Image-guided and Intensity-modulated Radiotherapy Versus External Beam Radiotherapy for Patients With Spine Metastases	IRON-1	Unknown status	No Results Available	Vertebral Bony Metastases	Radiation: IMRT|Radiation: fractionated RT	quality of life|bone density|pain reduction|Fatigue	Heidelberg University	All	18 Years to 85 Years (Adult, Older Adult)	Phase 2	60	Other	Interventional	Allocation: Randomized|Intervention Model: Parallel Assignment|Masking: None (Open Label)|Primary Purpose: Treatment	IRON-1	2023-08-16	2023-01-18	2023-01-20	2016-07-14		2016-07-14	Dept of Radiation Oncology, University of Heidelberg, Germany, Heidelberg, Germany		https://ClinicalTrials.gov/show/NCT02832830
241	NCT00936975	Fluorine F 18 Sodium Fluoride Positron Emission Tomography in Evaluating Response to Dasatinib in Patients With Prostate Cancer and Bone Metastases		Completed	Has Results	Hormone-Resistant Prostate Cancer|Metastatic Malignant Neoplasm in the Bone|Recurrent Prostate Carcinoma|Stage IV Prostate Cancer	Radiation: Fluorine F 18 Sodium Fluoride	Changes in 18F-fluoride PET (SUV) - Tumor Bone|Changes in 18F-fluoride PET SUV - Normal Bone|Changes in 18F-fluoride Ki - Tumor Bone|Changes in 18F-fluoride Ki - Normal Bone|Changes in 18F-fluoride Transport (by Patlak Flux) - Tumor|Changes in 18F-fluoride Transport (by Patlak Flux) - Normal	National Cancer Institute (NCI)	Male	18 Years and older (Adult, Older Adult)	Phase 2	18	NIH	Interventional	Allocation: N/A|Intervention Model: Single Group Assignment|Masking: None (Open Label)|Primary Purpose: Diagnostic	NCI-2010-01292|CDR0000647592|ACRIN 6687|ACRIN-6687|U01CA080098|U10CA180820	2023-09-09	2023-06-14	2023-12-14	2009-07-10	2015-07-16	2015-07-16	Dana-Farber Cancer Institute, Boston, Massachusetts, United States|Duke University Medical Center, Durham, North Carolina, United States|Oregon Health and Science University, Portland, Oregon, United States|University of Washington Medical Center, Seattle, Washington, United States		https://ClinicalTrials.gov/show/NCT00936975
242	NCT00692458	A Study to Assess the Effects of MK0822 in Reducing the Risk of Bone Metastasis in Women With Breast Cancer (0822-029)		Withdrawn	No Results Available	Breast Cancer	Drug: Comparator: odanacatib|Drug: Comparator: placebo	to assess the effect of treatment with MK0822 5 mg once daily on the risk of developing a first bone metastasis compared to placebo|to assess the effect of treatment with MK0822 5 mg once daily on disease-free survival compared to placebo	Merck Sharp & Dohme LLC	Female	18 Years and older (Adult, Older Adult)	Phase 3	0	Industry	Interventional	Allocation: Randomized|Intervention Model: Parallel Assignment|Masking: Double (Participant, Investigator)|Primary Purpose: Prevention	0822-029|2008_526|MK-0822-029	2023-09-08	2023-09-08	2023-09-08	2008-06-06		2016-08-12			https://ClinicalTrials.gov/show/NCT00692458
243	NCT00697619	To Evaluate the Efficacy of ZOMETA® in Treatment of Bone Metastases in Patients With Stage IV Nasopharyngeal Cancer		Completed	Has Results	Nasopharyngeal Cancer	Drug: Zometa (zoledronic acid)	Comparing the Level of Urinary N-telopeptide (uNTx) in the Two Arms .	Sun Yat-sen University|Novartis	All	18 Years to 75 Years (Adult, Older Adult)	Phase 2	60	Other|Industry	Interventional	Allocation: Randomized|Intervention Model: Parallel Assignment|Masking: None (Open Label)|Primary Purpose: Treatment	CZOL446ECN02	2023-09-05	2023-01-09	2023-09-09	2008-06-16	2012-03-02	2012-03-07	Li Zhang, Guangzhou, Guangdong, China		https://ClinicalTrials.gov/show/NCT00697619
244	NCT00874211	S0702: Osteonecrosis of the Jaw in Patients With Cancer Receiving Zoledronic Acid for Bone Metastases		Completed	No Results Available	Breast Cancer|Lung Cancer|Metastatic Cancer|Multiple Myeloma|Plasma Cell Neoplasm|Prostate Cancer|Unspecified Adult Solid Tumor, Protocol Specific	Procedure: assessment of therapy complications	Diagnosis of confirmed osteonecrosis of the jaw (ONJ)|Disease-specific estimates of the confirmed cumulative incidence at 3 years of ONJ|Clinical presentation and natural history of ONJ|Overall and disease-specific cumulative incidence|Association of baseline factors with cumulative incidence of confirmed ONJ|Association between patient-related outcomes and confirmed incidence	Southwest Oncology Group|National Cancer Institute (NCI)|Novartis	All	up to 120 Years (Child, Adult, Older Adult)		3571	Other|NIH|Industry	Observational	Observational Model: Cohort|Time Perspective: Prospective	S0702|U10CA037429	2023-12-08	2023-06-19	2023-06-19	April 2, 2009		2019-07-05	Regional Medical Center, Anniston, Alabama, United States|Providence Cancer Center at Providence Hospital, Mobile, Alabama, United States|Providence Cancer Center, Anchorage, Alaska, United States|Fairbanks Cancer Treatment Center at Fairbanks Memorial Hospital, Fairbanks, Alaska, United States|NEA Medical Clinic - East Matthews, Jonesboro, Arkansas, United States|Arkansas Cancer Research Center …
245	NCT00264082	Assessment of Tartrate-Resistant Acid Phosphatase (TRAP) as a Bone Resorption Marker in Stage IV Breast Cancer Patients With Bone Metastasis		Completed	No Results Available	Breast Cancer	Drug: Zometa(drug)		University of Louisville|James Graham Brown Cancer Center	Female	18 Years and older (Adult, Older Adult)		30	Other	Observational	Time Perspective: Other	419.04	2023-09-04	2023-05-06		2005-12-12		2017-12-29	James Graham Brown Cancer Center, 529 S. Jackson St., Louisville, Kentucky, United States		https://ClinicalTrials.gov/show/NCT00264082
246	NCT00691899	A Study to Assess the Effects of MK0822 in Prolonging Time to First Bone Metastasis in Men With Castration-Resistant Prostate Cancer (0822-030)		Withdrawn	No Results Available	Prostate Cancer	Drug: odanacatib|Drug: placebo (unspecified)	To assess the effect of treatment with MK0822 5 mg once daily on bone metastasis-free survival (i.e., the risk of developing a first bone metastasis or dying from any cause) compared to placebo|To assess the effect of treatment with MK0822 5 mg once daily on the risk of developing a first bone metastasis compared to placebo	Merck Sharp & Dohme LLC	Male	18 Years and older (Adult, Older Adult)	Phase 3	0	Industry	Interventional	Allocation: Randomized|Intervention Model: Parallel Assignment|Masking: Double (Participant, Investigator)|Primary Purpose: Prevention	0822-030|2006_533|MK-0822-030	2023-09-08	2023-09-08	2023-09-08	2008-06-06		2016-08-12			https://ClinicalTrials.gov/show/NCT00691899
247	NCT02616016	MRI Guided HIFU for Palliation of Painful Skeletal Metastases in Children		Recruiting	No Results Available	Bone Metastases|Pain	Device: MRI Guided High Intensity Focused Ultrasound	Change in pain intensity scores from baseline as measured on pain diaries.|Improved patient quality of life after MR-HIFU using a quality of life questionnaire.	The Hospital for Sick Children|Sunnybrook Health Sciences Centre	All	5 Years to 17 Years (Child)	Not Applicable	10	Other	Interventional	Allocation: N/A|Intervention Model: Single Group Assignment|Masking: None (Open Label)|Primary Purpose: Treatment	1000040604	April 2014	April 2022	April 2022	2015-11-26		2021-07-14	The Hospital for Sick Children, Toronto, Ontario, Canada		https://ClinicalTrials.gov/show/NCT02616016
248	NCT00554229	A Phase III Trial of ZD4054 (Zibotentan) (Endothelin A Antagonist) in Hormone Resistant Prostate Cancer With Bone Metastases	ENTHUSE M1	Completed	Has Results	Prostate Cancer	Drug: ZD4054|Drug: Placebo	Overall Survival|Progression Free Survival|Time to Use of Opiates|Incidence of Skeletal Related Events|Bone Metastases Formation|Health Related Quality of Life|Time to Prostate-specific Antigen (PSA) Progression|Time to Pain Progression|Time to Initiation of Chemotherapy|Pharmacokinetic Characteristics of ZD4054	AstraZeneca	Male	18 Years and older (Adult, Older Adult)	Phase 3	896	Industry	Interventional	Allocation: Randomized|Intervention Model: Parallel Assignment|Masking: Quadruple (Participant, Care Provider, Investigator, Outcomes Assessor)|Primary Purpose: Treatment	D4320C00014|2007-003227-20	2023-11-07	2023-07-10	2023-08-11	2007-11-06	2012-05-31	2016-02-08	Research Site, Tucson, Arizona, United States|Research Site, Greenbrae, California, United States|Research Site, Los Angeles, California, United States|Research Site, Palm Springs, California, United States|Research Site, San Mateo, California, United States|Research Site, Norwich, Connecticut, United States|Research Site, Washington, District of Columbia, United States|Research Site, Gainsville,…		https://ClinicalTrials.gov/show/NCT00554229
249	NCT05381077	Evaluation of Whole Body Examination by MRI Integrating the "Zero Time Eco" Sequence (ZTE, Pseudo-CT) for the Detection of Bone Lesions in Multiple Myeloma: Comparison With Pet / CT and Whole Body Scanner	MM-ZTE	Recruiting	No Results Available	Multiple Myeloma|Bone Metastases	Other: MRI	Evaluation of the diagnostic performance of the different imaging protocols|Comparison of Sensitivity (Se) and Predictive Precision (Acc) of the different imaging protocols	Cliniques universitaires Saint-Luc- Université Catholique de Louvain	All	18 Years to 99 Years (Adult, Older Adult)	Not Applicable	30	Other	Interventional	Allocation: N/A|Intervention Model: Single Group Assignment|Masking: None (Open Label)|Primary Purpose: Diagnostic	2020/27JUL/380	2021-02-02	2023-08-31	2023-08-31	2022-05-19		2022-05-19	Cliniques Universaires Siant Luc, Brussels, Belgium		https://ClinicalTrials.gov/show/NCT05381077
250	NCT05301062	A Research Called CREDIT Studies How Safe the Study Treatment Radium-223 is and How Well it Works in Chinese Men With Advanced Prostate Cancer That Has Spread to the Bones and Does Not Respond to Treatments for Lowering Testosterone Levels	CREDIT	Recruiting	No Results Available	Metastatic Castration-resistant Prostate Cancer|Bone Metastases	Drug: Radium-223 dichloride (Xofigo, BAY88-8223)	Incidence of hematological adverse events|Incidence of other treatment-emergent Adverse events (AEs) and Serious Adverse Events (SAEs)|Overall Survival (OS)|Change in pain severity|Time interval from the last administration of Radium-223 to the initiation date of next anti-cancer therapy	Bayer	Male	Child, Adult, Older Adult		120	Industry	Observational	Observational Model: Cohort|Time Perspective: Prospective	21720	2022-09-15	2024-06-30	2024-09-30	2022-03-29		2022-09-29	Many locations, Multiple Locations, China		https://ClinicalTrials.gov/show/NCT05301062
251	NCT00219219	Zoledronic Acid in the Prevention of Skeletal-related Events in Hormone Refractory and Hormone-sensitive Prostate Cancer Patients With Bone Metastases		Completed	No Results Available	Prostate Cancer	Drug: Zoledronic acid	occurence of skeletale related events (SREs) over time (time to first SRE,skeletal morbidity rate and proportion of patients experiencing SRE)|Bone pain|Use of analgesic medication and ECOG performance status every three months|Bone specific alkaline phosphatase, serum N-telopeptide and parathyroid hormone will be evaluated after one month of treatment and then every three months	Novartis|Società Italiana di Urologia (SIU)	Male	18 Years and older (Adult, Older Adult)	Phase 4		Industry|Other	Interventional	Allocation: Non-Randomized|Intervention Model: Single Group Assignment|Masking: None (Open Label)|Primary Purpose: Treatment	CZOL446EIT04	2023-09-03		2023-10-06	2005-09-22		April 14, 2015	Bologna, Bologna, Italy		https://ClinicalTrials.gov/show/NCT00219219
252	NCT02999152	Validation of Radio-induced Damage Biomarkers	BIOM-DRI	Terminated	No Results Available	Bone Metastasis|Malignant Hemopathy	Other: blood and urines samples	Level of haematological and biochemical markers|Quantification of chromosomal aberrations|Detection of biochemical markers|Metabolomics markers levels|Total dose of radiation|Radiation field	Centre Hospitalier Universitaire de Saint Etienne|Institut de Recherche Biomedicale des Armees|Institut de Cancérologie de la Loire	All	18 Years to 70 Years (Adult, Older Adult)	Not Applicable	16	Other	Interventional	Allocation: Non-Randomized|Intervention Model: Parallel Assignment|Masking: None (Open Label)|Primary Purpose: Prevention	2016-0901|2016-A01446-45	2017-06-22	2020-06-15	2020-06-15	2016-12-21		2022-02-22	Institut de Cancérologie Lucien Neuwirth, Saint-Priest en Jarez, France|Institut Gustave Roussy, Villejuif, France		https://ClinicalTrials.gov/show/NCT02999152
253	NCT04995614	Health-related Quality of Life, Psychological Distress and Fatigue in Metastatic CRPC Patients Treated With Radium-223		Completed	No Results Available	Castrate Resistant Prostate Cancer|Bone Metastases	Drug: Radium-223	Cancer-specific health-related quality of life|Bone metastases related health-related quality of life|Intensity and location of bone pain|Psychological distress|Fatigue	Radboud University Medical Center|Bayer	Male	18 Years and older (Adult, Older Adult)		122	Other|Industry	Observational	Observational Model: Cohort|Time Perspective: Prospective	AURIMPCA-2|MOURO27	April 1, 2017	2020-06-29	2020-06-29	2021-08-09		2021-08-09	Jeroen Bosch Ziekenhuis, 's-Hertogenbosch, Netherlands|Ziekenhuisgroep Twente, Almelo, Netherlands|Rijnstate ziekenhuis, Arnhem, Netherlands|Reinier de Graaf Gasthuis, Delft, Netherlands|Catharina ziekenhuis, Eindhoven, Netherlands|Universitair medisch centrum Groningen, Groningen, Netherlands|Medisch Centrum Leeuwarden, Leeuwarden, Netherlands|Canisius-Wilhelmina ziekenhuis, Nijmegen, Netherland…		https://ClinicalTrials.gov/show/NCT04995614
254	NCT00079001	Zoledronate in Preventing Skeletal (Bone)-Related Events in Men Who Are Receiving Androgen Deprivation Therapy For Prostate Cancer and Bone Metastases		Completed	Has Results	Metastatic Cancer|Prostate Cancer	Drug: zoledronic acid|Other: placebo|Drug: androgen deprivation therapy|Drug: GnRH agonist|Dietary Supplement: Calcium supplement|Dietary Supplement: Vitamin D	Time to First Skeletal Related Event|Overall Survival|Progression-free Survival	Alliance for Clinical Trials in Oncology|National Cancer Institute (NCI)|Southwest Oncology Group|Eastern Cooperative Oncology Group|NCIC Clinical Trials Group|Novartis Pharmaceuticals	Male	18 Years and older (Adult, Older Adult)	Phase 3	645	Other|NIH|Industry	Interventional	Allocation: Randomized|Intervention Model: Parallel Assignment|Masking: Quadruple (Participant, Care Provider, Investigator, Outcomes Assessor)|Primary Purpose: Treatment	CALGB-90202|U10CA031946|CAN-NCIC-PRC2|CDR0000353209	2023-01-04	2023-07-12	2023-10-14	2004-03-09	2014-10-30	2020-05-12	Providence Cancer Center at Providence Hospital, Mobile, Alabama, United States|Hembree Mercy Cancer Center at St. Edward Mercy Medical Center, Fort Smith, Arkansas, United States|Arkansas Cancer Research Center at University of Arkansas for Medical Sciences, Little Rock, Arkansas, United States|Veterans Affairs Medical Center - Loma Linda (Pettis), Loma Linda, California, United States|Pismo Bea…		https://ClinicalTrials.gov/show/NCT00079001
255	NCT03223597	Registry of Treatment Outcomes of Symptomatic Metastasized Castration Resistant Prostate Cancer Treated With Radium-223	ROTOR	Completed	No Results Available	Prostate Cancer Metastatic|Bone Metastases	Drug: Radium-223 dichloride	Reported analgesic use and pain outcome|Efficacy on clinical parameters of treatment with Radium-223|Number of participants with treatment-related adverse events as assessed by CTCAE v4.0|Subsequent therapy after Radium-223: Number of participants with treatment-related adverse events as assessed by CTCAE v4.0|Efficacy of subsequent treatment on clinical parameters|Symptomatic Skeletal Events|Eva…	The Netherlands Cancer Institute|Bayer	Male	18 Years and older (Adult, Older Adult)		300	Other|Industry	Observational	Observational Model: Cohort|Time Perspective: Prospective	m14ROT	2015-01-17	2015-02-01	2018-03-01	2017-07-21		April 15, 2022	Meander Medical Center, Amersfoort, Utrecht, Netherlands|Jeroen Bosch Hospital, 's Hertogenbosch, Netherlands|Noordwest Ziekenhuisgroep, Alkmaar, Netherlands|Zorggroep Twente, Almelo, Netherlands|The Netherlands Cancer Intitute, Amsterdam, Netherlands|Rijnstate, Arnhem, Netherlands|Amphia Ziekenhuis, Breda, Netherlands|Reinier de Graaf Hospital, Delft, Netherlands|Deventer Ziekenhuis, Deventer, N…		https://ClinicalTrials.gov/show/NCT03223597
256	NCT03694015	SUPR-3D: Simple Unplanned Palliative Radiotherapy Versus 3D Conformal Radiotherapy for Patients With Bone Metastases		Recruiting	No Results Available	Neoplasm Metastasis|Neoplastic Processes|Neoplasms|Pathologic Processes	Radiation: SUPR|Radiation: VMAT	Patient Reported Quality of life related to Radiation Induced Nausea and Vomiting (RINV)|Control of RINV Radiation Induced Nausea and Vomiting (RINV)|Patient Reported Pain Response|Patient Reported Use of Medications|Patient Reported Fatigue, Nausea, Vomiting|Patient Reported Quality of Life|Economic Analysis	British Columbia Cancer Agency	All	18 Years and older (Adult, Older Adult)	Not Applicable	250	Other	Interventional	Allocation: Randomized|Intervention Model: Parallel Assignment|Masking: None (Open Label)|Primary Purpose: Treatment	SUPR-3D	2019-12-02	2023-06-23	2023-06-28	2018-10-03		April 7, 2022	BC Cancer, Prince George, British Columbia, Canada|BC Cancer, Vancouver, British Columbia, Canada|BC Cancer - Victoria, Victoria, British Columbia, Canada|London Health Sciences Centre, London, Ontario, Canada|Princess Margaret Cancer Centre, Toronto, Ontario, Canada	"Informed Consent Form", https://ClinicalTrials.gov/ProvidedDocs/15/NCT03694015/ICF_002.pdf	https://ClinicalTrials.gov/show/NCT03694015
257	NCT00294437	ZOMETA® (Zoledronic Acid) for Prevention of Bone Metastases		Terminated	No Results Available	Prostate Cancer	Drug: Zometa	Time to occurrence of first bone metastasis, as assessed by bone scan and confirmed by additional radiological examination|To assess the effects of i.v. Zometa® (zoledronic acid) 4 mg, with respect to the following efficacy parameters as well as safety and tolerability:|Effects on pain and analgesic drug consumption, assessed by the composite pain score from BPI (Brief Pain Inventory) for pain an…	Central European Cooperative Oncology Group	Male	18 Years and older (Adult, Older Adult)	Phase 3	376	Other	Interventional	Allocation: Randomized|Intervention Model: Parallel Assignment|Masking: None (Open Label)|Primary Purpose: Treatment	CECOG/prostate 1.2.001	2023-12-03	2023-12-03	2023-11-07	2006-02-22		2012-05-01	LKH Leoben, Abt. für Innere Medizin, Leoben, Steiermark, Austria|Thermenkh Baden, Urologie, Baden bei Wien, Austria|LKH Graz Univ. Klinik f Urologie, Graz, Austria|LKH Innsbruck, Dept f. Urologie, Innsbruck, Austria|KH d Elisabethinen Linz, Dep of Urology, Linz, Austria|KH der Barmherzigen Schwestern, Dept Urologie, Linz, Austria|LKH Salzburg, Clinic f Radiotherapy a Radiooncology, Salzburg, Aust…		https://ClinicalTrials.gov/show/NCT00294437
258	NCT02964988	uPAR PET/CT in Radium-223-dichloride Treatment of Patients With Metastatic Castration-resistant Prostate Cancer		Terminated	No Results Available	Prostate Cancer Metastatic|Bone Metastases	Drug: Injection of PET tracer 68Ga-NOTA-AE105|Device: PET/CT	uPAR PET/CT imaging|Change in uPAR PET/CT after two cycles of Radium-223|uPAR PET/CT as prognostic factor for overall survival|uPAR PET/CT as prognostic factor for progression free survival	Rigshospitalet, Denmark	Male	18 Years and older (Adult, Older Adult)	Phase 2	17	Other	Interventional	Allocation: N/A|Intervention Model: Single Group Assignment|Masking: None (Open Label)|Primary Purpose: Diagnostic	AK-2016-PC-1|2016-002184-34	2023-01-17	2019-10-11	2019-10-11	2016-11-16		2019-10-15	Rigshospitalet, Copenhagen, Denmark		https://ClinicalTrials.gov/show/NCT02964988
259	NCT01062503	Duration of Suppression of Bone Turnover Following Treatment With Zoledronic Acid in Men With Metastatic CRPC	SubDueP	Completed	No Results Available	Metastatic Prostate Cancer|Bone Metastasis	Drug: Zoledronic acid	Patients given single dose of Zoledronic Acid 4mg IV|Brief Pain Inventory Location Questionnaire|FACT-BP Quality of Life Questionnaire|We will monitor for uNTX, sCTX, BAP (fasting morning sample)	University Health Network, Toronto	Male	18 Years and older (Adult, Older Adult)		48	Other	Observational	Observational Model: Case-Only|Time Perspective: Prospective	REB 09-0688-C|PRIT9	2023-01-10	2023-06-14	2023-06-14	2010-02-04		April 27, 2015	Princess Margaret Hospital, Toronto, Ontario, Canada		https://ClinicalTrials.gov/show/NCT01062503
260	NCT00172055	Study to Assess Efficacy and Safety of Zoledronic Acid and the Value of Markers of Bone Resorption in the Prediction of Bone Metastases and Cancer Treatment-induced Bone Loss (CTIBL) in Patients With Prostate Cancer on Hormone Therapy		Completed	No Results Available	Cancer Prostate	Drug: Zoledronic acid	If and to what extent rising levels of the bone resorption marker CTX can be used as an indicator for the development of bone metastases, diagnosed via bone scintigraphy.|If and to what extent rising levels of PSA can be used as an indicator for the development of bone metastases	Novartis Pharmaceuticals|Novartis	All	18 Years and older (Adult, Older Adult)	Phase 3	218	Industry	Interventional	Allocation: N/A|Intervention Model: Single Group Assignment|Masking: None (Open Label)|Primary Purpose: Treatment	CZOL446GBE03	2023-12-04	2023-07-09	2023-07-09	2005-09-15		2017-03-06	Novartis Investigative Site, Anderlecht, Belgium|Novartis Investigative Site, Antwerpen, Belgium|Novartis Investigative Site, Brugge, Belgium|Novartis Investigative Site, Bruxelles, Belgium|Novartis Investigative Site, Charleroi, Belgium|Novartis Investigative Site, Edegem, Belgium|Novartis Investigative Site, Gent, Belgium|Novaris Investigative Site, Gosselies, Belgium|Novartis Investigative Sit…		https://ClinicalTrials.gov/show/NCT00172055
261	NCT03223727	Treatment Outcomes in a Non-study Population of Symptomatic mCRPC Patients Treated With Radium-223	ROTOR	Active, not recruiting	No Results Available	Prostate Cancer Metastatic|Bone Metastases	Diagnostic Test: Blood tests	Efficacy of treatment on pain outcomes, as mentioned by the patient|Efficacy of treatment by patient records|Symptomatic Skeletal Event|Clinical Parameters assessed by the WHO PS.|Number of participants with treatment-related adverse events as assessed by CTCAE v4.0|Subsequent therapy after Radium-223: Number of participants with treatment-related adverse events as assessed by CTCAE v4.0|Biomarke…	The Netherlands Cancer Institute|Bayer	Male	18 Years and older (Adult, Older Adult)		100	Other|Industry	Observational	Observational Model: Cohort|Time Perspective: Prospective	m15RTO	2015-10-30	2022-02-03	2023-02-03	2017-07-21		April 21, 2022	The Netherlands Cancer Intitute, Amsterdam, Netherlands|Franciscus Gasthuis & Vlietland, Rotterdam, Netherlands		https://ClinicalTrials.gov/show/NCT03223727
262	NCT01996046	FDG PET/CT in Breast Cancer Bone Mets		Active, not recruiting	No Results Available	Estrogen Receptor Positive Breast Cancer|Bone Metastases	Other: FDG PET/CT scan	Progression free survival|Overall Survival	University of Pennsylvania	Female	18 Years and older (Adult, Older Adult)		75	Other	Observational	Observational Model: Case-Only|Time Perspective: Prospective	817940|UPCC17113	2023-09-13	2023-07-22	2023-07-22	2013-11-27		2021-08-06	University of Pennsylvania Hospital, Philadelphia, Pennsylvania, United States		https://ClinicalTrials.gov/show/NCT01996046
263	NCT03579212	Evaluation of the Performance of Y-STRUT® Medical Device to Strengthen Pre-fractural Tumour-induced Lesions at the Level of the Proximal Femur		Terminated	No Results Available	Pathological Fracture of Hip|Bone Metastases	Device: Y-STRUT® (Hyprevention, Pessac, France)	Frequency of post-operative fracture [Performance of the device]|Pain [Tolerance of the device]|Resumption of weight-bearing [Tolerance of the device]|Quality of life [Tolerance of the device]|Recording of adverse events and device effects [Safety of the device]|Surgical procedure duration [feasibility of the procedure]|Hospitalisation duration [feasibility of the procedure]|Rates of complication…	Hyprevention	All	18 Years and older (Adult, Older Adult)		16	Industry	Observational	Observational Model: Cohort|Time Perspective: Prospective	HIPPON100	2023-11-16	2021-02-28	2021-02-28	2018-07-06		April 14, 2021	CHU Caen, Caen, France|Hôpital européen Georges-Pompidou, Paris, France|Hopital Tenon - AP-HP, Paris, France|CHU Toulouse, Toulouse, France		https://ClinicalTrials.gov/show/NCT03579212
264	NCT00156884	A Trial of Strontium Cisplatin for the Palliation of Bone Pain Secondary to Hormone Refractory Prostate Cancer		Completed	No Results Available	Hormone Refractory Prostate Cancer|Bone Metastases	Drug: strontium-89|Drug: cisplatin	Palliative pain response|analgesic response	Alberta Health services|The Prostate Cancer Research Foundation of Canada|Amersham Health|AHS Cancer Control Alberta	Male	18 Years and older (Adult, Older Adult)	Phase 2	58	Other|Industry	Interventional	Allocation: Randomized|Intervention Model: Single Group Assignment|Masking: None (Open Label)|Primary Purpose: Treatment	GUPPS2	2023-08-03	2023-05-08	2023-05-08	2005-09-12		2012-01-19	Tom Baker Cancer Centre, Calgary, Alberta, Canada|BC Cancer Agency, Vancouver, British Columbia, Canada		https://ClinicalTrials.gov/show/NCT00156884
265	NCT01070485	BAY88-8223, Alpharadin, Breast Cancer Patients With Bone Dominant Disease		Completed	No Results Available	Breast Cancer|Bone Metastases	Drug: Radium-223 chloride (BAY88-8223)	Changes in bone markers (urine levels of NTX (uNTX) and bone-alkaline phosphatase (ALP)|All safety data, including adverse events, changes in laboratory variables, vitals signs, physical examination, late toxicity|Biochemical markers (additional bone markers and CA15.3)|Eastern Cooperative Oncology Group (ECOG) Performance Status (PS)|Pain	Bayer	Female	21 Years and older (Adult, Older Adult)	Phase 2	23	Industry	Interventional	Allocation: Non-Randomized|Intervention Model: Single Group Assignment|Masking: None (Open Label)|Primary Purpose: Treatment	15468|2009-012189-30|BC1-09	2023-01-10	2023-03-11	2023-01-12	2010-02-18		2014-06-25	Brussels, Belgium|Liège, Belgium|Oslo, Norway|Sheffield, United Kingdom		https://ClinicalTrials.gov/show/NCT01070485
266	NCT00060138	Monoclonal Antibody Compared With Zoledronate in Treating Women With Breast Cancer and Bone Metastases		Completed	No Results Available	Breast Cancer|Hypercalcemia of Malignancy|Metastatic Cancer|Pain	Biological: monoclonal antibody CAL|Drug: zoledronic acid		Chugai Pharmaceutical|National Cancer Institute (NCI)	Female	18 Years and older (Adult, Older Adult)	Phase 1|Phase 2		Industry|NIH	Interventional	Allocation: Randomized|Masking: Double|Primary Purpose: Supportive Care	CWRU-080235|CDR0000299530|CBI-1102|CBI-CAL-03	2023-11-02	2023-09-04		2003-05-07		2013-05-15	Ireland Cancer Center, Cleveland, Ohio, United States		https://ClinicalTrials.gov/show/NCT00060138
267	NCT00958477	A Study to Determine the Safety, Tolerability, Pharmacokinetics and Dynamic Effects of Different Doses of the Study Drug EMD 525797 in Prostate Cancer		Completed	Has Results	Prostate Cancer|Bone Metastases	Biological: EMD 525797	Number of Subjects With Dose Limiting Toxicity (DLT)|Number of Subjects With Treatment Emergent Adverse Events (TEAEs), Serious TEAEs and Related TEAEs|Observed Maximum Serum Concentration (Cmax) of EMD 525797 After First Infusion|Observed Maximum Serum Concentration (Cmax) of EMD 525797 After Third Infusion|Area Under the Serum Concentration-time Curve From Time Zero to the Last Sampling Time (A…	Merck KGaA, Darmstadt, Germany	Male	18 Years and older (Adult, Older Adult)	Phase 1	26	Industry	Interventional	Allocation: N/A|Intervention Model: Single Group Assignment|Masking: None (Open Label)|Primary Purpose: Treatment	EMR62242_002	2023-10-08	2023-09-10	2023-03-11	2009-08-13	2017-08-02	2017-08-02	Institut Jules Bordet - Medical Oncology Clinic, Brussels, Belgium|Universitätsklinikum Aachen, AÖR - Medizinische Fakultät der RWTH - Klinik für Urologie, Aachen, Germany|Universitätsklinikum "Carl Gustav Carus" Dresden - Klinik und Poliklinik für Urologie, Dresden, Germany|Klinikum Rechts der Isar - Urologische Klinik und Poliklinik, München, Germany		https://ClinicalTrials.gov/show/NCT00958477
268	NCT05115331	Palliative UNConventional Hypofractionation Trial for Metastatic Bone Disease	1-2 PUNCH	Recruiting	No Results Available	Metastatic Bone Tumor	Radiation: Experimental Radiation Dose|Radiation: Conventional Radiation Dose	Pain Response measured by the Brief Pain Inventory|Pain Response measured by the Bone Mets Pain scale|Safety through 30 days post-radiation|Time to pain relief|Quality of Life (EORTC QLQ-C30) at Baseline, 1, 3, and 6 months post treatment|Quality of Life (EORTC QLQBM22) at Baseline, 1, 3, and 6 months post treatment|Overall survival through 2 years post-treatment.|Retreatment rates through 2 year…	University of Cincinnati	All	18 Years and older (Adult, Older Adult)	Phase 3	168	Other	Interventional	Allocation: Randomized|Intervention Model: Parallel Assignment|Masking: None (Open Label)|Primary Purpose: Treatment	UCCC-RT-21-01	2021-11-24	2024-11-24	2025-11-24	2021-11-10		2021-11-26	University of Cincinnati, Cincinnati, Ohio, United States		https://ClinicalTrials.gov/show/NCT05115331
269	NCT00003162	Radiation Therapy in Treating Patients With Bone Metastases From Breast or Prostate Cancer		Completed	No Results Available	Breast Cancer|Metastatic Cancer|Pain|Prostate Cancer	Procedure: pain therapy|Radiation: radiation therapy		Radiation Therapy Oncology Group|National Cancer Institute (NCI)|North Central Cancer Treatment Group	All	18 Years and older (Adult, Older Adult)	Phase 3	949	Other|NIH	Interventional	Allocation: Randomized|Intervention Model: Parallel Assignment|Masking: None (Open Label)|Primary Purpose: Supportive Care	RTOG-9714|CDR0000065957|NCCTG-R9714|NCI-P97-0124	1998-02-01	2023-07-03		April 18, 2003		2015-11-17	University of Alabama at Birmingham Comprehensive Cancer Center, Birmingham, Alabama, United States|Huntsville Hospital System, Huntsville, Alabama, United States|Comprehensive Cancer Institute of Huntsville, Huntsville, Alabama, United States|MBCCOP - Gulf Coast, Mobile, Alabama, United States|Alabama Oncology, LLC, Montgomery, Alabama, United States|Radiation Oncology Associates of West Alabama…		https://ClinicalTrials.gov/show/NCT00003162
270	NCT02705183	Post-operative RadioTherapy for Patients With Metastases of the Long Bones	PORT	Unknown status	No Results Available	Metastasis to Bone	Radiation: Radiotherapy	The number of patients with a difference of 2 points or more on a 11-point numeric rating scale for pain|Complications	Leiden University Medical Center	All	18 Years and older (Adult, Older Adult)	Not Applicable	250	Other	Interventional	Allocation: Randomized|Intervention Model: Parallel Assignment|Masking: None (Open Label)|Primary Purpose: Treatment	NL54480.058.15	2023-01-16	2023-01-19	2023-01-19	2016-03-10		2016-09-19	Leiden University Medical Center, Leiden, Netherlands		https://ClinicalTrials.gov/show/NCT02705183
271	NCT00769990	Genistein in Treating Patients Undergoing External-Beam Radiation Therapy for Bone Metastases		Withdrawn	No Results Available	Breast Cancer|Kidney Cancer|Lung Cancer|Melanoma|Metastatic Cancer|Pain|Prostate Cancer	Dietary Supplement: genistein|Radiation: radiation therapy	Safety|Time to pain relief, duration of pain relief, and degree of pain relief|Incidence of pathologic fractures|Effect of treatment on quality of life measures as assessed by the BPI and FACT-G	Masonic Cancer Center, University of Minnesota	All	18 Years and older (Adult, Older Adult)	Phase 1|Phase 2	0	Other	Interventional	Allocation: N/A|Intervention Model: Single Group Assignment|Masking: None (Open Label)|Primary Purpose: Treatment	2008LS035|UMN-0803M29541	2023-09-08	2023-11-09	April 2010	2008-10-09		2017-12-13			https://ClinicalTrials.gov/show/NCT00769990
272	NCT05058014	Skeletal Metastasis Registry		Recruiting	No Results Available	Metastatic Bone Tumor		Overall survival (OS)|Reoperation or retreatment for any reason|Time to reoperation or retreatment for any reason	Sidney Kimmel Comprehensive Cancer Center at Johns Hopkins|Murtha Cancer Center|Defense Health Programs with the U.S. Army Medical Research and Materiel Command	All	22 Years and older (Adult, Older Adult)		200	Other	Observational	Observational Model: Case-Only|Time Perspective: Prospective	SIB1802|IRB00157231	2018-08-16	2023-08-16	2025-08-16	2021-09-27		2022-09-27	Sibley Memorial Hospital, Washington, District of Columbia, United States		https://ClinicalTrials.gov/show/NCT05058014
273	NCT01599793	Magnetic Resonance Imaging in Measuring the Effect of Cabozantinib in Patients With Castrate Resistant Prostate Cancer		Completed	Has Results	Bone Metastases|Castrate-resistant Prostate Cancer|Recurrent Prostate Cancer|Stage IV Prostate Cancer	Drug: cabozantinib|Other: laboratory biomarker analysis|Procedure: magnetic resonance imaging	Change in the Functional MRI Metrics Ktrans Between 2 Weeks and Baseline|Association of Progression Free Survival (PFS) With Ktrans and ADC|Changes in Bone Scan Response|Correlation of Percent Change in the Functional MRI Metrics to RECIST Tumor Measurements|Change of PSA Between 12 Weeks and Baseline|Correlation of Percent Change in the Functional MRI Metrics With CTC|Change in Pain Scale Betwee…	University of Chicago|NorthShore University HealthSystem	Male	Child, Adult, Older Adult	Phase 2	19	Other	Interventional	Allocation: N/A|Intervention Model: Single Group Assignment|Masking: None (Open Label)|Primary Purpose: Diagnostic	12-1031|NCI-2012-00677	2023-05-12	2023-12-17	2023-12-18	2012-05-16	2020-03-26	2020-03-26	University of Chicago, Chicago, Illinois, United States	"Study Protocol and Statistical Analysis Plan", https://ClinicalTrials.gov/ProvidedDocs/93/NCT01599793/Prot_SAP_000.pdf	https://ClinicalTrials.gov/show/NCT01599793
274	NCT03458559	Rhenium-188-HEDP vs. Radium-223-chloride in Patients With Advanced Prostate Cancer Refractory to Hormonal Therapy	RaRe	Active, not recruiting	No Results Available	Prostate Cancer Metastatic to Bone	Drug: Radium-223 chloride|Drug: Rhenium-188-HEDP	Overall survival|Time to PSA progression|Time to total-ALP progression|Clinical progression|Time to first SRE|Quality of life|Effect on pain|Incremental Cost Effectiveness Ratio (IVER)	Amsterdam UMC, location VUmc	Male	18 Years and older (Adult, Older Adult)	Phase 3	402	Other	Interventional	Allocation: Randomized|Intervention Model: Parallel Assignment|Masking: None (Open Label)|Primary Purpose: Treatment	2017.61	2018-05-16	2022-05-16	2024-05-16	2018-03-08		2020-11-17	VU University Medical Center, Amsterdam, Netherlands		https://ClinicalTrials.gov/show/NCT03458559
275	NCT05110430	Automated Detection of Metastatic Bone Disease on Bone Scintigraphy Scans		Active, not recruiting	No Results Available	Metastatic Bone Tumor	Other: Deep learning based detection of metastatic bone disease on bone scintigraphy scans.	The classification performance of DL algorithm compared to the ground truth|Comparing the classification performance of the DL algorithm to that of physicians	Maastricht University|Aalborg University Hospital|Centre Hospitalier Universitaire de Liege|University Hospital, Aachen|University of Namur	All	Child, Adult, Older Adult		2000	Other	Observational	Observational Model: Cohort|Time Perspective: Retrospective	MBDDL	2021-03-10	2021-12-30	2021-12-31	2021-11-08		2021-11-08	Maastricht University, Maastricht, Limburg, Netherlands		https://ClinicalTrials.gov/show/NCT05110430
276	NCT05427825	ERAS Anesthetic Care for Metastatic Spine Cancer Resection		Recruiting	No Results Available	Metastatic Bone Tumor	Other: ERAS anesthetic care|Other: Standard anesthetic care	Postoperative quality of recovery-15 score (QoR-15)|Delirium incidence|Pain intensity	National Taiwan University Hospital	All	20 Years and older (Adult, Older Adult)	Not Applicable	120	Other	Interventional	Allocation: Randomized|Intervention Model: Factorial Assignment|Masking: Triple (Participant, Investigator, Outcomes Assessor)|Primary Purpose: Treatment	202203092MINA	2023-07-22	2023-12-23	2023-01-24	2022-06-22		2022-06-28	National Taiwan University Hospital, Taipei, Taiwan		https://ClinicalTrials.gov/show/NCT05427825
277	NCT00104650	Study of AMG 162 in Subjects With Advanced Cancer Currently Being Treated With Intravenous (IV) Bisphosphonates		Completed	Has Results	Bone Metastases in Men With Hormone-Refractory Prostate Cancer|Bone Metastases in Subjects With Advanced Breast Cancer|Bone Metastases in Subjects With Advanced Cancer or Multiple Myeloma	Genetic: AMG 162 180 mg (SC) q 12 weeks|Drug: IV Bisphosphonate q 4 weeks|Genetic: AMG 162- 180 mg q 4 weeks	uNTx (Corrected by Creatinine) < 50 Nmol/mmol at Week 13|uNTx (Corrected by Creatinine) < 50 Nmol/mmol at Week 25|Percent Change of uNTx (Corrected by Creatinne) From Baseline to Week 25|Time to Reduction of uNTX (Corrected by Creatinine) to <50nmol/mmol|Duration of Maintaining uNTX (Corrected by Creatinine) < 50nmol/mmol|Percent Change of Serum CTX From Baseline to Week 25|Time to First Skeletal…	Amgen	All	18 Years and older (Adult, Older Adult)	Phase 2	111	Industry	Interventional	Allocation: Randomized|Intervention Model: Parallel Assignment|Masking: None (Open Label)|Primary Purpose: Treatment	20040114	2023-01-05	2023-01-08	2023-03-10	2005-03-04	2011-01-07	2011-01-24			https://ClinicalTrials.gov/show/NCT00104650
278	NCT03304418	Radium-223 and Radiotherapy in Hormone-Naïve Men With Oligometastatic Prostate Cancer to Bone	RROPE	Active, not recruiting	No Results Available	Prostate Cancer Metastatic to Bone	Drug: Radium Ra 223 Dichloride|Radiation: Radiation	Time to Androgen Deprivation Therapy (ADT) Use|Time from start of study therapy to start of ADT.|Evaluate health related quality of life (QOL)|Evaluate changes in general function and well being|Evaluate time to first skeletal related event (SRE)|Evaluate the PSA doubling time|Evaluate Overall Surival	University of Utah|Bayer	Male	18 Years and older (Adult, Older Adult)	Phase 2	20	Other|Industry	Interventional	Allocation: N/A|Intervention Model: Single Group Assignment|Masking: None (Open Label)|Primary Purpose: Treatment	HCI102312	2018-02-27	2023-11-22	2023-08-23	2017-10-09		2021-09-22	Huntsman Cancer Institute, Salt Lake City, Utah, United States		https://ClinicalTrials.gov/show/NCT03304418
279	NCT00554918	Docetaxel and Prednisolone With or Without Zoledronic Acid and/or Strontium Chloride Sr 89 in Treating Patients With Prostate Cancer Metastatic to Bone That Has Not Responded to Hormone Therapy		Completed	No Results Available	Metastatic Cancer|Prostate Cancer	Drug: docetaxel|Drug: prednisolone|Drug: zoledronic acid|Procedure: quality-of-life assessment|Radiation: strontium chloride Sr 89	Safety|Toxicity and tolerability of docetaxel and zoledronic acid|Toxicity and tolerability of docetaxel and strontium chloride Sr 89|Toxicity and tolerability of docetaxel, zoledronic acid, and strontium chloride Sr 89|Health Care economic analysis|Changes in bone mineral density|Median time to disease progression|Pain progression-free survival (PFS)|PSA PFS|Pain response|Overall survival|Qualit…	University Hospital Birmingham|National Cancer Institute (NCI)	Male	18 Years and older (Adult, Older Adult)	Phase 2	300	Other	Interventional	Allocation: Randomized|Primary Purpose: Treatment	CRUK-TRAPEZE-2100|CDR0000574585|EUDRACT-2004-002295-41|EU-20782|ISRCTN12808747|SANOFI-AVENTIS-CRUK-TRAPEZE-21|NOVARTIS-CRUK-TRAPEZE-2100	2023-02-05	2023-12-08	2023-06-13	2007-11-07		2013-08-07	Queen Elizabeth Hospital at University Hospital of Birmingham NHS Trust, Birmingham, England, United Kingdom|Gloucestershire Oncology Centre at Cheltenham General Hospital, Cheltenham, England, United Kingdom|Gloucestershire Royal Hospital, Gloucester, England, United Kingdom|Ipswich Hospital, Ipswich, England, United Kingdom|Mid Kent Oncology Centre at Maidstone Hospital, Maidstone, England, Uni…		https://ClinicalTrials.gov/show/NCT00554918
280	NCT00181558	Atrasentan and Zometa for Men With Prostate Cancer Metastatic to Bone		Completed	No Results Available	Prostate Cancer|Adenocarcinoma of the Prostate	Drug: Atrasentan|Drug: Zoledronic Acid (Zometa)	To compare the effects of Atrasentan monotherapy with combination therapy using Atrasentan and Zometa on bone specific alkaline phosphatase.|To evaluate the effects of Atrasentan monotherapy and combination therapy with Atrasentan and Zometa on PSA doubling time.	Massachusetts General Hospital|Dana-Farber Cancer Institute|Brigham and Women's Hospital|Abbott	Male	18 Years and older (Adult, Older Adult)	Phase 2	44	Other|Industry	Interventional	Allocation: Randomized|Intervention Model: Parallel Assignment|Masking: None (Open Label)|Primary Purpose: Treatment	01-200	2023-12-01	2023-12-06	2023-12-06	2005-09-16		2010-05-10	Massachusetts General Hospital, Boston, Massachusetts, United States|Dana-Farber Cancer Institute, Boston, Massachusetts, United States		https://ClinicalTrials.gov/show/NCT00181558
281	NCT00029029	Radiofrequency Ablation in Relieving Pain in Patients With Bones Metastases		Completed	No Results Available	Metastatic Cancer|Pain	Procedure: pain therapy|Procedure: radiofrequency ablation		Mayo Clinic	All	18 Years to 120 Years (Adult, Older Adult)	Phase 2		Other	Interventional	Primary Purpose: Supportive Care	CDR0000069180|RITA-201-00|MAYO-IRB-O-1223-00|MDA-ID-01534|RITA-IDE-G000177	2000-10-13	2002-10-24	2002-10-24	2003-01-27		2020-08-12	Northwestern Memorial Hospital, Chicago, Illinois, United States|Sidney Kimmel Comprehensive Cancer Center at Johns Hopkins, Baltimore, Maryland, United States|Massachusetts General Hospital Cancer Center, Boston, Massachusetts, United States|Mayo Clinic Cancer Center, Rochester, Minnesota, United States|University of Texas - MD Anderson Cancer Center, Houston, Texas, United States|St. Luke's Med…		https://ClinicalTrials.gov/show/NCT00029029
282	NCT00685646	Androgen Blockade Therapy With or Without Zoledronic Acid in Treating Patients With Prostate Cancer and Bone Metastases	ZAPCA	Completed	No Results Available	Metastatic Cancer|Prostate Cancer	Drug: antiandrogen therapy|Drug: zoledronic acid	Time to treatment failure (TTF)|Time to first skeletal-related events (SRE)|Overall survival|Extent of disease on bone scan (EOD)|Pain scale|FACES pain-rating scale|Adverse events|QOL (SF-36)	Translational Research Center for Medical Innovation, Kobe, Hyogo, Japan|Kyoto University, Graduate School of Medicine	Male	20 Years and older (Adult, Older Adult)	Phase 3	227	Other	Interventional	Allocation: Randomized|Intervention Model: Parallel Assignment|Masking: None (Open Label)|Primary Purpose: Treatment	TRIGU0705|KYUH-TRIGU0705	2023-05-08	2023-01-14	2023-01-14	2008-05-28		2015-10-16	Kyoto University Hospital, Kyoto, Japan		https://ClinicalTrials.gov/show/NCT00685646
283	NCT03368989	The Effects of Radium-223 Dichloride Therapy on Radionuclide Bone Scan Lesions.		Completed	No Results Available	Bony Metastases From Castrate Refractory Prostate Cancer	Drug: Radium-223 dichloride	Change in number of osteoblastic bone lesions|functional status as indicated by score on the Eastern Cooperative Oncology Group (ECOG) performance scale|pain level as assessed by numeric rating score|(PSA) prostate specific antigen level|(ALP) alkaline phosphatase level|Hemoglobin level|Platelet level|Neutrophil count|Creatinine level|white blood cell count	The University of Texas Health Science Center, Houston	Male	18 Years and older (Adult, Older Adult)		21	Other	Observational	Observational Model: Cohort|Time Perspective: Prospective	HSC-MS-14-0113	2014-02-11	2017-02-07	2017-02-07	2017-12-11		2019-06-11	The University of Texas Health Science Center at Houston, Houston, Texas, United States		https://ClinicalTrials.gov/show/NCT03368989
284	NCT00002503	Strontium Compared With Radiation Therapy in Treating Patients With Hormone-Refractory Prostate Cancer With Painful Bone Metastases		Completed	No Results Available	Metastatic Cancer|Prostate Cancer	Radiation: strontium chloride Sr 89		European Organisation for Research and Treatment of Cancer - EORTC	Male	Child, Adult, Older Adult	Phase 3	204	Other	Interventional	Primary Purpose: Treatment	EORTC-30921	1992-10-01	2000-11-01		2004-05-20		2012-09-24	Cliniques Universitaires Saint-Luc, Brussels, Belgium|Universitair Ziekenhuis Antwerpen, Edegem, Belgium|Universitair Ziekenhuis Gent, Ghent, Belgium|U.Z. Gasthuisberg, Leuven, Belgium|Aarhus Kommunehospital, Aarhus, Denmark|Rigshospitalet, Copenhagen, Denmark|Ospedale B. Ramazzini, Carpi, Italy|Universita Degli Studi di Firenze - Policlin. di Careggi, Florence, Italy|Instituto Scientifico H.S. R…		https://ClinicalTrials.gov/show/NCT00002503
285	NCT01428219	Trial of Cabozantinib (XL184) in Castrate-Resistant Prostate Cancer Metastatic to Bone		Terminated	Has Results	Prostate Cancer Metastatic	Drug: Cabozantinib	Percentage of Participants Who Remain Progression-free at 12 Weeks|Incidence of Adverse Events (AEs) Related to Treatment|Mean Fold Change in Bone Metabolism Biomarker Expression With Cabozantinib|Progression-free Survival|Response Proportion in Both Soft Tissue and Bone Disease.|Duration of Response.|The Number of Patients That Are Progression Free by PSA|Median Time to PSA Progression	University of Michigan Rogel Cancer Center|Exelixis	Male	18 Years and older (Adult, Older Adult)	Phase 2	25	Other|Industry	Interventional	Allocation: N/A|Intervention Model: Single Group Assignment|Masking: None (Open Label)|Primary Purpose: Treatment	UMCC 2011.069|HUM00052320	2023-02-12	2023-10-14	2023-09-15	2011-09-02	2016-05-02	2017-12-12	University of Michigan, Ann Arbor, Michigan, United States		https://ClinicalTrials.gov/show/NCT01428219
286	NCT03958565	Response of Bony Metastasis to Tyrosine Kinase Inhibitors in Non-Small Cell Lung Cancers With Actionable Driver Mutations.		Recruiting	No Results Available	Carcinoma, Non-Small-Cell Lung	Biological: Tyrosine Kinase Inhibitor|Drug: Zoledronic Acid 4 MG/100 ML Intravenous Solution [ZOMETA]|Drug: Denosumab 120 MG/1.7 ML Subcutaneous Solution [XGEVA]	Percentage reduction of urine NTX and serum CTX|Skeletal-related events (SREs)|Progression Free Survival (PFS)|Objective Response Rate (ORR)|Percentage reduction in the bone turnover markers including urine N-telopeptide (NTX) and serum C-terminal telopeptide (CTX)|Percentage normalization of blood total alkaline phosphatase	University of Colorado, Denver	All	18 Years to 100 Years (Adult, Older Adult)		100	Other	Observational	Observational Model: Other|Time Perspective: Prospective	19-0392.cc	April 15, 2019	2023-03-05	2023-03-05	2019-05-22		2022-05-13	University of Colorado Hospital, Aurora, Colorado, United States		https://ClinicalTrials.gov/show/NCT03958565
287	NCT00582920	Investigation of Changes in Bone Scan Imaging Before and After Intravenous Bisphosphonate Therapy for Osseous Metastases From Breast Cancer		Completed	No Results Available	Osseous Lesions From Metastatic Breast Cancer	Radiation: Zometa?	Evaluate whether routine clinical use of intravenous zoledronic acid therapy affects technetium methylidene diphosphonate (Tc-99 MDP) uptake in bone metastases.	Memorial Sloan Kettering Cancer Center	Female	18 Years to 110 Years (Adult, Older Adult)	Phase 1	10	Other	Interventional	Allocation: Non-Randomized|Intervention Model: Single Group Assignment|Masking: Single (Outcomes Assessor)|Primary Purpose: Diagnostic	05-133	2023-01-06	2023-10-08	2023-10-08	2007-12-28		2015-12-24	Memorial Sloan-Kettering Cancer Center, New York, New York, United States		https://ClinicalTrials.gov/show/NCT00582920
288	NCT01760941	Compassionate Same-Day Evaluation & Delivery of XRT for Bony Metastasis in Hospice Patients		Terminated	Has Results	Symptomatic Osseous Bone Lesions From Any Malignancy	Radiation: Radiation Therapy|Other: Quality-of-Life Assessment|Other: Survey Administration	Feasibility of Treatment Delivery in the Same Day as Initial Evaluation|Evaluate the Treatment Influence on the Rate of Pain Stabilization and/or Reduction|Evaluate the Treatment Influence on Patient Quality of Life	Virginia Commonwealth University	All	18 Years and older (Adult, Older Adult)	Not Applicable	1	Other	Interventional	Allocation: N/A|Intervention Model: Single Group Assignment|Masking: None (Open Label)|Primary Purpose: Supportive Care	MCC-14596|NCI-2012-03117	2023-03-13	2023-01-15	2023-06-15	2013-01-04	2016-02-29	2016-02-29	Virginia Commonwealth University/Massey Cancer Center, Richmond, Virginia, United States		https://ClinicalTrials.gov/show/NCT01760941
289	NCT00608855	Percutaneous Cryoablation in Treating Patients With Painful Bone Metastases		Completed	No Results Available	Metastatic Cancer|Pain|Unspecified Adult Solid Tumor, Protocol Specific	Other: questionnaire administration|Procedure: cryosurgery|Procedure: pain therapy|Procedure: quality-of-life assessment	Average difference in pre- and post-treatment worst pain score in a 24-hour period at week 8|Average difference in pre- and post-treatment worst pain score in a 24-hour period, average pain score, and pain relief score at 6, 12, and 24 months|Average amount of pain per patient over the observation period as represented by the area under the curve (AUC) constructed from weekly pain scores on a vis…	Mayo Clinic|National Cancer Institute (NCI)	All	18 Years to 120 Years (Adult, Older Adult)	Not Applicable	60	Other|NIH	Interventional	Masking: None (Open Label)|Primary Purpose: Treatment	MC03C3|MAYO-MC03C3	2023-11-03	2023-02-13	2023-02-13	2008-02-06		2017-01-12	Mayo Clinic - Jacksonville, Jacksonville, Florida, United States|University of Michigan Comprehensive Cancer Center, Ann Arbor, Michigan, United States|Barbara Ann Karmanos Cancer Institute, Detroit, Michigan, United States|Mayo Clinic Cancer Center, Rochester, Minnesota, United States|NYU Cancer Institute at New York University Medical Center, New York, New York, United States|Memorial Sloan-Ket…		https://ClinicalTrials.gov/show/NCT00608855
290	NCT02715856	Telemonitoring After Surgery to Preserve Limb Function in Optimizing Mobility in Cancer Survivors With Skeletal Metastases		Completed	No Results Available	Bone Metastases|Cancer Survivor|Metastatic Malignant Neoplasm in the Bone	Other: Monitoring Device|Other: Physical Activity Measurement|Other: Quality-of-Life Assessment|Other: Questionnaire Administration|Procedure: Standard Follow-Up Care|Other: Survey Administration	Inter-Rater Agreement on the Physician Assessed Score|Completion of Follow-Up Assessments	M.D. Anderson Cancer Center|National Cancer Institute (NCI)	All	18 Years and older (Adult, Older Adult)	Not Applicable	72	Other|NIH	Interventional	Allocation: Randomized|Intervention Model: Parallel Assignment|Masking: None (Open Label)|Primary Purpose: Health Services Research	2015-0966|NCI-2016-00544|2015-00051255-Y1	April 13, 2016	2021-09-28	2021-09-28	2016-03-22		2021-10-12	M D Anderson Cancer Center, Houston, Texas, United States		https://ClinicalTrials.gov/show/NCT02715856
291	NCT03111914	Applications of Dual Energy CT in Patients With Osseous Metastases From Castrate-resistant Prostate Cancer		Terminated	No Results Available	Dual Energy CT (DECT)|Prostate Cancer	Diagnostic Test: Dual Energy Computed Tomography	Optimal threshold for iodine uptake to differentiate between therapy response and progression of metastatic bone disease|sensitivity of optimal threshold for iodine uptake to differentiate between therapy response and progression of metastatic bone disease|Specificity of optimal threshold for iodine uptake to differentiate between therapy response and progression of metastatic bone disease|Accura…	Duke University|Siemens Medical Solutions	Male	18 Years and older (Adult, Older Adult)	Not Applicable	7	Other|Industry	Interventional	Allocation: N/A|Intervention Model: Single Group Assignment|Masking: None (Open Label)|Primary Purpose: Diagnostic	Pro00078046	2017-07-03	2017-10-09	2017-10-09	April 13, 2017		2022-01-31	Duke University Hospital, Durham, North Carolina, United States		https://ClinicalTrials.gov/show/NCT03111914
292	NCT00918645	Calcium-41 (41Ca) Chloride Aqueous Solution in Diagnosing Patients With Prostate Cancer and Bone Metastasis	UCDCC#217	Terminated	Has Results	Metastatic Cancer|Prostate Cancer	Drug: 41 Ca	Number of Patients Whose Samples Were Measured for Pharmacokinetics|Number of Patients With Urinary 41Ca Clearance Correlated to Disease Progression|Number of Patients With Correlation Between 41Ca Clearance and Disease Stage	University of California, Davis|National Cancer Institute (NCI)	Male	18 Years and older (Adult, Older Adult)	Not Applicable	13	Other|NIH	Interventional	Allocation: N/A|Intervention Model: Single Group Assignment|Masking: None (Open Label)|Primary Purpose: Diagnostic	CDR0000628784|R21CA127671|P30CA093373|UCDCC-217	2023-09-09	2023-01-13	2023-06-13	2009-06-11	2017-12-22	2017-12-22	Lawrence Livermore National Laboratory, Livermore, California, United States		https://ClinicalTrials.gov/show/NCT00918645
293	NCT03795207	Prostate Cancer With OligometaSTatic Relapse: Combining Stereotactic Ablative Radiotherapy and Durvalumab (MEDI4736)	POSTCARD	Recruiting	No Results Available	Node; Prostate|Bone Metastases|Prostate Cancer Patients	Combination Product: SBRT Durvalumab|Radiation: SBRT	Two-years Progression-free survival|Health-related quality of life|Androgen deprivation therapy free survival|Prostate cancer specific survival|Overall survival|Acute toxicity: Common toxicity criteria version 4.03|Late toxicity: Common toxicity criteria version 4.03|Time to resistance castration	Institut Cancerologie de l'Ouest|AstraZeneca	Male	18 Years and older (Adult, Older Adult)	Phase 2	96	Other|Industry	Interventional	Allocation: Randomized|Intervention Model: Parallel Assignment|Masking: None (Open Label)|Primary Purpose: Treatment	ICO-N-2017-08	2019-03-21	2023-11-21	2024-11-21	2019-01-07		2021-09-16	Institut Bergonie, Bordeaux, France|CHRU de Brest, Brest, France|Centre Georges François Leclerc, Dijon, France|Centre Oscar Lambret, Lille, France|Chbs Lorient, Lorient, France|Centre Léon Bérard, Lyon, France|Institut de Cancérologie de Montpellier, Montpellier, France|Hospices Civils de Lyon, Pierre-Bénite, France|ICO, Saint-Herblain, France|Institut de Cancérologie de Loire, Saint-Priest-en-J…		https://ClinicalTrials.gov/show/NCT03795207
294	NCT02051218	Prevention of Symptomatic Skeletal Events With Denosumab Administered Every 4 Weeks Versus Every 12 Weeks		Recruiting	No Results Available	Metastatic Breast Cancer|Metastatic Prostate Cancer|Bone Metastases	Drug: Denosumab (reduced dosing)|Drug: Denosumab (standard dosing)	Time to first on-trial symptomatic skeletal event (SSE; Clinically significant pathological fracture, radiation therapy to bone, surgery to bone or spinal cord compression).|Toxicity (focus on hypocalcaemia and osteonecrosis of the jaw)|Time to first and subsequent on-trial SSE|Quality of Life measured by FACT-G and FACT-BP|Skeletal morbidity period rate (SMPR)|Skeletal morbidity rate (SMR)|Healt…	Swiss Group for Clinical Cancer Research	All	18 Years and older (Adult, Older Adult)	Phase 3	1380	Other	Interventional	Allocation: Randomized|Intervention Model: Parallel Assignment|Masking: None (Open Label)|Primary Purpose: Supportive Care	SAKK 96/12|000000685|2014-001189-87	2014-07-16	2023-12-22	2023-12-22	2014-01-31		2022-08-22	Landeskrankenhaus Feldkirch, Feldkirch, Austria|Klinikum Wels-Grieskrichen GmbH, Wels, Austria|Uniklinik Düsseldorf, Urologische Klinik, Düsseldorf, Germany|Universitätsklinikum Düsseldorf, Frauenheilkunde/Geburtshilfe, Düsseldorf, Germany|Universitätsmedizin Göttingen, Göttingen, Germany|Universitätsklinikum Schleswig-Holstein, Lübeck, Germany|Universitäts-Frauenklinik Ulm, Ulm, Germany|Hirsland…		https://ClinicalTrials.gov/show/NCT02051218
295	NCT00081159	Hormone Ablation Therapy, Doxorubicin, and Zoledronate With or Without Strontium 89 in Treating Patients With Androgen-Dependent Prostate Cancer and Bone Metastases		Completed	Has Results	Metastatic Cancer|Prostate Cancer	Drug: Doxorubicin hydrochloride|Drug: Goserelin acetate|Drug: Leuprolide acetate|Drug: Zoledronic acid|Procedure: orchiectomy|Radiation: strontium chloride Sr	Progression Free Survival (PFS)|Major Bone Scan Response	M.D. Anderson Cancer Center|National Cancer Institute (NCI)	Male	Child, Adult, Older Adult	Phase 2	80	Other|NIH	Interventional	Allocation: Randomized|Intervention Model: Parallel Assignment|Masking: None (Open Label)|Primary Purpose: Treatment	2003-0922|MDA-2003-0922|NCI-6459|NCI-2009-00062|CDR0000360625|2U10CA045809-17	2023-07-04	2023-09-14	2023-09-14	April 8, 2004	2016-11-10	2016-11-10	M.D. Anderson Cancer Center at Orlando, Orlando, Florida, United States|CCOP - Wichita, Wichita, Kansas, United States|M.D. Anderson Cancer Center at University of Texas, Houston, Texas, United States|CCOP - Marshfield Clinic Research Foundation, Marshfield, Wisconsin, United States		https://ClinicalTrials.gov/show/NCT00081159
296	NCT04635137	Ablation and Cementoplasty for Painful Bone Lesions		Not yet recruiting	No Results Available	Bone Lesion|Bone Metastases|Spine Metastases	Procedure: Ablation and Cementoplasty	Pain Scale|Quality of Life Questionnaire|Analgesia|Disease Burden	University of Calgary	All	18 Years and older (Adult, Older Adult)	Not Applicable	50	Other	Interventional	Allocation: N/A|Intervention Model: Single Group Assignment|Masking: None (Open Label)|Primary Purpose: Treatment	REB20-1593	2023-06-21	2023-12-22	2023-03-23	2020-11-18		April 30, 2021	Foothills Medical Centre, Calgary, Alberta, Canada|South Health Campus, Calgary, Alberta, Canada		https://ClinicalTrials.gov/show/NCT04635137
297	NCT04940754	Ankle Arthrodesis Nail for 2-level Pathologic Tibial Fracture		Active, not recruiting	No Results Available	Bone Metastases|Fracture Nonunion|Bone Lesion	Procedure: osteosynthesis	Weight bearing tolerance	Orthopaedie Zentrum Zuerich	Female	80 Years to 90 Years (Older Adult)	Not Applicable	1	Other	Interventional	Allocation: N/A|Intervention Model: Single Group Assignment|Masking: None (Open Label)|Primary Purpose: Treatment	GUE	April 8, 2021	April 8, 2022	2022-05-08	2021-06-28		2021-08-17	Orthopaedie Zentrum Zuerich, Zürich, Switzerland		https://ClinicalTrials.gov/show/NCT04940754
298	NCT03908853	Pain Phenotyping of Patients With Bone Cancer Pain	BonemetPAIN	Recruiting	No Results Available	Pain|Bone Metastases|Metastatic Breast Cancer		Conditioned pain modulation (CPM) determined by cuff pressure algometry|Sensory mapping with thermorollers and brush|Mechanical pain threshold with PinPrick.|Wind up ratio with Pin Prick|Cuff pressure pain threshold and pressure pain tolerance determined by cuff pressure algometry|Temporal summation of pressure pain|Questionnaire - The Short Form Brief Pain Inventory|Questionnaire - PainDETECT|Qu…	University of Copenhagen|The Novo Nordic Foundation	Female	18 Years and older (Adult, Older Adult)		70	Other	Observational	Observational Model: Cohort|Time Perspective: Cross-Sectional	H-18041465	2019-02-05	2022-02-01	2023-02-01	April 9, 2019		2021-03-02	Department of Oncology, Rigshospitalet, Copenhagen, Denmark|The Department of Oncology, Herlev Hospital, Herlev, Denmark		https://ClinicalTrials.gov/show/NCT03908853
299	NCT03554135	Single frActIoN eighT Gray Palliative Radiotherapy With Modulated Intensity for Pain Reduction	SAINT	Unknown status	No Results Available	Bone Metastases|Radiotherapy|Technology	Other: Personalization of palliative radiotherapy	Pain control|Re-treatment during follow up|Pain-dipendent variables	Fondazione Policlinico Universitario Agostino Gemelli IRCCS	All	18 Years and older (Adult, Older Adult)		50	Other	Observational	Observational Model: Cohort|Time Perspective: Prospective	0011201/18	2018-12-01	2018-12-31	2019-07-31	2018-06-12		2018-08-29			https://ClinicalTrials.gov/show/NCT03554135
300	NCT00634582	Paricalcitol in Treating Patients With Advanced Prostate Cancer and Bone Metastases		Terminated	Has Results	Metastatic Cancer|Prostate Cancer	Drug: paricalcitol|Other: immunoenzyme technique|Other: laboratory biomarker analysis|Procedure: dual x-ray absorptometry|Procedure: quality-of-life assessment	Biochemical Markers (i.e., Serum Parathyroid Hormone [PTH], Bone-specific Alkaline Phosphatase, and Osteocalcin) That Are Surrogates for Fracture Risk and Are Associated With Increased Bone Pain, Morbidity, and Mortality From Prostate Cancer	Wake Forest University Health Sciences|National Cancer Institute (NCI)	Male	18 Years to 120 Years (Adult, Older Adult)	Phase 2	2	Other|NIH	Interventional	Allocation: Non-Randomized|Intervention Model: Single Group Assignment|Masking: None (Open Label)|Primary Purpose: Treatment	IRB00004564|P30CA012197|CCCWFU-85107	2023-01-09	2023-01-13	2023-06-15	2008-03-13	2014-01-10	2018-07-06	Wake Forest University Comprehensive Cancer Center, Winston-Salem, North Carolina, United States		https://ClinicalTrials.gov/show/NCT00634582
301	NCT03249584	OsteoCool Tumor Ablation Post-Market Study	OPuS One	Completed	Has Results	Metastasis Spine|Metastasis to Bone	Device: OsteoCool? RF Ablation	Change of Worst Pain Score: Thoracic/Lumbar Spine RF Ablation|Change in Worst Pain Score: Periacetabulum, Iliac Crest, and/or Sacrum RF Ablation	MedtronicNeuro	All	18 Years and older (Adult, Older Adult)	Not Applicable	218	Industry	Interventional	Allocation: N/A|Intervention Model: Single Group Assignment|Masking: None (Open Label)|Primary Purpose: Treatment	MDT16075	2017-10-12	April 30, 2019	2020-07-17	2017-08-15	2020-07-07	2021-10-01	Banner - University Medical Center Phoenix, Phoenix, Arizona, United States|Saint Jude Medical Center, Fullerton, California, United States|Moffitt Cancer Center, Tampa, Florida, United States|Emory University School of Medicine, Atlanta, Georgia, United States|Northside Hospital, Cumming, Georgia, United States|University of Massachusetts Memorial Medical Center, Worcester, Massachusetts, United…	"Study Protocol and Statistical Analysis Plan", https://ClinicalTrials.gov/ProvidedDocs/84/NCT03249584/Prot_SAP_000.pdf	https://ClinicalTrials.gov/show/NCT03249584
302	NCT04516707	Evaluation of Tolerance and Efficacy Retrospective Data of XOFIGO	XOFIGO	Completed	No Results Available	Prostate Cancer|Bone Metastases|Hormone-resistant Prostate Cancer	Other: clinical database	Assess the epidemiological characteristics of the treated patient population|Assess the presence of adverse events resulting from short-term and medium-term XOFIGO treatment|Assess the number of patients who were able to benefit from the complete treatment (6 cycles)|Collect the causes of premature discontinuation of treatment|assess the antalgic effet of treatment (number of antalgic taken and h…	Institut du Cancer de Montpellier - Val d'Aurelle	All	18 Years and older (Adult, Older Adult)		67	Other	Observational	Observational Model: Other|Time Perspective: Retrospective	ICM-URC 2015/75	2016-01-01	2017-01-01	2018-05-01	2020-08-18		2020-08-18	Icm Val D'Aurelle, Montpellier, Herault, France|ICO Bordeaux, Bordeaux, France|UP Clermont Ferrand, Clermont-Ferrand, France|Chu Grenoble, Grenoble, France|IPC Marseille, Marseille, France|CRLC de Nantes, Nantes, France|APHP Hopital Cochin, Paris, France|ONCOLOPE, Toulouse, France		https://ClinicalTrials.gov/show/NCT04516707
303	NCT00242567	Study of Zoledronic Acid for Patients With Hormone-sensitive Bone Metastases From Prostate Cancer		Completed	Has Results	Prostate Cancer	Drug: Zoledronic Acid|Drug: Androgen Deprivation Therapy (ADT)	Skeletal-related Event-free Survival in Men With Bone Metastases From Prostate Cancer|Overall Survival at 18 Months and 3 Years|Time to Occurrence of Skeletal Related Event or Death|Skeletal-related Event(SRE)-Free Survival	Novartis Pharmaceuticals|Novartis	Male	18 Years and older (Adult, Older Adult)	Phase 3	522	Industry	Interventional	Allocation: Randomized|Intervention Model: Parallel Assignment|Masking: None (Open Label)|Primary Purpose: Treatment	CZOL446E2432	2023-12-05	2023-01-12	2023-01-12	2005-10-20	2013-03-06	2014-05-07	Novartis Investigative Site, Adelaide, Australia|Novartis Investigative Site, Brisbane, Australia|Novartis Investigative Site, Melbourne, Australia|Novartis Investigative Site, Port Macquarie, Australia|Novartis Investigative Site, Sydney, Australia|Novartis Investigative Site, Porto Alegre, Brazil|Novartis Investigative Site, Santo Andre, Brazil|Novartis Investigative Site, Sao Paulo, Brazil|Nov…		https://ClinicalTrials.gov/show/NCT00242567
304	NCT01347788	Cabozantinib (XL184) in Men With Castrate-Resistant Prostate Cancer		Completed	Has Results	Prostate Adenocarcinoma	Drug: cabozantinib	Partial Response in Bone Scan From Baseline to Week 6	Massachusetts General Hospital	Male	18 Years and older (Adult, Older Adult)	Phase 1	34	Other	Interventional	Allocation: Non-Randomized|Intervention Model: Single Group Assignment|Masking: None (Open Label)|Primary Purpose: Treatment	2023-11-05	April 2011	2023-05-13	2023-05-13	2011-05-04	2015-11-17	2016-11-28	Massachusetts General Hospital, Boston, Massachusetts, United States		https://ClinicalTrials.gov/show/NCT01347788
305	NCT03261544	Abductor Reattachment Methods in Proximal Femur Replacements: What is the Best Method?		Recruiting	No Results Available	Sarcoma|Bone Metastases|Proximal Femur Replacement	Procedure: Proximal Femur Replacement	Gait Analysis|Functional Outcome Questionnaire	Duke University	All	16 Years to 75 Years (Child, Adult, Older Adult)		50	Other	Observational	Observational Model: Cohort|Time Perspective: Prospective	Pro00082717	2017-11-10	2023-11-22	2023-11-27	2017-08-25		2021-11-19	Duke University, Durham, North Carolina, United States		https://ClinicalTrials.gov/show/NCT03261544
306	NCT04364724	CTFEA Myeloma Study		Not yet recruiting	No Results Available	Myeloma Multiple|Metastatic Bone Tumor	Other: CT-based finite element analysis	Change in bone strength|Quantification of bone strength|Pathological fracture|Mortality|Loss of ambulatory ability	Tel-Aviv Sourasky Medical Center|Tel Aviv University	All	18 Years to 95 Years (Adult, Older Adult)		200	Other	Observational	Observational Model: Cohort|Time Perspective: Prospective	0273-18-TLV	2020-06-01	2023-03-31	2024-03-31	April 28, 2020		April 28, 2020			https://ClinicalTrials.gov/show/NCT04364724
307	NCT01929655	Japanese BAY88-8223 Monotherapy Phase II Study		Completed	No Results Available	Prostatic Neoplasms	Drug: Radium-223 dichloride (Xofigo, BAY88-8223)	Percentage of change in total alkaline phosphatase from baseline at 12 weeks|Percentage of change in total alkaline phosphatase at the end of treatment|Percentages of change in bone ALP at 12 weeks|Percentages of change in bone ALP at the end of treatment|The proportion of subjects who have total alkaline phosphatase normalization at 12 weeks|The proportion of subjects who have total alkaline pho…	Bayer	Male	20 Years and older (Adult, Older Adult)	Phase 2	49	Industry	Interventional	Allocation: N/A|Intervention Model: Single Group Assignment|Masking: None (Open Label)|Primary Purpose: Treatment	16430	2013-09-30	2017-05-16	2017-05-16	2013-08-28		April 24, 2018	Kashiwa, Chiba, Japan|Sapporo, Hokkaido, Japan|Sapporo, Hokkaido, Japan|Kanazawa, Ishikawa, Japan|Yokohama, Kanagawa, Japan|Sendai, Miyagi, Japan|Osakasayama, Osaka, Japan|Hamamatsu, Shizuoka, Japan|Bunkyo-ku, Tokyo, Japan|Bunkyo-ku, Tokyo, Japan|Koto-ku, Tokyo, Japan|Shinjuku-ku, Tokyo, Japan|Chiba, Japan|Fukuoka, Japan|Kumamoto, Japan|Okayama, Japan		https://ClinicalTrials.gov/show/NCT01929655
308	NCT00134056	S0421, Docetaxel and Prednisone With or Without Atrasentan in Treating Patients With Stage IV Prostate Cancer and Bone Metastases That Did Not Respond to Previous Hormone Therapy		Completed	Has Results	Metastatic Cancer|Prostate Cancer	Drug: atrasentan hydrochloride|Drug: docetaxel|Drug: prednisone|Other: placebo	Compare Survival Between a Control or Standard Therapy Arm of Docetaxel Placebo Prednisone With Docetaxel Atrasentan Prednisone in Patients With Hormone Refractory Prostate Cancer.|Compare Progression-free Survival Between a Control or Standard Therapy Arm of Docetaxel Placebo Prednisone With Docetaxel Atrasentan Prednisone in Patients With Hormone Refractory Prostate Cancer.|Compare Pain Progres…	Southwest Oncology Group|National Cancer Institute (NCI)	Male	18 Years and older (Adult, Older Adult)	Phase 3	1038	Other|NIH	Interventional	Allocation: Randomized|Intervention Model: Parallel Assignment|Masking: Triple (Participant, Care Provider, Investigator)|Primary Purpose: Treatment	CDR0000439434|S0421|U10CA032102	2023-08-06	2023-02-16	2023-02-16	2005-08-24	2017-05-02	2021-10-27	Providence Cancer Center at Providence Hospital, Mobile, Alabama, United States|Alaska Regional Hospital Cancer Center, Anchorage, Alaska, United States|Fairbanks Cancer Treatment Center at Fairbanks Memorial Hospital, Fairbanks, Alaska, United States|Mayo Clinic Scottsdale, Scottsdale, Arizona, United States|Arizona Cancer Center at University of Arizona Health Sciences Center, Tucson, Arizona, …
309	NCT01224873	Diagnosis of Bone Metastases in Breast Cancer: Bone Scintigraphy, Fluoride-PET and FDG-PET		Unknown status	No Results Available	Breast Cancer			Rigshospitalet, Denmark	Female	18 Years and older (Adult, Older Adult)		110	Other	Observational	Observational Model: Cohort|Time Perspective: Prospective	H-3-2010-019	2023-10-10	2023-10-12	2023-09-13	2010-10-20		2011-01-11	Dep. of Nuclear Medicine & PET, Rigshospitalet, Copenhagen, Denmark		https://ClinicalTrials.gov/show/NCT01224873
310	NCT01407341	Beta-Tricalcium Phosphate Bone Graft in Treating Patients Undergoing Surgery For Metastatic Spine Cancer		Terminated	No Results Available	Adult Spinal Cord Neoplasm|Spinal Bone Metastases|Spinal Cord Compression	Procedure: musculoskeletal complications management/prevention|Procedure: bone graft|Procedure: quality-of-life assessment|Other: questionnaire administration	Achievement of durable posterolateral fusion|Achievement of posterolateral fusion|Occurrence of subsequent hardware failure|Requirement of additional treatment is for instability|First documentation of posterolateral fusion|Occurrence of pain or disability experienced after surgery that is related to spinal metastasis or is a consequence of the resulting treatment	University of Southern California|National Cancer Institute (NCI)	All	Child, Adult, Older Adult	Phase 1	1	Other|NIH	Interventional	Allocation: Non-Randomized|Intervention Model: Single Group Assignment|Masking: None (Open Label)|Primary Purpose: Supportive Care	0S-09-12|NCI-2011-01243	2023-06-11	2023-07-12	2023-08-12	2011-08-02		2014-02-06	University of Southern California, Los Angeles, California, United States		https://ClinicalTrials.gov/show/NCT01407341
311	NCT01345903	Robotic-Assisted Surgery in Treating Patients With Spine Tumors		Withdrawn	No Results Available	Adult Spinal Cord Neoplasm|Spinal Bone Metastases|Spinal Cord Metastases	Procedure: therapeutic conventional surgery	Complication rates with 95% confidence bounds of 31% or smaller|Estimated blood loss|Operation duration|Complication rate|Demographic and clinical data such as stage, grade and histology	City of Hope Medical Center|National Cancer Institute (NCI)	All	18 Years and older (Adult, Older Adult)	Not Applicable	0	Other|NIH	Interventional	Allocation: N/A|Intervention Model: Single Group Assignment|Masking: None (Open Label)|Primary Purpose: Treatment	09202|NCI-2011-00691	2023-12-12	2023-06-13		2011-05-02		2012-11-09			https://ClinicalTrials.gov/show/NCT01345903
312	NCT00410813	S0622, Dasatinib in Treating Patients With Stage IV Breast Cancer That Has Spread to the Bone		Completed	Has Results	Breast Cancer|Metastatic Cancer	Drug: dasatinib	Progression-free Survival|Response Rate (Complete and Partial, Confirmed and Unconfirmed)|MUC-1 Antigen Response|Circulating Tumor Cells (CTC) Response Rate|Change in Serum Bone Turnover Markers Over Time -- NTx|Change in Serum Bone Turnover Markers Over Time -- BAP|Change in Serum Bone Turnover Markers Over Time|Change in Serum Bone Turnover Markers Over Time -- OC|Change in Serum Bone Turnover …	Southwest Oncology Group|National Cancer Institute (NCI)	All	18 Years and older (Adult, Older Adult)	Phase 2	85	Other|NIH	Interventional	Allocation: Randomized|Intervention Model: Parallel Assignment|Masking: None (Open Label)|Primary Purpose: Treatment	CDR0000520348|S0622|U10CA032102	2023-03-07	2023-01-13	2023-01-14	2006-12-13	2017-07-02	2017-07-02	Providence Cancer Center at Providence Hospital, Mobile, Alabama, United States|Alaska Regional Hospital Cancer Center, Anchorage, Alaska, United States|Providence Cancer Center, Anchorage, Alaska, United States|Highlands Oncology Group - Springdale, Bentonville, Arkansas, United States|Arkansas Cancer Research Center at University of Arkansas for Medical Sciences, Little Rock, Arkansas, United S…		https://ClinicalTrials.gov/show/NCT00410813
313	NCT01499043	Pilot Study of PLX3397 in Patients With Advanced Castration-Resistant Prostate Cancer (CRPC)		Terminated	Has Results	Prostate Cancer	Drug: PLX3397	Summary of High Circulating Tumor Cell Count Number In Men With Radiographically Progressive Castration-Resistant Prostate Cancer and High Circulating Tumor Cells|Number of Participants Reporting Treatment-Related Adverse Events by System Organ Class and Preferred Term|Number of Participants Reporting Treatment-Emergent Adverse Events by Worst Severity Grade	Daiichi Sankyo, Inc.|Plexxikon	Male	18 Years and older (Adult, Older Adult)	Phase 2	6	Industry	Interventional	Allocation: N/A|Intervention Model: Single Group Assignment|Masking: None (Open Label)|Primary Purpose: Treatment	PLX108-06	2012-05-25	2013-03-11	2013-03-11	2011-12-26	2019-10-18	2020-03-04	Massachusetts General Hospital, Boston, Massachusetts, United States|Memorial Sloan-Kettering Cancer Center, New York, New York, United States		https://ClinicalTrials.gov/show/NCT01499043
314	NCT00080782	Doxorubicin and Strontium-89 With or Without Celecoxib in Treating Patients With Progressive Androgen-Independent Prostate Cancer and Bone Metastases		Terminated	No Results Available	Metastatic Cancer|Prostate Cancer	Drug: Celecoxib|Drug: Doxorubicin Hydrochloride|Radiation: Strontium chloride Sr 89	Time to prostate-specific antigen progression	M.D. Anderson Cancer Center|National Cancer Institute (NCI)	Male	Child, Adult, Older Adult	Phase 2	14	Other|NIH	Interventional	Allocation: Randomized|Intervention Model: Single Group Assignment|Masking: None (Open Label)|Primary Purpose: Treatment	ID02-035|P50CA090270|P30CA016672|MDA-ID-02035|CDR0000355360	2023-02-02	April 2004	2023-01-05	April 8, 2004		2018-10-31	M.D. Anderson Cancer Center at University of Texas, Houston, Texas, United States		https://ClinicalTrials.gov/show/NCT00080782
315	NCT02145286	Phase 1/2 Study to Determine Optimal Dose for Treating Bone Metastases Using Novel STAT-RT Workflow		Unknown status	No Results Available	Metastatic Bone Lesion	Radiation: Stereotactic Body Radiation Therapy	Radiation Dose|Single Treatment Pain Scores|Paired Dose Pain Score Comparison|Post Treatment Measures	Paul W. Read, MD|University of Virginia	All	18 Years and older (Adult, Older Adult)	Not Applicable	47	Other	Interventional	Allocation: N/A|Intervention Model: Single Group Assignment|Masking: None (Open Label)|Primary Purpose: Treatment	16964	2023-10-13	2023-01-19	2023-01-19	2014-05-22		2018-06-12	University of Virginia Health System, Charlottesville, Virginia, United States		https://ClinicalTrials.gov/show/NCT02145286
316	NCT00365105	Zoledronate, Vitamin D, and Calcium With or Without Strontium 89 or Samarium 153 in Preventing or Delaying Bone Problems in Patients With Bone Metastases From Prostate Cancer, Lung Cancer, or Breast Cancer		Completed	Has Results	Breast Cancer|Lung Cancer|Metastatic Cancer|Pain|Prostate Cancer	Dietary Supplement: Calcium|Dietary Supplement: Vitamin D|Drug: zoledronic acid|Drug: Sm-153|Radiation: Sr-89	Time to Development of a Malignant Skeletal-related Events (SRE)|Number of Patients Experiencing a Skeletal-related Event (SRE) Within One Year|Overall Survival|Change in Functional Assessment of Cancer Therapy - General (FACT-G) at One Year|Change in Brief Pain Inventory (BPI) at One Year|Change in EuroQol-5 Dimension 3-level (EQ-5D-3L) at One Year	Radiation Therapy Oncology Group|National Cancer Institute (NCI)|NRG Oncology	All	18 Years and older (Adult, Older Adult)	Phase 3	261	Other|NIH	Interventional	Allocation: Randomized|Intervention Model: Parallel Assignment|Masking: None (Open Label)|Primary Purpose: Supportive Care	RTOG 0517|CDR0000491233|NCI-2009-00727	2006-07-11	2023-01-12	2017-02-27	2006-08-17	2014-11-10	2019-06-14	Providence Cancer Center at Providence Hospital, Mobile, Alabama, United States|Roy and Patricia Disney Family Cancer Center at Providence Saint Joseph Medical Center, Burbank, California, United States|Mercy Cancer Center at Mercy San Juan Medical Center, Carmichael, California, United States|USC/Norris Comprehensive Cancer Center and Hospital, Los Angeles, California, United States|Robert and B…		https://ClinicalTrials.gov/show/NCT00365105
317	NCT00899665	Proteases in Patients With Prostate Cancer That Has Spread to the Bone		Completed	No Results Available	Anemia|Metastatic Cancer|Myelodysplastic Syndromes|Precancerous Condition|Prostate Cancer	Genetic: fluorescence in situ hybridization|Genetic: microarray analysis|Genetic: molecular diagnostic method|Other: immunohistochemistry staining method|Other: laboratory biomarker analysis|Procedure: biopsy|Procedure: immunoscintigraphy	Expression and activity of proteases and related molecules	Barbara Ann Karmanos Cancer Institute|National Cancer Institute (NCI)	Male	40 Years and older (Adult, Older Adult)		31	Other|NIH	Observational		CDR0000483773|P30CA022453|WSU-D-2111|WSU-12-35-99(M02)	2023-07-01	2023-09-06	2023-01-08	2009-05-12		2014-02-11	Barbara Ann Karmanos Cancer Institute, Detroit, Michigan, United States		https://ClinicalTrials.gov/show/NCT00899665
318	NCT05244382	Overcome, a Program of Therapeutic Exercise and Functional Recovery to Improve the Functional Capacity of Women With Breast Cancer and Bone Metastases		Recruiting	No Results Available	Breast Neoplasm Female|Neoplasm Metastasis|Spinal Neoplasms	Other: Overcome	Functional capacity|Quality of life (QLQ)|hand strength|Lower limb strength|Body composition|Muscle architecture of multifidus muscle|Pain threshold on pressure, by algometry|Anxiety and depression|Opioid consumption and pain|Specific quality of life of the patient with bone metastasis	Universidad de Granada	Female	18 Years and older (Adult, Older Adult)	Not Applicable	58	Other	Interventional	Allocation: Randomized|Intervention Model: Parallel Assignment|Masking: Single (Outcomes Assessor)|Primary Purpose: Treatment	Overcome project	2022-02-07	2023-02-24	2023-02-24	2022-02-17		2022-05-18	Faculty of Health Sciences, Granada, Spain		https://ClinicalTrials.gov/show/NCT05244382
319	NCT04928820	68Ga-PSMA-11 PET/CT for the Diagnosis of Bone Metastases in Patients With Prostate Cancer and Biochemical Progression During Androgen Deprivation Therapy		Recruiting	No Results Available	Biochemically Recurrent Prostate Carcinoma|Metastatic Malignant Neoplasm in the Bone|Metastatic Prostate Carcinoma|Stage IV Prostate Cancer American Joint Committee on Cancer (AJCC) v8|Stage IVA Prostate Cancer AJCC v8|Stage IVB Prostate Cancer AJCC v8	Procedure: Computed Tomography|Other: Gallium Ga 68 Gozetotide|Procedure: Positron Emission Tomography	Per-patient detection rate of gallium Ga 68 gozetotide (68Ga-PSMA-11) positron emission tomography (PET)/computed tomography (CT)|Number of lesions found by PSMA PET and bone scan CT|Rate of M1 detection|Per-patient positive predictive value (PPV)|PSA progression-free survival (PFS)|Overall survival (OS)|Incidence of adverse events	Jonsson Comprehensive Cancer Center	Male	18 Years and older (Adult, Older Adult)	Phase 2	102	Other	Interventional	Allocation: N/A|Intervention Model: Single Group Assignment|Masking: None (Open Label)|Primary Purpose: Diagnostic	21-000102|NCI-2021-03575	2021-06-16	2024-07-01	2025-07-01	2021-06-16		2022-08-03	University of California at Los Angeles / Jonsson Comprehensive Cancer Center, Los Angeles, California, United States		https://ClinicalTrials.gov/show/NCT04928820
320	NCT02454543	Impact of Radical Prostatectomy as Primary Treatment in Patients With Prostate Cancer With Limited Bone Metastases	g-RAMPP	Active, not recruiting	No Results Available	Prostate Cancer	Procedure: Radical prostatectomy|Drug: Best systemic therapy	Cancer specific survival|Developement of castration-resistance measured by PSA value|Overall survival|Progression-free survival	Martini-Klinik am UKE GmbH|Förderverein Hilfe bei Prostatakrebs e.V.	Male	18 Years to 75 Years (Adult, Older Adult)	Not Applicable	452	Other	Interventional	Allocation: Randomized|Intervention Model: Parallel Assignment|Masking: None (Open Label)|Primary Purpose: Treatment	G-RAMPP_MK-2014|AP 75/13	2023-05-15	2023-12-19	2026-12-31	2015-05-27		2022-05-12	Markus Graefen, Hamburg, Nein, Germany		https://ClinicalTrials.gov/show/NCT02454543
321	NCT01952054	Denosumab for Breast Cancer With Bone Mets		Terminated	Has Results	Breast Cancer	Drug: Denosumab	The Effect of Denosumab in Reducing Circulating Tumor Cells (CTCs) Among Breast Cancer Patients With Bone Metastases.|The Changes of Epithelial-mesenchymal Transition (EMT) in CTCs|The Changes in Urine N-telopeptide Level	M.D. Anderson Cancer Center|Amgen	Female	18 Years and older (Adult, Older Adult)	Phase 2	7	Other|Industry	Interventional	Allocation: N/A|Intervention Model: Single Group Assignment|Masking: None (Open Label)|Primary Purpose: Treatment	2013-0007|NCI-2014-01273	2015-02-09	2018-10-10	2018-10-10	2013-09-27	2019-11-22	2019-11-22	University of Texas MD Anderson Cancer Center, Houston, Texas, United States	"Study Protocol and Statistical Analysis Plan", https://ClinicalTrials.gov/ProvidedDocs/54/NCT01952054/Prot_SAP_000.pdf	https://ClinicalTrials.gov/show/NCT01952054
322	NCT01816048	NaF Positron Emission Tomography/Computed Tomography (PET/CT)Imaging to Assess Treatment Responsiveness to TAK-700 in Patients With Castrate Resistant Prostate Cancer (CRPC) With Bone Metastasis		Terminated	Has Results	Prostatic Neoplasms|Prostate Cancer	Drug: TAK-700|Radiation: Fluorine F 18 Sodium Fluoride|Procedure: Positron Emission Tomography|Procedure: Computed Tomography	Number of Participants With a Change in Maximum NaF PET/CT Standardized Uptake Values|Number of Participants With Change in Prostate Specific Antigen (PSA) Response Rate|Number of Participants With a Change in Total NaF PET/CT Standardized Uptake Values|Number of Subjects Who Experience Adverse Events While on Treatment With TAK 700|Number of Patients With a Measurable Change in PSA Kinetics With…	University of Wisconsin, Madison|Millennium Pharmaceuticals, Inc.	Male	18 Years and older (Adult, Older Adult)	Phase 2	8	Other|Industry	Interventional	Allocation: N/A|Intervention Model: Single Group Assignment|Masking: None (Open Label)|Primary Purpose: Treatment	CO12810|2012-1107|NCI-2013-01081|A534260|SMPH\MEDICINE\HEM-ONC	2023-05-13	2023-12-15	2023-11-16	2013-03-21	2017-07-19	2019-12-09	University of Wisconsin Carbone Cancer Center, Madison, Wisconsin, United States		https://ClinicalTrials.gov/show/NCT01816048
323	NCT00003903	Effect of Androgen Suppression on Bone Loss in Patients With or Without Bone Metastases Secondary to Prostate Cancer		Completed	No Results Available	Osteoporosis|Prostate Cancer	Procedure: management of therapy complications		University of Rochester|National Cancer Institute (NCI)	Male	Child, Adult, Older Adult	Not Applicable	150	Other|NIH	Interventional	Primary Purpose: Supportive Care	CDR0000067078|P30CA011198|URCC-U2898|NCI-G99-1522	1999-07-01	2023-08-07	2023-08-07	2003-01-27		2013-10-16	James P. Wilmot Cancer Center, Rochester, New York, United States		https://ClinicalTrials.gov/show/NCT00003903
324	NCT03996473	Study to Test the Safety and How Radium-223 Dichloride an Alpha Particle-emitting Radioactive Agent Works in Combination With Pembrolizumab an Immune Checkpoint Inhibitor in Patients With Stage IV Non-small Cell Lung Cancer With Bone Metastases		Active, not recruiting	No Results Available	Carcinoma, Non-Small-Cell Lung	Drug: Radium-223 dichloride (Xofigo, BAY 88-8223)|Drug: Pembrolizumab	Number of participants with adverse events (AEs) in Phase 1|Number of participants with dose limiting toxicities (DLTs) in Phase 1|Objective response rate (ORR) per Response Evaluation Criteria in Solid Tumors (RECIST) v1.1 in Phase 2|ORR per RECIST v1.1 in Phase 1|Duration of response (DoR) per RECIST v1.1 in Phase 1|Disease control rate (DCR) per RECIST v1.1 in Phase 1|DoR per RECIST v1.1 in Ph…	Bayer|Merck Sharp & Dohme LLC	All	18 Years and older (Adult, Older Adult)	Phase 1	164	Industry	Interventional	Allocation: Randomized|Intervention Model: Sequential Assignment|Masking: None (Open Label)|Primary Purpose: Treatment	19781|2018-003704-39	2020-03-06	April 14, 2021	2023-01-23	2019-06-24		2022-09-07	Ccare San Marcos Cancer Center & Urology, San Marcos, California, United States|UZ Gent, Gent, Belgium|Nederlands Kanker Instituut, Amsterdam, Netherlands|Ciutat Sanitària i Universitaria de la Vall d'Hebron, Barcelona, Spain|Hospital Clínic i Provincial de Barcelona, Barcelona, Spain|Hospital Universitario 12 de Octubre, Madrid, Spain		https://ClinicalTrials.gov/show/NCT03996473
325	NCT00099541	Non-small Cell Lung Cancer Registry		Completed	No Results Available	Non-Small-Cell Lung Cancer|Pleural Effusion, Malignant	Drug: zoledronic acid	Group 1: Time to the first occurrence of an skeletal related event (SRE) in unresectable stage IIIB/IV NSCLC patients with bone metastases|Group 2: Observational|Patients with an SRE will be evaluated for:|Time from stage IIIB/IV NSCLC diagnosis to progression to bone|Time from bone metastasis diagnosis to presentation of clinical symptoms of skeletal complications|The effect of serum NTX levels …	Novartis Pharmaceuticals|Novartis	All	18 Years and older (Adult, Older Adult)	Phase 4	300	Industry	Interventional	Allocation: Non-Randomized|Intervention Model: Single Group Assignment|Masking: None (Open Label)|Primary Purpose: Treatment	CZOL446EUS99|US99|Z-NEXT	2023-11-04		2023-11-07	2004-12-16		2009-11-23	Birmingham Hematology and Oncology Associates, Birmingham, Alabama, United States|Hembree Cancer Center-St. Edward Mercy Medical Center, Fort Smith, Arkansas, United States|Pacific Cancer Medical Center Inc., Anaheim, California, United States|Bay Area Cancer Research Group, Concord, California, United States|Fresno Hem/Onc Medical Group, Fresno, California, United States|Beaver Med Group, Highla…		https://ClinicalTrials.gov/show/NCT00099541
326	NCT00003884	Zoledronate in Treating Patients With Solid Tumors That Have Spread to the Bone		Completed	No Results Available	Hypercalcemia of Malignancy|Lung Cancer|Metastatic Cancer|Pain|Unspecified Adult Solid Tumor, Protocol Specific	Drug: zoledronic acid|Procedure: quality-of-life assessment		Novartis	All	18 Years and older (Adult, Older Adult)	Phase 3	600	Industry	Interventional	Allocation: Randomized|Primary Purpose: Supportive Care	CDR0000067052|NOVARTIS-4244603011	1998-08-01	2023-01-01	2023-01-01	2004-07-22		2013-02-21	SORRA Research Center, Birmingham, Alabama, United States|Brookwood ACCC, Birmingham, Alabama, United States|University of Alabama Comprehensive Cancer Center, Birmingham, Alabama, United States|Highlands Oncology Group, Springdale, Arkansas, United States|Columbia South Valley Hospital, Gilroy, California, United States|Pacific Shores Medical Group, Long Beach, California, United States|Veterans…		https://ClinicalTrials.gov/show/NCT00003884
327	NCT00005073	Zoledronate Plus Standard Therapy Compared With Placebo Plus Standard Therapy to Prevent Bone Metastases in Patients With Recurrent Prostate Cancer That Has No Symptoms		Terminated	No Results Available	Prostate Cancer	Drug: zoledronic acid		Novartis Pharmaceuticals|Novartis	Male	18 Years and older (Adult, Older Adult)	Phase 3	544	Industry	Interventional	Allocation: Randomized|Primary Purpose: Treatment	NOVARTIS-CZOL4460704|UCLA-9908030|CDR0000067678|NCI-G00-1722	1999-09-01	2023-03-03	2023-03-03	2004-06-18		2013-05-01	Jonsson Comprehensive Cancer Center, UCLA, Los Angeles, California, United States		https://ClinicalTrials.gov/show/NCT00005073
328	NCT02346526	A Biomarker Study of Standard-of-care Radium-223 Chloride for Metastatic Castration-resistant Prostate Cancer		Completed	Has Results	Prostate Cancer|Castration-resistant Prostate Cancer|Castration-resistant Prostate Cancer Metastatic to Bone	Procedure: Blood Tests|Procedure: CT scan|Procedure: FACBC PET/MRI in a subset of participants|Drug: Radium-223 dichloride|Procedure: bone scan	Bone Scan Index|Percentage of Skeletal Mass Occupied by a Lesion, Stratified by 18 Month Survival Status|Circulating Tumor Cell (CTC) Number|Circulating Biomarkers of the Tumor Microenvironment|Baseline Pain Score Evaluation as a Predictor of Survival|Baseline Global Health Score Evaluation as a Predictor of Survival	Massachusetts General Hospital|Bayer	Male	18 Years and older (Adult, Older Adult)	Phase 2	22	Other|Industry	Interventional	Allocation: N/A|Intervention Model: Single Group Assignment|Masking: None (Open Label)|Primary Purpose: Treatment	14-375|ONC-2013-119	April 2015	2023-10-19	2023-12-20	2015-01-27	2022-09-29	2022-09-29	Massachusetts General Hospital, Boston, Massachusetts, United States	"Study Protocol and Statistical Analysis Plan", https://ClinicalTrials.gov/ProvidedDocs/26/NCT02346526/Prot_SAP_000.pdf|"Informed Consent Form", https://ClinicalTrials.gov/ProvidedDocs/26/NCT02346526/ICF_001.pdf	https://ClinicalTrials.gov/show/NCT02346526
329	NCT04170634	Tumoral Bone Strength Assessment by Numerical Simulation Using Quantitative CT : the MEKANOS Study	MEKANOS	Recruiting	No Results Available	Metastases to Bone|Metastatic Breast Cancer|Metastatic NSCLC	Other: Evaluation of the fracture risk using data from routine qCT (quantitative Computed Tomography) scan and numerical simulation	Measurement of mechanical strength of tumor proximal femur or tumor vertebrae obtained by numerical simulation using the finite element analysis (FEA) method.	Hospices Civils de Lyon	All	18 Years and older (Adult, Older Adult)		220	Other	Observational	Observational Model: Case-Only|Time Perspective: Prospective	69HCL17_0642	2019-11-28	2023-10-21	2023-10-22	2019-11-20		2021-07-27	Service de rhumatologie, CHU d'Angers, Angers, France|Service de radiothérapie, Institut Jean-Perrin, Clermont-Ferrand, France|Service de rhumatologie, CH Annemasse, Contamine-sur-Arve, France|Service de rhumatologie, CHU de Grenoble, La Tronche, France|Service d'onco-rhumatologie, Centre Oscar Lombret, Lille, France|Service de Radiothérapie, Centre Léon Bérard, 28 Prom. Léa et Napoléon Bullukian…		https://ClinicalTrials.gov/show/NCT04170634
330	NCT02406521	Exploratory Study of Radium-223 and VEGF-Targeted Therapy in Patients With Metastatic Renal Cell Carcinoma and Bone Mets		Completed	No Results Available	Metastatic Renal Cell Carcinoma	Drug: Pazopanib|Drug: Sorafenib|Drug: Radium-223	Biomarkers of osteoblast and osteoclast activity|Symptomatic skeletal events (SSEs)|Time to SSE|Quality of life using the FKSI-19|Pain using the Brief Pain Inventory (Short Form)|Analgesic use|Overall response rate by RECIST version 1.1|Duration of response by RECIST version 1.1|Overall survival|Progression-free survival|Response as determined by PERCIST Criteria|Response as determined by MDA Bon…	Dana-Farber Cancer Institute|Bayer	All	18 Years and older (Adult, Older Adult)	Phase 1	30	Other|Industry	Interventional	Allocation: Non-Randomized|Intervention Model: Parallel Assignment|Masking: None (Open Label)|Primary Purpose: Treatment	14-523	April 2015	2023-12-17	2019-12-31	April 2, 2015		2020-03-04	Massachusetts General Hospital, Boston, Massachusetts, United States|Dana Farber Cancer Institute, Boston, Massachusetts, United States		https://ClinicalTrials.gov/show/NCT02406521
331	NCT01233557	Biomarkers of Bone Resorption in Metastatic Prostate Cancer		Completed	No Results Available	Metastatic Prostate Cancer			University of Aberdeen	Male	40 Years to 80 Years (Adult, Older Adult)		40	Other	Observational	Observational Model: Case-Only|Time Perspective: Prospective	10/S0802/36	2023-09-10	2023-08-14	2023-08-14	2010-11-03		2015-11-05	Aberdeen Royal Infirmary, Aberdeen, United Kingdom		https://ClinicalTrials.gov/show/NCT01233557
332	NCT00399802	A Study to Examine the Effects of an Experimental Drug on Women With Breast Cancer and Metastatic Bone Disease (MBD)(0822-016)(COMPLETED)		Completed	Has Results	Breast Cancer|Metastatic Bone Disease	Drug: ZA|Drug: Odanacatib|Drug: Odanacatib matching placebo|Drug: ZA matching placebo	Percentage Change From Baseline in Urinary N-telopeptide of Type I Collagen (u-NTx) at Week 4|Number of Participants Who Experienced an Adverse Event (AE)|Number of Participants Who Discontinued Treatment Due to an AE|Percentage Change From Baseline in Urinary Deoxypyridinoline (u-DPD) at Week 4	Merck Sharp & Dohme LLC	Female	18 Years and older (Adult, Older Adult)	Phase 2	43	Industry	Interventional	Allocation: Randomized|Intervention Model: Parallel Assignment|Masking: Double (Participant, Investigator)|Primary Purpose: Treatment	0822-016|2006_533|MK-0822-016	2006-11-16	2007-12-05	2007-12-05	2006-11-15	2018-02-01	2018-08-16			https://ClinicalTrials.gov/show/NCT00399802
333	NCT00019695	Ketoconazole With or Without Alendronate Sodium in Treating Patients With Metastatic Prostate Cancer		Terminated	No Results Available	Stage IV Prostate Cancer|Bone Metastases|Adenocarcinoma of the Prostate|Recurrent Prostate Cancer	Drug: alendronate sodium|Drug: ketoconazole		National Cancer Institute (NCI)		18 Years and older (Adult, Older Adult)	Phase 2		NIH	Interventional	Primary Purpose: Treatment	CDR0000066964|NCI-99-C-0052	1999-03-01		2023-03-05	2007-03-05		April 22, 2014	Medicine Branch, Bethesda, Maryland, United States		https://ClinicalTrials.gov/show/NCT00019695
334	NCT02382653	Oral Piroxicam Versus Buccal Fentanyl in Breakthrough Pain		Completed	No Results Available	Neoplasm Metastases	Drug: oral perixicam	analgesic scale (assessmet of VAS immeditally after analgesic adminstration)	Tanta University	All	18 Years to 60 Years (Adult)	Not Applicable	100	Other	Interventional	Allocation: Randomized|Intervention Model: Parallel Assignment|Masking: Quadruple (Participant, Care Provider, Investigator, Outcomes Assessor)|Primary Purpose: Supportive Care	391159	2023-12-14	April 2015	April 2015	2015-03-09		2016-05-13			https://ClinicalTrials.gov/show/NCT02382653
335	NCT04071223	Testing the Addition of a New Anti-cancer Drug, Radium-223 Dichloride, to the Usual Treatment (Cabozantinib) for Advanced Renal Cell Cancer That Has Spread to the Bone, the RadiCaL Study		Recruiting	No Results Available	Advanced Renal Cell Carcinoma|Chromophobe Renal Cell Carcinoma|Clear Cell Renal Cell Carcinoma|Collecting Duct Carcinoma|Kidney Medullary Carcinoma|Metastatic Malignant Neoplasm in the Bone|Papillary Renal Cell Carcinoma|Stage IV Renal Cell Cancer AJCC v8|Unclassified Renal Cell Carcinoma	Drug: Cabozantinib S-malate|Other: Quality-of-Life Assessment|Other: Questionnaire Administration|Radiation: Radium Ra 223 Dichloride	Symptomatic skeletal event (SSE)-free survival (FS)|Incidence of adverse events|SSE-FS|Progression-free survival|Overall survival|Time to first SSE|Overall response rate (ORR)	National Cancer Institute (NCI)	All	18 Years and older (Adult, Older Adult)	Phase 2	210	NIH	Interventional	Allocation: Randomized|Intervention Model: Parallel Assignment|Masking: None (Open Label)|Primary Purpose: Treatment	NCI-2019-05619|A031801|U10CA180821	2019-12-13	2024-10-01	2024-10-01	2019-08-28		2022-10-05	University of Alabama at Birmingham Cancer Center, Birmingham, Alabama, United States|UC San Diego Moores Cancer Center, La Jolla, California, United States|University of California Davis Comprehensive Cancer Center, Sacramento, California, United States|Rush University Medical Center, Chicago, Illinois, United States|University of Chicago Comprehensive Cancer Center, Chicago, Illinois, United St…		https://ClinicalTrials.gov/show/NCT04071223
336	NCT05078151	Whole-Body Diffusion-Weighted Magnetic Resonance Imaging (MRI) as a Response Biomarker for Metastatic Prostate Cancer	iPROMET	Recruiting	No Results Available	Prostate Cancer Metastatic	Diagnostic Test: Whole-Body Diffusion Weighted MRI	Changes in diffusion-weighted MRI as response biomarker|Early response biomarker identification|Intra-tumor heterogenous response evaluation	Vall d'Hebron Institute of Oncology|Prostate Cancer Foundation|Instituto de Salud Carlos III|Hospital Vall d'Hebron|Fundacio Puigvert	Male	18 Years and older (Adult, Older Adult)	Not Applicable	69	Other	Interventional	Allocation: N/A|Intervention Model: Single Group Assignment|Masking: None (Open Label)|Primary Purpose: Diagnostic	ipromet21	2018-09-01	2022-09-01	2023-09-01	2021-10-14		2021-10-14	Vall d'Hebron Institute of Oncology, Barcelona, Spain		https://ClinicalTrials.gov/show/NCT05078151
337	NCT00459654	A Placebo-controlled Phase II Study of Bone-targeted Radium-223 in Symptomatic Hormone-refractory Prostate Cancer		Completed	No Results Available	Prostate Cancer|Neoplasm Metastasis	Drug: Radium-223 dichloride (BAY88-8223)|Drug: Saline	Time to occurrence of Skeletal-related Events (SRE)|Relative change (%) in bone-ALP levels from baseline to 4 weeks after last injection|Number of SREs per patient|Changes in the levels of biochemical markers of bone formation|Change in Prostate Specific Antigen (PSA)|Change in pain level|Changes in analgesic use during study period|Changes in Edmonton Symptom Assessment Scale (ESAS) from baselin…	Bayer	Male	40 Years and older (Adult, Older Adult)	Phase 2	64	Industry	Interventional	Allocation: Randomized|Intervention Model: Parallel Assignment|Masking: Quadruple (Participant, Care Provider, Investigator, Outcomes Assessor)|Primary Purpose: Treatment	15280|BC1-02	2023-02-04	2023-05-06	2023-05-07	April 12, 2007		2014-06-25	Linköping, Sweden|Sundsvall, Sweden|Nottingham, United Kingdom		https://ClinicalTrials.gov/show/NCT00459654
338	NCT00545129	A Study Of Tanezumab as Add-On Therapy to Opioid Medication In Patients With Pain Due To Cancer That Has Spread To Bone		Completed	Has Results	Neoplasm Metastasis|Palliative Care	Drug: Tanezumab 10 mg IV|Drug: IV Placebo for tanezumab	Change From Baseline in Daily Average Pain Intensity Numeric Rating Scale (NRS) Score at Week 6|Change From Baseline in Daily Average Pain Intensity Numeric Rating Scale (NRS) Score at Weeks 1, 2, 4, 8, 12 and 16|Change From Baseline in Daily Worst Pain Intensity Numeric Rating Scale (NRS) Score at Week 1, 2, 4, 6, 8, 12 and 16: Baseline Observation Carried Forward (BOCF)|Change From Baseline in …	Pfizer	All	18 Years and older (Adult, Older Adult)	Phase 2	59	Industry	Interventional	Allocation: Randomized|Intervention Model: Parallel Assignment|Masking: Quadruple (Participant, Care Provider, Investigator, Outcomes Assessor)|Primary Purpose: Treatment	A4091003|2008-005181-31|CANCER PAIN POC	April 29, 2009	2011-12-24	2012-02-07	2007-10-17	2021-06-18	2021-06-18	UCSD Center for Pain Medicine, La Jolla, California, United States|UCSD Medical Center - Thornton Hospital, La Jolla, California, United States|UCSD Moores Cancer Center, La Jolla, California, United States|Indiana Pain and Spine Clinic, South Bend, Indiana, United States|WK River Cities Clinical Research Center, Shreveport, Louisiana, United States|Willis Knighton Pierremont Health Center, Shrev…		https://ClinicalTrials.gov/show/NCT00545129
339	NCT02232685	Whole Body Bone Scan vs 18F-Choline PET/CT in Prostate Cancer		Completed	No Results Available	Prostate Cancer	Device: 18F-Choline PET/CT	Metastases to bone (yes/no)	Odense University Hospital	Male	Child, Adult, Older Adult	Not Applicable	143	Other	Interventional	Allocation: N/A|Intervention Model: Single Group Assignment|Masking: None (Open Label)|Primary Purpose: Diagnostic	MAM_PROSTAGE1	2023-09-14	2023-07-16	2023-07-16	2014-09-05		2016-10-11	Odense University Hospiatal, Odense, Denmark		https://ClinicalTrials.gov/show/NCT02232685
340	NCT04660591	Length of the Femoral Stem in Arthroplasty Done for Patients With Proximal Femoral Metastatic Lesion		Completed	No Results Available	Metastatic Bone Tumor|Pathological Fracture|Arthroplasty	Device: femoral stem in hip arthroplasty	MSTS score|survival|visual analogue score|the Eastern Cooperative Oncology Group (ECOG) Scale of Performance Status|complications	Ain Shams University	All	18 Years and older (Adult, Older Adult)	Not Applicable	24	Other	Interventional	Allocation: Non-Randomized|Intervention Model: Parallel Assignment|Masking: Single (Participant)|Primary Purpose: Treatment	FMASU MD 277/ 2019	2019-11-01	2021-05-01	2021-05-30	2020-12-09		2021-07-20	AinShams university, Cairo, Abbasid, Egypt		https://ClinicalTrials.gov/show/NCT04660591
341	NCT02107664	The Palliative Radiotherapy And Inflammation Study - PRAIS	PRAIS	Completed	No Results Available	Neoplasm Metastasis|Bone Neoplasms	Radiation: Palliative RT for bone cancer pain	Pain response|Cachexia|Depression	Norwegian University of Science and Technology|European palliative care research centre|St. Olavs Hospital|Alesund Hospital|Oslo University Hospital	All	18 Years and older (Adult, Older Adult)		580	Other	Observational	Observational Model: Cohort|Time Perspective: Prospective	2013/1126	2023-12-13	2023-12-17	2023-12-18	April 8, 2014		2019-03-22	Dept of Oncology, Oslo Universitetssykehus, Oslo, Norway|Dept of Oncology, St Olavs Hospital, Trondheim, Norway|Dept of Oncology, Ålesund sjukehus, Ålesund, Norway		https://ClinicalTrials.gov/show/NCT02107664
342	NCT03143322	Standard Treatment SBRT in Solid Tumors Patients With Between 1 and 3 Bone-only Metastases	STEREO-OS	Recruiting	No Results Available	Metastatic Breast Cancer|Metastatic Lung Cancer|Metastatic Prostate Cancer|Bone Metastases	Radiation: SBRT	Progression Free Survival|PFS at 2 and 3 years|Bone progression free survival at 1, 2 and 3 years|Local control at 1, 2 and 3 years|Cancer-specific survival|Overall survival|SBRT toxicities|Patient's Quality of life|Pain score|Cost utility	UNICANCER|National Cancer Institute, France	All	18 Years to 75 Years (Adult, Older Adult)	Not Applicable	196	Other	Interventional	Allocation: Randomized|Intervention Model: Parallel Assignment|Masking: None (Open Label)|Primary Purpose: Treatment	UC-0107/1603	2018-01-24	2026-01-24	2027-07-24	2017-05-08		2022-02-22	Institut Sainte Catherine, Avignon, France|Clinique Tivoli Ducos, Bordeaux, France|Institut Bergonié, Bordeaux, France|Pôle Leonard de Vinci, Chambray-lès-Tours, France|Hôpital Métropole Savoie, Chambéry, France|Hôpital Henri Mondor, Créteil, France|Centre Léonard de Vinci, Dechy, France|Centre Georges Francois Leclerc, Dijon, France|Institut de Cancérologie de Bourgogne, Dijon, France|Chu Grenob…		https://ClinicalTrials.gov/show/NCT03143322
343	NCT03202381	Phase IV Study to Evaluate Bone Mineral Density in No-bone Metastatic Prostate Cancer Treated With Degarelix	BLADE	Unknown status	No Results Available	Prostate Cancer	Drug: Degarelix	Changes in fat body mass|changes in bone mineral density|changes in lean body mass|changes in fasting serum lipids|changes in bone turn-over markers|changes in insulin sensitivity|changes in serum follicle stimulating hormone (FSH) levels	Azienda Socio Sanitaria Territoriale degli Spedali Civili di Brescia|Ferring Pharmaceuticals	Male	18 Years and older (Adult, Older Adult)	Phase 4	35	Other|Industry	Interventional	Allocation: N/A|Intervention Model: Single Group Assignment|Masking: None (Open Label)|Primary Purpose: Other	NP2540-BLADE	2017-06-26	2023-03-19	2023-03-20	2017-06-28		2017-06-28	Clinical Department of Urology, university Hospital Spedali Civili di Brescia, Brescia, Italy		https://ClinicalTrials.gov/show/NCT03202381
344	NCT02729103	Treatment Patterns in Metastatic Prostate Cancer		Completed	No Results Available	Prostatic Neoplasm	Drug: Xofigo (Radium 223 dichloride,BAY88-8223)	Distribution of treatment types among lines of therapy|Time to treatment (days)|Duration of treatment (days)|Number of patients on each drug or drug combination|Number of inpatient visits per patient|Length of hospital stay (days) among those with an inpatient visit|Number of outpatient visits per patient|Number of emergency room (ER) visits per patient|Number of physician office visits per patie…	Bayer	Male	45 Years and older (Adult, Older Adult)		565	Industry	Observational	Observational Model: Cohort|Time Perspective: Retrospective	18695	2016-10-31	2017-01-19	2017-01-19	April 6, 2016		2018-01-25	Whippany, New Jersey, United States		https://ClinicalTrials.gov/show/NCT02729103
345	NCT03414437	Post-eRADicAte - A Long Term Follow up of Subjects That Completed the eRADicAte Study (NCT 02097303)	Post-eRADicAte	Unknown status	No Results Available	Prostate Cancer Metastatic		To investigate the overall survival of subjects that completed the "eRADicAte" study.|To investigate subsequent prostate cancer therapies and medications of subjects that completed the "eRADicAte" study.|To investigate radiographic changes of subjects that completed the "eRADicAte" study.|To investigate SSE's of subjects that completed the "eRADicAte" study|To investigate the incidence of bone ma…	Carolina Research Professionals, LLC|Bayer	Male	Child, Adult, Older Adult		31	Other|Industry	Observational	Observational Model: Case-Only|Time Perspective: Other	CRP-PCA-01.1	2017-10-01	2021-10-01	2021-10-01	2018-01-30		2019-03-19	Chesapeake urology Research Associates, Towson, Maryland, United States|Urology Cancer Center and GU Research Network, Omaha, Nebraska, United States|Associated Medical Professionals, Syracuse, New York, United States|Oregon Urology Institute, Springfield, Oregon, United States|Carolina Urologic Research Center, Myrtle Beach, South Carolina, United States		https://ClinicalTrials.gov/show/NCT03414437
346	NCT01488851	Study to Assess Incidence of ONJ in Pts With Bone Mets Starting Zoledronic Acid Treatment		Completed	No Results Available	Cancer			King Faisal Specialist Hospital & Research Center	All	18 Years to 80 Years (Adult, Older Adult)		100	Other	Observational	Observational Model: Cohort|Time Perspective: Prospective	2111-094	2023-01-12	2023-01-14	2023-01-15	2011-12-08		2019-03-01	King Faisal Specialist Hospital& Research Center, Riyadh, Saudi Arabia		https://ClinicalTrials.gov/show/NCT01488851
347	NCT02258464	Study of Radium-223 Dichloride Versus Placebo and Hormonal Treatment as Background Therapy in Subjects With Bone Predominant HER2 (Human Epidermal Growth Factor Receptor 2) Negative Hormone Receptor Positive Metastatic Breast Cancer		Terminated	Has Results	Breast Neoplasms	Drug: Radium-223 dichloride (Xofigo, BAY88-8223)|Drug: Placebo (saline)|Other: Background hormonal therapy	Symptomatic Skeletal Event Free Survival (SSE-FS)|Overall Survival|Time to Opiate Use for Cancer Pain|Time to Pain Progression|Pain Improvement Rate|Time to Cytotoxic Chemotherapy|Radiological Progression-free Survival (rPFS)|Number of Participants With Treatment-emergent Adverse Events|Number of Participants With Post-treatment Adverse Events Including Additional Malignancies and Chemotherapy Re…	Bayer	Female	18 Years and older (Adult, Older Adult)	Phase 2	99	Industry	Interventional	Allocation: Randomized|Intervention Model: Parallel Assignment|Masking: Quadruple (Participant, Care Provider, Investigator, Outcomes Assessor)|Primary Purpose: Treatment	16298|2014-002113-39	2015-03-02	2019-08-13	2019-08-13	2014-10-07	2020-08-10	2020-08-10	Bakersfield, California, United States|La Jolla, California, United States|Aurora, Colorado, United States|New Haven, Connecticut, United States|Cedar Rapids, Iowa, United States|Annapolis, Maryland, United States|Ann Arbor, Michigan, United States|Pontiac, Michigan, United States|Saint Louis, Missouri, United States|Pittsburgh, Pennsylvania, United States|Houston, Texas, United States|Linz, Ober…	"Statistical Analysis Plan", https://ClinicalTrials.gov/ProvidedDocs/64/NCT02258464/SAP_000.pdf|"Study Protocol", https://ClinicalTrials.gov/ProvidedDocs/64/NCT02258464/Prot_001.pdf	https://ClinicalTrials.gov/show/NCT02258464
348	NCT00438828	Dexamethasone for the Prophylaxis of Pain Flare Study		Completed	No Results Available	Cancer	Drug: dexamethasone	Complete control of pain flare on days 1-5 after the completion of radiation treatment.|Complete control of pain flare from Day 6-10 after the completion of radiation treatment.|Functional interference especially mood and sleep in Brief Pain Inventory will be monitored.|Quality of life outcomes	Sunnybrook Health Sciences Centre	All	18 Years and older (Adult, Older Adult)	Phase 1	61	Other	Interventional	Allocation: N/A|Intervention Model: Single Group Assignment|Masking: None (Open Label)|Primary Purpose: Treatment	SP-14-0055|Sunnybrook REB# 057-2008	2023-02-07	2023-07-11	2023-07-11	2007-02-22		2014-11-19	Odette Cancer Centre, Toronto, Ontario, Canada		https://ClinicalTrials.gov/show/NCT00438828
349	NCT03453905	Evaluation of the Ability of CT-based Finite Element Analysis (CTFEA) to Predict Fractures in Patients With Metastases: a Randomized Controlled Study.	ZYCTFEA	Unknown status	No Results Available	Bone Neoplasm of Hip (Diagnosis)|Orthopedic Disorder|Bone Metastases|Proximal Femoral Metaphyseal Abnormality	Diagnostic Test: CTFEA|Other: Conventional decision algorithm	Primary efficacy hypothesis|Composite endpoint	Tel-Aviv Sourasky Medical Center	All	18 Years to 120 Years (Adult, Older Adult)	Not Applicable	162	Other	Interventional	Allocation: Randomized|Intervention Model: Parallel Assignment|Masking: None (Open Label)|Primary Purpose: Prevention	0532-17-TLV	2018-03-01	2022-03-01	2022-03-01	2018-03-05		2018-03-05			https://ClinicalTrials.gov/show/NCT03453905
350	NCT02258451	Study of Radium-223 Dichloride in Combination With Exemestane and Everolimus Versus Placebo in Combination With Exemestane and Everolimus in Subjects With Bone Predominant HER2 Negative Hormone Receptor Positive Metastatic Breast Cancer		Active, not recruiting	Has Results	Breast Neoplasms	Drug: Radium-223 dichloride (Xofigo, BAY88-8223)|Drug: Placebo (saline)|Drug: Exemestane|Drug: Everolimus	Symptomatic Skeletal Event-free Survival (SSE-FS)|Overall Survival|Time to Opiate Use for Cancer Pain|Time to Pain Progression|Time to Cytotoxic Chemotherapy|Radiological Progression-free Survival (rPFS)|Percentage of Participants With Pain Improvement|Number of Participants With Treatmemt-emergent Adverse Events (TEAEs)|Number of Participants With Post-treatment Chemotherapy Related Adverse Even…	Bayer	Female	18 Years and older (Adult, Older Adult)	Phase 2	283	Industry	Interventional	Allocation: Randomized|Intervention Model: Parallel Assignment|Masking: Quadruple (Participant, Care Provider, Investigator, Outcomes Assessor)|Primary Purpose: Treatment	17096|2014-002114-23	2015-06-04	2020-01-22	2022-10-30	2014-10-07	2022-03-10	2022-09-30	Yuma, Arizona, United States|La Jolla, California, United States|Long Beach, California, United States|Los Angeles, California, United States|New Haven, Connecticut, United States|Hollywood, Florida, United States|Ashland, Kentucky, United States|Rockville, Maryland, United States|Ann Arbor, Michigan, United States|Detroit, Michigan, United States|Pontiac, Michigan, United States|Rochester, Minne…	"Study Protocol", https://ClinicalTrials.gov/ProvidedDocs/51/NCT02258451/Prot_000.pdf|"Statistical Analysis Plan", https://ClinicalTrials.gov/ProvidedDocs/51/NCT02258451/SAP_001.pdf	https://ClinicalTrials.gov/show/NCT02258451
351	NCT01907880	The ODYSSEY TRIAL Phase IV Trial Evaluating the Palliative Benefit of Pamidronate or Zoledronic Acid in Breast Cancer	ER11-03	Completed	No Results Available	Breast Cancer	Drug: Pamidronate|Drug: Zoledronic acid|Drug: placebo	sCTX values|Palliative response	Ottawa Hospital Research Institute|Canadian Breast Cancer Foundation	Female	18 Years and older (Adult, Older Adult)	Phase 4	74	Other	Interventional	Allocation: Randomized|Intervention Model: Parallel Assignment|Masking: Triple (Participant, Care Provider, Investigator)|Primary Purpose: Treatment	2011349-01H	2023-08-12	2023-01-16	2023-01-16	2013-07-25		2017-07-07	The Ottawa Hospital Cancer Centre, Ottawa, Ontario, Canada		https://ClinicalTrials.gov/show/NCT01907880
352	NCT02034552	A Randomized Phase IIa Efficacy and Safety Study of Radium-223 Dichloride With Abiraterone Acetate or Enzalutamide in Metastatic Castration-resistant Prostate Cancer (CRPC)		Completed	Has Results	Prostatic Neoplasms	Drug: Radium-223 dichloride (Xofigo, BAY88-8223)|Drug: Abiraterone acetate|Drug: Prednisone|Drug: Enzalutamide	Patient Bone Scan Response Rate|Bone Scan Lesion Area|Radiological Progression Free Survival|Time to Radiological Progression|Time to Radiological Bone Progression|Time to First Symptomatic Skeletal Event|Symptomatic Skeletal Event-free Survival|Overall Survival	Bayer	Male	18 Years and older (Adult, Older Adult)	Phase 2	68	Industry	Interventional	Allocation: Randomized|Intervention Model: Parallel Assignment|Masking: None (Open Label)|Primary Purpose: Treatment	16544	2014-03-07	2016-07-15	2018-06-26	2014-01-13	2017-07-02	2019-07-23	Scottsdale, Arizona, United States|Tucson, Arizona, United States|Los Angeles, California, United States|New Haven, Connecticut, United States|Newark, Delaware, United States|Washington, District of Columbia, United States|Plantation, Florida, United States|Indianapolis, Indiana, United States|New Orleans, Louisiana, United States|Shreveport, Louisiana, United States|Rockville, Maryland, United S…		https://ClinicalTrials.gov/show/NCT02034552
353	NCT01565746	Safety, Biodistribution, Radiation Dosimetry and Pharmacokinetics Study of BAY88-8223 in Japanese Patients		Completed	No Results Available	Prostatic Neoplasms	Drug: Radium-223 dichloride (Xofigo, BAY88-8223)	Number of participants with Critical toxicities|Maximum drug concentration in blood after single dose administration (Cmax) of BAY88-8223 for blood samples|Area under the concentration - time curve (AUC) of BAY88-8223 for blood samples|Changes in prostate specific antigen (PSA)|Overall Survival	Bayer	Male	20 Years and older (Adult, Older Adult)	Phase 1	19	Industry	Interventional	Allocation: Non-Randomized|Intervention Model: Parallel Assignment|Masking: None (Open Label)|Primary Purpose: Treatment	15354	2023-03-12	2023-10-12	April 2016	2012-03-29		2016-10-17	Kashiwa, Chiba, Japan|Yokohama, Kanagawa, Japan|Osakasayama, Osaka, Japan		https://ClinicalTrials.gov/show/NCT01565746
354	NCT00909142	Bonefos and the Consumption of Analgesics	BICAM	Completed	No Results Available	Bone Neoplasms	Drug: Bonefos (Clodronate, BAY94-8393)	Analgesics consumption after 12 months of treatment with Bonefos in patients with bone metastases and breast or prostate cancer or multiple myeloma|Decrease in pain measured by VAS (Visual Analogue Scale)	Bayer	All	18 Years and older (Adult, Older Adult)		149	Industry	Observational	Observational Model: Cohort|Time Perspective: Prospective	14236|Bonefos	April 2007	2023-02-09	2023-02-09	2009-05-27		April 6, 2012	Many locations, Czech Republic		https://ClinicalTrials.gov/show/NCT00909142
355	NCT01696760	Aspirin and Compression Devices for VTE Prophylaxis in Orthopaedic Oncology		Completed	Has Results	Bone Metastases|Musculoskeletal Cancer|Soft Tissue Sarcoma|Thromboembolism	Drug: acetylsalicylic acid|Drug: enoxaparin|Device: PCD	DVT Incident Rate|Pulmonary Embolism Rate|Development of Other Complications (Including Bleeding Complications)|Readmission Rate to Hopsital|Hematoma Formation|Excessive Wound Drainage|Death Rate	Ohio State University Comprehensive Cancer Center	All	18 Years and older (Adult, Older Adult)	Not Applicable	12	Other	Interventional	Allocation: Randomized|Intervention Model: Parallel Assignment|Masking: None (Open Label)|Primary Purpose: Supportive Care	OSU-10055|NCI-2012-00894	2023-10-10	2023-12-12	2023-12-12	2012-10-01	2014-07-04	2018-12-05	Ohio State University Medical Center, Columbus, Ohio, United States		https://ClinicalTrials.gov/show/NCT01696760
356	NCT04483414	68Ga PSMA-11 PET/CT in Recurrent Prostate Cancer		Recruiting	No Results Available	Prostate Cancer|Prostate Cancer Metastatic|Prostate Cancer Metastatic to Bone	Drug: 68Ga PSMA-11 injection|Procedure: Positron Emission Tomography/Computed Tomography	Location of recurrence|Residual prostate cancer	Dana Mathews|University of Texas Southwestern Medical Center	Male	18 Years and older (Adult, Older Adult)	Phase 2	50	Other	Interventional	Allocation: N/A|Intervention Model: Single Group Assignment|Masking: None (Open Label)|Primary Purpose: Diagnostic	STU-2020-0488	2021-03-19	2023-09-19	2024-09-01	2020-07-23		2022-02-07	UT Southwestern Medical Center, Dallas, Texas, United States		https://ClinicalTrials.gov/show/NCT04483414
357	NCT00424983	Study of Zoledronic Acid Administered Monthly Versus Every 3 Months in Multiple Myeloma and Breast Cancer Patients Who Were Treated With Zoledronic Acid the Prior Year		Completed	No Results Available	Multiple Myeloma|Breast Cancer	Drug: Zoledronic acid	Sequential plasmas concentrations of zoledronic acid collected at 13 study visits between visit 2 to visit 17|Sequential urine concentrations of zoledronic acid collected at 9 study visits between visit 2 to visit 13|Pharmacodynamic outcomes will be measured by the concentration of bone resorption markers at all visits.|Efficacy outcomes will be measured throughout the study by number and time to…	Novartis Pharmaceuticals|Novartis	All	18 Years to 75 Years (Adult, Older Adult)	Phase 1	18	Industry	Interventional	Allocation: Randomized|Intervention Model: Single Group Assignment|Masking: None (Open Label)|Primary Purpose: Treatment	CZOL446E2105|2007-004719-73	2023-11-06	2023-11-09	2023-11-09	2007-01-22		2020-12-21	Oncotherapeutics, West Hollywood, California, United States|Rocky Mountain Cancer Centers RMCC, Greenwood Village, Colorado, United States|Norwalk Hospital, Norwalk, Connecticut, United States|Hillman Cancer Center, Pittsburgh, Pennsylvania, United States|Huntsman Cancer Institute Univ. of Utah, Salt Lake City, Utah, United States|University of Vermont Fletcher Allen Health Care, Burlington, Verm…		https://ClinicalTrials.gov/show/NCT00424983
358	NCT01308489	Minimally Invasive Surgery in Treating Patients With Spinal Tumors		Terminated	No Results Available	Adult Spinal Cord Neoplasm|Recurrent Adult Spinal Cord Neoplasm|Spinal Bone Metastases|Spinal Cord Metastases	Procedure: therapeutic conventional surgery|Procedure: quality-of-life assessment	Estimated blood loss (EBL); in milliliters (ml)|Length of operation (OR time)|Complication rate|Neurological preservation|Length of stay|Pain symptoms|Assessment of neurologic function using the ASIA (American Spinal Injury Association) Impairment Scale|Evaluation of arthrodesis	City of Hope Medical Center|National Cancer Institute (NCI)	All	18 Years and older (Adult, Older Adult)	Not Applicable	7	Other|NIH	Interventional	Allocation: Randomized|Intervention Model: Parallel Assignment|Masking: None (Open Label)|Primary Purpose: Treatment	10115|NCI-2011-00231	2023-05-12	2023-06-14	2023-06-14	2011-03-04		2015-06-08	City of Hope Medical Center, Duarte, California, United States		https://ClinicalTrials.gov/show/NCT01308489
359	NCT04177056	Stereotactic Body Radiotherapy for Osseous Low Alpha-Beta Resistant Metastases for Pain Relief	SOLAR-P	Recruiting	No Results Available	Bone Metastases|Prostate Cancer|Breast Cancer|Renal Cell Carcinoma|Melanoma	Radiation: SBRT	Overall Pain Response|Acute Toxicity|Late Toxicity|Patient-reported Quality of Life|Local Control|Rate of Reirradiation/Salvage Surgery	Hamilton Health Sciences Corporation|Juravinski Cancer Centre Foundation	All	18 Years and older (Adult, Older Adult)	Not Applicable	40	Other	Interventional	Allocation: N/A|Intervention Model: Single Group Assignment|Masking: None (Open Label)|Primary Purpose: Treatment	7905	2020-12-04	2022-03-01	2023-01-01	2019-11-26		2021-08-02	Juravinski Cancer Centre, Hamilton, Ontario, Canada	"Study Protocol", https://ClinicalTrials.gov/ProvidedDocs/56/NCT04177056/Prot_000.pdf	https://ClinicalTrials.gov/show/NCT04177056
360	NCT00609934	Study of Sorafenib and Palliative Radiotherapy in Kidney Cancer That Spreads to the Bone		Completed	No Results Available	Renal Cell Carcinoma	Drug: Sorafenib|Radiation: external beam radiotherapy	Reduction in pain from index lesion 4 weeks following the completion of radiotherapy, assessed using Brief Pain Inventory.|reduction in pain in index lesion at study termination assessed using Brief Pain Inventory|acute toxicity of palliative radiotherapy and sorafenib together|acute toxicity of sorafenib alone|biologic response of the index lesion to radiotherapy and sorafenib assessed using FDG…	University Health Network, Toronto	All	18 Years and older (Adult, Older Adult)	Phase 1|Phase 2	12	Other	Interventional	Allocation: N/A|Intervention Model: Single Group Assignment|Masking: None (Open Label)	DDPDRO-004|UHN REB 07-0357-C	2023-12-07	2023-10-14	2023-10-14	2008-02-07		2015-07-23	Princess Margaret Hosptial, Toronto, Ontario, Canada		https://ClinicalTrials.gov/show/NCT00609934
361	NCT03823534	Post-Op Pain Control for Prophylactic Intramedullary Nailing.		Recruiting	No Results Available	Bone Metastases|Lymphoma|Multiple Myeloma|Opioid Use|Pain	Drug: Ketorolac|Drug: Normal saline|Drug: Acetaminophen|Drug: Oxycodone Acetaminophen|Drug: Morphine|Drug: Hydrocodone/Acetaminophen|Drug: Oxycodone	Milligram Morphine Equivalent (MME) of Opioid Medications Utilized|Patient Reported Outcomes Measurement System (PROMIS) Pain Intensity Scale|Single Assessment Numerical Evaluation (SANE)|Numerical Rating Scale (NRS)	St. Louis University	All	18 Years and older (Adult, Older Adult)	Phase 3	60	Other	Interventional	Allocation: Randomized|Intervention Model: Parallel Assignment|Masking: Double (Participant, Investigator)|Primary Purpose: Treatment	28927	2019-02-20	2024-08-01	2024-10-01	2019-01-30		2021-12-03	Saint Louis University, Saint Louis, Missouri, United States		https://ClinicalTrials.gov/show/NCT03823534
362	NCT00872157	BMTP-11 in Patients With Castrate-Resistant Prostate Cancer With Bone Mets		Completed	No Results Available	Prostate Cancer	Drug: BMTP-11	Highest tolerable dose of BMTP-11 defined by dose-limiting toxicity	M.D. Anderson Cancer Center	Male	18 Years and older (Adult, Older Adult)	Phase 1	10	Other	Interventional	Allocation: N/A|Intervention Model: Single Group Assignment|Masking: None (Open Label)|Primary Purpose: Treatment	2008-0395|NCI-2012-01626	2023-03-09	2023-10-15		2009-03-31		2015-10-23	University of Texas MD Anderson Cancer Center, Houston, Texas, United States		https://ClinicalTrials.gov/show/NCT00872157
363	NCT02274623	Effect of CTAP101 Capsules on Ca/iPTH in Advanced Breast/Prostate Cancer Patients Treated With Denosumab/Zoledronic Acid		Completed	No Results Available	Breast Cancer|Prostate Cancer|Bone Neoplasms|Hypocalcemia|Hyperparathyroidism, Secondary	Drug: CTAP101 Capsules	Effect of repeated, escalating doses of CTAP101 on serum calcium and plasma iPTH levels|Effect of repeated, escalating daily doses of CTAP101 on serum calcifediol|Safety and tolerability of CTAP101|Effect of repeated, escalating daily doses of CTAP101 on vitamin d metabolites|Effect of repeated, escalating doses of CTAP101 on serum phosphorus and spot urine calcium:creatinine ratio	OPKO Health, Inc.	All	18 Years and older (Adult, Older Adult)	Phase 1	33	Industry	Interventional	Allocation: N/A|Intervention Model: Single Group Assignment|Masking: None (Open Label)|Primary Purpose: Supportive Care	CTAP101-CL-1017	2023-12-14	2017-02-27	2017-03-17	2014-10-24		2019-09-27	Coast Hematology-Oncology Associates, Long Beach, California, United States|Mount Sinai Medical Center, Comprehensive Cancer Center, Miami, Florida, United States|Research by Design LLC, Evergreen Park, Illinois, United States|Roswell Park Cancer Institute, Buffalo, New York, United States|University of Cincinnati Cancer Institute, Cincinnati, Ohio, United States|Inova Dwight and Martha Schar Can…		https://ClinicalTrials.gov/show/NCT02274623
364	NCT00760370	Comparison of Zometa Retention and Effect in Multiple Myeloma and Breast Cancer		Completed	No Results Available	Multiple Myeloma|Breast Cancer	Drug: Zoledronic Acid	Amount of Zometa retained in body|Changes in bone markers	Vejle Hospital|Odense University Hospital|Novartis	Female	Child, Adult, Older Adult	Phase 2	60	Other|Industry	Interventional	Allocation: N/A|Intervention Model: Single Group Assignment|Masking: None (Open Label)|Primary Purpose: Treatment	2007-003777-13	2023-12-08	2023-12-11	2023-12-11	2008-09-26		2011-12-07	Odense University Hospital, Odense, Denmark|Vejle Hospital, Vejle, Denmark		https://ClinicalTrials.gov/show/NCT00760370
365	NCT01588821	Cabozantinib in Advanced Solid Malignancies		Completed	Has Results	Lung Cancer|Solid Tumor (Not Breast or Prostate Cancers)	Drug: Cabozantinib	Number of Participants With Bone Bio-marker Response|Number of Patients With Skeletal-related Events (SRE)|Quality of Life as Assessed by FACT-G|Overall Tumor Response Rate|MET Amplification in Tumor Sample|Response to Cabozantinib in Bone Metastatic Disease|Time to SRE	Massachusetts General Hospital	All	18 Years and older (Adult, Older Adult)	Phase 2	37	Other	Interventional	Allocation: N/A|Intervention Model: Single Group Assignment|Masking: None (Open Label)|Primary Purpose: Treatment	1991-12-01	2023-06-12	2023-01-17	2023-06-19	2012-05-01	2018-01-10	2020-09-29	Massachusetts General Hospital, Boston, Massachusetts, United States		https://ClinicalTrials.gov/show/NCT01588821
366	NCT02887833	Thermal Testing in Bone Pain (TiBoP)	TiBoP	Completed	No Results Available	Cancer Induced Bone Pain|Secondary Malignant Neoplasm of Bone|Toxicity Due to Radiotherapy|Pain	Other: Clinical biomarker (thermal sensory testing)	Sensitivity and specificity of the thermal sensitivity score in CIBP with respect to experiencing a "positive outcome" after XRT|Sensitivity and specificity of thermal testing with respect to experiencing a positive outcome|Change in validated self report measures of the pain experience	University of Edinburgh|NHS Lothian	All	18 Years to 100 Years (Adult, Older Adult)		27	Other	Observational	Observational Model: Cohort|Time Perspective: Prospective	16/SC/0260	2023-10-16	2023-12-19	2023-12-19	2016-09-02		2021-06-23	Edinburgh Cancer Centre, Edinburgh, United Kingdom		https://ClinicalTrials.gov/show/NCT02887833
367	NCT03204942	Dorsal Root Ganglion Thermal Radiofrequency Versus Pulsed Radiofrequency for Metastatic Pain in Thoracic Vertebral Body		Completed	Has Results	Bone Neoplasm,Malignant Vertebral Column Thoracic Secondary	Device: PRF on DRG|Device: TRF on DRG|Drug: Corticosteroid injection	The European Organisation for Research and Treatment of Cancer (EORTC) Questionnaire to Measure Change in the Intensity of Pain QLQ-C30|EORTC QLQ-BM22|Visual Analog Scale (VAS), to Evaluate Pain|Oswestry Low Back Pain Disability Questionnaire (ODI),|Number of Participants With Any Complications|To Measure Change in Analgesic Usage|Patients' Satisfaction, Descriptive Scale	National Cancer Institute, Egypt	All	18 Years and older (Adult, Older Adult)	Not Applicable	69	Other	Interventional	Allocation: Randomized|Intervention Model: Parallel Assignment|Masking: Triple (Participant, Care Provider, Outcomes Assessor)|Primary Purpose: Supportive Care	CdGrPfMiPnB	2017-02-14	2018-07-30	2018-07-30	2017-07-02	2020-07-07	2020-07-07	Sherry Nabil Elia Fanous, Cairo, Egypt	"Study Protocol and Statistical Analysis Plan", https://ClinicalTrials.gov/ProvidedDocs/42/NCT03204942/Prot_SAP_000.pdf	https://ClinicalTrials.gov/show/NCT03204942
368	NCT02599142	Comparing Immobilisation Shells in Cranial Radiotherapy	CORIOLIS	Completed	No Results Available	Brain Metastases|Bone Metastases|Brain Tumor, Primary|Brain Tumor Adult|Brain Tumor - Metastatic	Device: Group A: Closed-face shell|Device: Group B: Open-face shell	Assessment of treatment verification imaging to determine inter-fraction reproducability of immobilisation shells|Timing data|Assessment of imaging to determine intra-fraction motion|Patient acceptance and tolerability of immobilisation shells (pre-treatment)|Patient acceptance and tolerability of immobilisation shells (1st fraction)|Patient acceptance and tolerability of immobilisation shells (l…	Royal Marsden NHS Foundation Trust|National Institute for Health Research, United Kingdom	All	18 Years and older (Adult, Older Adult)	Not Applicable	41	Other	Interventional	Allocation: Randomized|Intervention Model: Parallel Assignment|Masking: None (Open Label)|Primary Purpose: Treatment	CCR4362	2023-11-15	2018-10-22	2018-10-22	2015-11-06		2020-05-05	Royal Marsden Hospital NHS Foundation Trust, London, United Kingdom		https://ClinicalTrials.gov/show/NCT02599142
369	NCT00130494	Zoledronic Acid Administration to Metastatic Breast Cancer Patients With Non-symptomatic Bone Lesions		Terminated	No Results Available	Breast Cancer|Neoplasm Metastasis	Drug: Zoledronic acid	Time to first bone metastases|Quality of life per treatment arm|The Number of Participants Who Experienced Adverse Events (AE)	Spanish Breast Cancer Research Group|Novartis	Female	18 Years to 70 Years (Adult, Older Adult)	Phase 3	97	Other|Industry	Interventional	Allocation: Randomized|Intervention Model: Parallel Assignment|Masking: None (Open Label)|Primary Purpose: Treatment	GEICAM 2001-05	2002-08-29	2006-11-20	2007-10-22	2005-08-15		April 16, 2019	Spanish Breast Cancer Research Group (GEICAM), San Sebastián de los Reyes, Madrid, Spain		https://ClinicalTrials.gov/show/NCT00130494
370	NCT00040755	BMS-275291 in Treating Patients With Prostate Cancer That Has Not Responded to Hormone Therapy		Completed	No Results Available	Adenocarcinoma of the Prostate|Bone Metastases|Hormone-resistant Prostate Cancer|Recurrent Prostate Cancer|Stage IV Prostate Cancer	Drug: rebimastat|Other: laboratory biomarker analysis	Progression free survival (PFS)|PFS|Toxicities assessed for type, severity, time or onset, time of resolution, and the probability of association with the study regiment using National Cancer Institute (NCI) Common Toxicity Criteria (CTC) version 2.0	National Cancer Institute (NCI)	Male	Child, Adult, Older Adult	Phase 2	68	NIH	Interventional	Allocation: Randomized|Intervention Model: Parallel Assignment|Masking: None (Open Label)|Primary Purpose: Treatment	NCI-2013-00041|PHII-32|N01CM17101|N01CM17102|CDR0000069402	2023-05-02	2023-07-06		2003-01-27		2013-02-01	UC Davis Comprehensive Cancer Center, Sacramento, California, United States		https://ClinicalTrials.gov/show/NCT00040755
371	NCT00858585	Genetic Risk of Osteonecrosis of the Jaw (ONJ) in Patients With Metastatic Cancer: Concordance Study		Completed	No Results Available	Breast Cancer		Single nucleotide polymorphisms	University of Michigan Rogel Cancer Center	Female	18 Years and older (Adult, Older Adult)		149	Other	Observational	Observational Model: Other|Time Perspective: Prospective	UMCC 2008.066|HUM 22831	2023-03-09	2023-05-11	2023-09-16	2009-03-10		2019-10-10	University of Michigan, Ann Arbor, Michigan, United States		https://ClinicalTrials.gov/show/NCT00858585
372	NCT01345019	Denosumab Compared to Zoledronic Acid in the Treatment of Bone Disease in Patients With Multiple Myeloma		Completed	Has Results	Cancer|Hematologic Malignancies|Multiple Myeloma|Oncology|Bone Metastases|Multiple Myeloma Bone Lesions	Drug: Denosumab|Drug: Zoledronic acid|Drug: Placebo to Denosumab|Drug: Placebo to zoledronic acid|Drug: Denosumab (for the open-label treatment phase)	Time to First On-study Skeletal Related Event|Percentage of Participants With an On-study Skeletal Related Event|Kaplan-Meier Estimate of Percentage of Participants With an On-study Skeletal Related Event|Time to First On-study Skeletal Related Event - Superiority Analysis|Time to First and Subsequent On-Study Skeletal Related Event - Number of Events Per Patient|Time to First and Subsequent On-S…	Amgen|Daiichi Sankyo, Inc.	All	18 Years and older (Adult, Older Adult)	Phase 3	1718	Industry	Interventional	Allocation: Randomized|Intervention Model: Parallel Assignment|Masking: Quadruple (Participant, Care Provider, Investigator, Outcomes Assessor)|Primary Purpose: Supportive Care	20090482|2010-020454-34	2012-05-17	2016-07-19	2019-03-29	April 29, 2011	2018-03-07	2020-03-31	Research Site, Tucson, Arizona, United States|Research Site, Fayetteville, Arkansas, United States|Research Site, Anaheim, California, United States|Research Site, Campbell, California, United States|Research Site, Encinitas, California, United States|Research Site, Fresno, California, United States|Research Site, Pleasant Hill, California, United States|Research Site, Santa Barbara, California, …		https://ClinicalTrials.gov/show/NCT01345019
373	NCT01168141	Window Study of ZD4054 in Metastatic Prostate Cancer		Unknown status	No Results Available	Prostate Cancer|Metastasis	Drug: ZD4054	Changes in tissue biomarkers|Changes in blood-borne biomarkers|Changes in imaging biomarkers	The Christie NHS Foundation Trust|AstraZeneca	Male	18 Years and older (Adult, Older Adult)	Not Applicable	30	Other|Industry	Interventional	Allocation: N/A|Intervention Model: Single Group Assignment|Masking: None (Open Label)|Primary Purpose: Basic Science	08_CLPHA_54	2023-07-09	2023-09-10	2023-09-10	2010-07-23		2010-07-23	The Christie NHS Foundation Trust, Manchester, United Kingdom		https://ClinicalTrials.gov/show/NCT01168141
374	NCT03325127	Outcomes of mCRPC Patients Treated With Ra-223 Concomitant With Abiraterone or Enzalutamide- A Chart Review Study		Withdrawn	No Results Available	Prostatic Neoplasms, Castration-Resistant	Drug: radium Ra 223 dichloride (Xofigo, BAY88-8223)|Drug: Zytiga|Drug: Xtandi	Survival rates|Disease progression|Skeletal related events (SRE)|Symptomatic Skeletal Events (SSE)|Time to death|Sequence of treatment regimens|Dose schedule|Duration of therapy|Time to first visceral metastasis|Proportion of patients developing visceral metastasis	Bayer	Male	40 Years and older (Adult, Older Adult)		0	Industry	Observational	Observational Model: Cohort|Time Perspective: Retrospective	19706	2017-10-30	2018-09-28	2018-09-28	2017-10-30		2018-10-31			https://ClinicalTrials.gov/show/NCT03325127
375	NCT00492843	Loading Dose or Standard Dose of Intravenous Ibandronate in Treating Patients With Lung Cancer and Skeletal Metastasis		Terminated	No Results Available	Lung Cancer	Drug: Ibandronate (Bondronat)	bone pain response (=25% decrease in mean pain score with a maximum of 15% increase in mean analgesic consumption)|Efficacy: ECOG Performance status, Analgesic consumption, bone marker Safety: AE, laboratory parameters	Chinese Society of Lung Cancer	All	18 Years and older (Adult, Older Adult)	Phase 4	20	Other	Interventional	Allocation: Randomized|Intervention Model: Parallel Assignment|Masking: None (Open Label)|Primary Purpose: Treatment	CSLC0701	2023-07-07	2023-01-08	2023-07-08	2007-06-27		2016-02-17	Guangdong Provincial People's Hospital, Guangzhou, Guangdong, China|Zhejiang Cancer Hospital, Hangzhou, Zhejiang, China|Beijing Cancer Hospital, Beijing, China|Sun Yat-sen University Cancer Center, Guangzhou, China|The Tumor Hospital of Harbin Medical University, Harbin, China|Shanghai Chest Hospital, Shanghai, China|Shanghai Pulmonary Hospital, Shanghai, China|General Hospital of Tianjin Medical…		https://ClinicalTrials.gov/show/NCT00492843
376	NCT05527483	Digital PET/CT Using [Ga-68]PSMA vs. [F-18]NaF for Evaluation of Osseous Metastatic Involvement in Prostate Cancer Patients		Recruiting	No Results Available	Prostate Cancer	Drug: [68Ga]PSMA|Drug: Flourine-18 [F-18] Sodium Fluoride (NaF)|Diagnostic Test: PET/CT	Uptake of [Ga-68]PSMA as measured by lesion by lesion analysis|Focally increased [Ga-68]PSMA uptake as measured by PET/CT	University Hospitals Cleveland Medical Center	Male	18 Years and older (Adult, Older Adult)		40	Other	Observational	Observational Model: Cohort|Time Perspective: Prospective	STUDY20220121	April 21, 2022	2022-09-30	2022-09-30	2022-09-02		2022-09-02	Case Comprehensive Cancer Center, Cleveland, Ohio, United States		https://ClinicalTrials.gov/show/NCT05527483
377	NCT01992016	A Pilot Study to Enhance F18 FDG-PET Imaging of Prostate Cancers With the Metabolic Inhibitor Ranolazine		Completed	Has Results	Adenocarcinoma of the Prostate|Bone Metastases|Soft Tissue Metastases|Stage IIA Prostate Cancer|Stage IIB Prostate Cancer|Stage III Prostate Cancer|Stage IV Prostate Cancer	Drug: Ranolazine	Number of Participants With Increase in SUV Uptake	University of Colorado, Denver	Male	19 Years and older (Adult, Older Adult)	Not Applicable	11	Other	Interventional	Allocation: Non-Randomized|Intervention Model: Single Group Assignment|Masking: None (Open Label)|Primary Purpose: Diagnostic	13-1908.cc|NCI-2013-02000	April 7, 2014	2016-10-08	April 11, 2018	2013-11-25	2018-06-04	2018-12-03	University of Colorado Cancer Center, Aurora, Colorado, United States		https://ClinicalTrials.gov/show/NCT01992016
378	NCT04232761	Study to Gather Information on the Safety and How Radium-223 Dichloride, an Alpha Particle-emitting Radioactive Agent, Works Under Routine Clinical Practice in Taiwan in Patients With Castration-resistant Prostate Cancer (CRPC) Which Has Spread to the Bone	RAPIT	Recruiting	No Results Available	Castration-resistant Prostate Cancer	Drug: Radium-223 dichloride (Xofigo, BAY88-8223)	Incidence of treatment-emergent adverse events (TEAEs)|Incidence of drug-related TEAEs|Descriptive analysis of long-term safety information during the extended follow-up period|Overall survival|Time to the first symptomatic skeletal event (SSE)|Proportion of patients with total ALP (tALP) response|Proportion of patients with PSA response|Change in pain status|Change in ECOG-PS	Bayer	Male	Child, Adult, Older Adult		300	Industry	Observational	Observational Model: Cohort|Time Perspective: Prospective	21124	2020-07-07	2024-03-31	2024-03-31	2020-01-18		2022-08-22	Many locations, Multiple Locations, Taiwan		https://ClinicalTrials.gov/show/NCT04232761
379	NCT00868582	The National Oncologic PET Registry	NOPR	Unknown status	No Results Available	Cancer	Other: PET scanning in cancer	To assess the effect of PET on referring physicians' plans of intended patient management of patients with cancer types eligible for inclusion in the National Oncologic PET Registry.	American College of Radiology Imaging Network|World Molecular Imaging Society (formerly Academy of Molecular Imaging)	All	Child, Adult, Older Adult		333000	Other	Observational	Observational Model: Other|Time Perspective: Prospective	NOPR	2023-05-06	2023-12-20	2023-06-21	2009-03-25		2020-08-25	American College of Radiology Imaging Network, Philadelphia, Pennsylvania, United States		https://ClinicalTrials.gov/show/NCT00868582
380	NCT01703065	Cabozantinib in Men With Castration-Resistant Prostate Cancer		Terminated	Has Results	Adenocarcinoma of the Prostate|Castration-resistant Prostate Cancer|Recurrent Prostate Cancer|Stage III Prostate Cancer|Stage IV Prostate Cancer	Drug: Cabozantinib	Change in Urinary N-telopeptide (uNTX) as a Marker of Bone Metabolism in Non-metastatic Patients|Change in Bone Specific Alkaline Phosphatase as a Marker of Bone Metabolism|Change in Alkaline Phosphatase as a Marker of Bone Metabolism|Change in Lactic Acid Dehydrogenase (LDH) as a Marker of Bone Metabolism|Changes in Biomarker Expression in Bone Biopsy Samples	University of Washington|Prostate Cancer Foundation|National Cancer Institute (NCI)	Male	18 Years and older (Adult, Older Adult)	Phase 2	9	Other|NIH	Interventional	Allocation: Non-Randomized|Intervention Model: Parallel Assignment|Masking: None (Open Label)|Primary Purpose: Treatment	7819|NCI-2012-01898|P30CA015704	2013-06-18	2015-02-02	2015-09-18	2012-10-10	2018-12-04	2018-12-04	Seattle Cancer Care Alliance/University of Washington, Seattle, Washington, United States		https://ClinicalTrials.gov/show/NCT01703065
381	NCT02082314	Prospective Study Determining the Pain Response, Functional Interference and Quality of Life in Patients Undergoing Radiofrequency Ablation Assisted Vertebroplasty/ Cementoplasty	RFA	Completed	No Results Available	Neoplasms|Cementoplasty|Quality of Life	Procedure: RFA Vertebroplasty	Pain response|Functional Interference|Quality of Life|Side-effects	Sunnybrook Health Sciences Centre	All	18 Years and older (Adult, Older Adult)		10	Other	Observational	Observational Model: Cohort|Time Perspective: Prospective	RFA	2023-02-14	April 2016		2014-03-10		2016-10-14	Sunnybrook Health Sciences Centre, Toronto, Ontario, Canada		https://ClinicalTrials.gov/show/NCT02082314
382	NCT00922974	Image-Guided Radiosurgery or Stereotactic Body Radiation Therapy in Treating Patients With Localized Spine Metastasis		Completed	Has Results	Metastatic Cancer|Pain	Radiation: External beam radiation therapy|Radiation: Radiosurgery/SBRT	Percentage of Patients Receiving Radiosurgery/SBRT Per Protocol or With Minor Variation (Phase II)|Percentage of Patients With Complete or Partial Pain Response at 3 Months (Phase III)|Percentage of Participants With Pain Response Through Two Years (Phase III)|Percentage of Participants With Pain Relapse Through Two Years (Phase III)|Percentage of Patients With Adverse Events at 3 Months (Phase I…	Radiation Therapy Oncology Group|National Cancer Institute (NCI)|NRG Oncology	All	18 Years to 120 Years (Adult, Older Adult)	Phase 2|Phase 3	399	Other|NIH	Interventional	Allocation: Randomized|Intervention Model: Parallel Assignment|Masking: None (Open Label)|Primary Purpose: Treatment	RTOG-0631|CDR0000646803|NCI-2009-01687	2023-11-09	2023-01-18	April 6, 2020	2009-06-18	2019-05-16	2021-05-19	University of Colorado Cancer Center at UC Health Sciences Center, Aurora, Colorado, United States|Penrose Cancer Center at Penrose Hospital, Colorado Springs, Colorado, United States|George Bray Cancer Center at the Hospital of Central Connecticut - New Britain Campus, New Britain, Connecticut, United States|CCOP - Christiana Care Health Services, Newark, Delaware, United States|Baptist Cancer I…	"Study Protocol and Statistical Analysis Plan", https://ClinicalTrials.gov/ProvidedDocs/74/NCT00922974/Prot_SAP_000.pdf	https://ClinicalTrials.gov/show/NCT00922974
383	NCT00038194	Phase I Trial of Fixed Dose STI571 (Imatinib Mesylate) With Escalating Doses of Docetaxel in Patients With Metastatic Androgen-Independent Prostate Cancer		Completed	No Results Available	Prostate Cancer	Drug: imatinib mesylate|Drug: docetaxel		M.D. Anderson Cancer Center|Novartis	Male	Child, Adult, Older Adult	Phase 1	28	Other|Industry	Interventional	Allocation: N/A|Intervention Model: Single Group Assignment|Masking: None (Open Label)|Primary Purpose: Treatment	ID01-271	2023-10-01	2023-09-05	2023-09-05	2002-05-30		2018-10-31	U.T. M.D. Anderson Cancer Center, Houston, Texas, United States		https://ClinicalTrials.gov/show/NCT00038194
384	NCT04634227	Gemcitabine Plus Ascorbate for Sarcoma in Adults (Pilot)		Recruiting	No Results Available	Sarcoma|Soft Tissue Sarcoma|Unresectable Soft Tissue Sarcoma|Metastatic Bone Tumor|Bone Sarcoma	Drug: Ascorbate	Determine the 12 weeks progression free survival (PFS 12) at 12 weeks post treatment initiation|Assess overall survival of patients with unresectable or metastatic soft tissue and bone sarcoma treated with high dose ascorbate when administered intravenously concurrently with gemcitabine|Determine the tumor response as per RECIST 1.1 criteria|Incidence of Adverse Events (AE) Per CTCAE 4.03	Varun Monga, MD|University of Iowa Adolescent and Young Adult (AYA) Cancer Program|St. Baldrick's Foundation|University of Iowa	All	18 Years and older (Adult, Older Adult)	Early Phase 1	20	Other	Interventional	Allocation: N/A|Intervention Model: Single Group Assignment|Masking: None (Open Label)|Primary Purpose: Treatment	201802800 (Pilot)	2020-11-24	2023-12-31	2023-12-31	2020-11-18		2022-02-11	University of Iowa Hospitals & Clinics, Iowa City, Iowa, United States		https://ClinicalTrials.gov/show/NCT04634227
385	NCT01807065	Sipuleucel-T With or Without Radiation Therapy in Treating Patients With Hormone-Resistant Metastatic Prostate Cancer		Completed	Has Results	Adenocarcinoma of the Prostate|Bone Metastases|Hormone-resistant Prostate Cancer|Recurrent Prostate Cancer|Soft Tissue Metastases|Stage IV Prostate Cancer	Biological: sipuleucel-T|Radiation: external beam radiation therapy|Other: laboratory biomarker analysis	Progression-free Survival|Number of Participants With Grade 2 or Above Adverse Events	City of Hope Medical Center|National Cancer Institute (NCI)	Male	18 Years and older (Adult, Older Adult)	Phase 2	51	Other|NIH	Interventional	Allocation: Randomized|Intervention Model: Parallel Assignment|Masking: None (Open Label)|Primary Purpose: Treatment	12367|NCI-2013-00542	2013-06-07	2018-12-31	2019-12-31	2013-03-08	2020-08-25	2020-08-25	City of Hope Medical Center, Duarte, California, United States|South Pasadena Cancer Center, Pasadena, California, United States|Huntsman Cancer Institute, Univ. of Utah, Salt Lake City, Utah, United States	"Study Protocol and Statistical Analysis Plan", https://ClinicalTrials.gov/ProvidedDocs/65/NCT01807065/Prot_SAP_000.pdf	https://ClinicalTrials.gov/show/NCT01807065
386	NCT03468075	Gemcitabine Plus Ascorbate for Sarcoma in Adults		Terminated	Has Results	Sarcoma|Soft Tissue Sarcoma|Unresectable Soft Tissue Sarcoma|Metastatic Bone Tumor|Bone Sarcoma	Drug: Ascorbate|Drug: Gemcitabine	Tumor Response|Progression Free Survival|Overall Survival|Incidence of Adverse Events (AE) Per CTCAE 4.03	Mohammed Milhem, MBBS|University of Iowa Adolescent and Young Adult (AYA) Cancer Program|St. Baldrick's Foundation|University of Iowa	All	18 Years and older (Adult, Older Adult)	Phase 2	10	Other	Interventional	Allocation: N/A|Intervention Model: Single Group Assignment|Masking: None (Open Label)|Primary Purpose: Treatment	201802800 (Phase II)	2018-07-11	April 16, 2019	2020-10-19	2018-03-16	2020-12-10	2020-12-10	University of Iowa Hospitals and Clinics, Iowa City, Iowa, United States	"Study Protocol and Statistical Analysis Plan", https://ClinicalTrials.gov/ProvidedDocs/75/NCT03468075/Prot_SAP_000.pdf|"Informed Consent Form", https://ClinicalTrials.gov/ProvidedDocs/75/NCT03468075/ICF_001.pdf	https://ClinicalTrials.gov/show/NCT03468075
387	NCT00392938	Carbon-11 Acetate and Fludeoxyglucose F 18 PET Scan of the Bone in Patients With Metastatic Prostate Cancer That Has Spread to the Bone		Completed	No Results Available	Metastatic Cancer|Prostate Cancer	Drug: antiandrogen therapy|Drug: docetaxel|Diagnostic Test: C-11 acetate PET scan|Diagnostic Test: F-18 FDG PET scan|Diagnostic Test: Tc-99m bone scan|Diagnostic Test: CT scan of the chest, abdomen and pelvis	Correlation of pre-treatment and 3-month post-treatment carbon-11 (11C) acetate and fludeoxyglucose F 18 positron emission tomography (18F-FDG PET) images with changes in clinical response measures|Comparison of 11C acetate and 18F-FDG PET scanning results with bone scintigraphy to determine which best predicts clinical response|Correlation of changes in 11C acetate and 18F-FDG PET with changes i…	University of Washington|National Cancer Institute (NCI)	Male	18 Years to 120 Years (Adult, Older Adult)		11	Other|NIH	Observational	Observational Model: Case-Only|Time Perspective: Prospective	6129|P30CA015704|UWCC-6129|UWCC-06-0500-H/A|FHCRC-6129|CDR0000480347	2023-12-05	2023-05-10		2006-10-26		2017-03-13	Fred Hutchinson Cancer Research Center, Seattle, Washington, United States|University of Washington School of Medicine, Seattle, Washington, United States		https://ClinicalTrials.gov/show/NCT00392938
388	NCT02226276	Copper Cu 64-DOTA-Trastuzumab PET in Predicting Response to Treatment With Ado-Trastuzumab Emtansine in Patients With Metastatic HER2 Positive Breast Cancer		Completed	Has Results	Bone Metastases|HER2-positive Breast Cancer|Liver Metastases|Lung Metastases|Recurrent Breast Cancer|Soft Tissue Metastases|Stage IV Breast Cancer	Radiation: fludeoxyglucose F 18|Procedure: positron emission tomography|Procedure: computed tomography|Biological: trastuzumab|Radiation: copper Cu 64-DOTA-trastuzumab|Biological: ado-trastuzumab emtansine|Other: laboratory biomarker analysis	Relationship Between Average Tumor Uptake of Copper Cu 64-DOTA-trastuzumab as Measured by PET and Patient Best Response|Relationship Between Tumor Minimum Uptake of Copper Cu 64-DOTA-trastuzumab as Measured by PET and Patient Best Response	City of Hope Medical Center|National Cancer Institute (NCI)	Female	18 Years and older (Adult, Older Adult)	Not Applicable	10	Other|NIH	Interventional	Allocation: N/A|Intervention Model: Single Group Assignment|Masking: None (Open Label)|Primary Purpose: Diagnostic	14099|NCI-2014-01812	2015-01-07	2021-12-07	2021-12-07	2014-08-27	2022-07-20	2022-07-20	City of Hope Medical Center, Duarte, California, United States	"Study Protocol and Statistical Analysis Plan", https://ClinicalTrials.gov/ProvidedDocs/76/NCT02226276/Prot_SAP_000.pdf	https://ClinicalTrials.gov/show/NCT02226276
389	NCT03678883	9-ING-41 in Patients With Advanced Cancers		Recruiting	No Results Available	Cancer|Pancreatic Cancer|Sarcoma|Renal Cancer|Refractory Cancer|Refractory Neoplasm|Refractory Non-Hodgkin Lymphoma|Pancreatic Adenocarcinoma|Resistant Cancer|Neoplasm Metastasis|Neoplasm of Bone|Neoplasm, Breast|Neoplasm of Lung|Neoplasms,Colorectal|Neoplasms Pancreatic|Malignant Glioma|Malignancies|Malignancies Multiple|Bone Metastases|Bone Neoplasm|Bone Cancer|Pancreas Cancer|Pancreatic Neopla…	Drug: 9-ING-41|Drug: Gemcitabine - 21 day cycle|Drug: Doxorubicin.|Drug: Lomustine|Drug: Carboplatin.|Drug: Nab paclitaxel.|Drug: Paclitaxel.|Drug: Gemcitabine - 28 day cycle|Drug: Irinotecan	Parts 1/2: Number of participants with treatment-related adverse events as assessed by CTCAE v4.03	Actuate Therapeutics Inc.	All	18 Years and older (Adult, Older Adult)	Phase 1|Phase 2	350	Industry	Interventional	Allocation: Non-Randomized|Intervention Model: Parallel Assignment|Masking: None (Open Label)|Primary Purpose: Treatment	1801	2019-01-04	2023-11-22	2023-11-23	2018-09-20		2022-05-09	Mayo Clinic, Phoenix, Arizona, United States|UCSF Helen Diller Family Comprehensive Cancer Center, San Francisco, California, United States|Miami Cancer Institute, Miami, Florida, United States|Robert H. Lurie Comprehensive Cancer Center of Northwestern University, Chicago, Illinois, United States|Kansas University Cancer Center, Kansas City, Kansas, United States|University of Michigan, Ann Arbo…		https://ClinicalTrials.gov/show/NCT03678883
390	NCT03244020	Low Molecular Weight Heparin (LMWH) vs Aspirin for Venous Thromboembolism (VTE) Prophylaxis in Orthopaedic Oncology		Enrolling by invitation	No Results Available	Sarcoma|Soft Tissue Sarcoma|Bone Sarcoma|Bone Metastases|Venous Thromboembolism|Hematoma|Anticoagulant-induced Bleeding	Drug: Aspirin 325mg|Drug: Enoxaparin 40Mg/0.4mL Prefilled Syringe	Venous thromboembolism|Hematoma formation|Complication requiring return to operating room|Early chemoprophylaxis stop|Infection	Massachusetts General Hospital|Brigham and Women's Hospital|Beth Israel Deaconess Medical Center	All	18 Years and older (Adult, Older Adult)	Phase 4	1434	Other	Interventional	Allocation: Randomized|Intervention Model: Parallel Assignment|Masking: None (Open Label)|Primary Purpose: Prevention	2017P000382	2018-02-16	2023-12-31	2024-07-01	2017-08-09		April 7, 2022	Santiago Lozano-Calderon, Boston, Massachusetts, United States		https://ClinicalTrials.gov/show/NCT03244020
391	NCT04791228	A Pilot Study of Thermodox and MR-HIFU for Treatment of Relapsed Solid Tumors		Not yet recruiting	No Results Available	Solid Tumors|Soft Tissue Sarcoma|Ewing Sarcoma|Malignant Epithelial Neoplasm|Rhabdomyosarcoma|Wilms Tumor|Hepatic Tumor|Germ Cell Tumor|Bone Metastases	Device: Magnetic Resonance-Guided High Intensity Focused Ultrasound|Drug: Lyso-thermosensitive Liposomal Doxorubicin	Primary objective 1: Response of treated target lesion(s) assessed by CT or MRI|Primary objective 2: The number of participants with treatment-related adverse events as assessed by the Common Terminology Criteria of Adverse Events (CTCAE) v.5	Children's National Research Institute	All	12 Years and older (Child, Adult, Older Adult)	Phase 2	14	Other	Interventional	Allocation: N/A|Intervention Model: Single Group Assignment|Masking: None (Open Label)|Primary Purpose: Treatment	HIFU Thermodox PII	2022-06-01	2024-06-01	2024-06-01	2021-03-10		2022-03-14			https://ClinicalTrials.gov/show/NCT04791228
392	NCT01231347	QUILT-2.014: Gemcitabine and AMG 479 in Metastatic Adenocarcinoma of the Pancreas	GAMMA	Terminated	No Results Available	Adenocarcinoma of the Pancreas|Advanced Solid Tumors|Cancer|Cancer of Pancreas|Cancer of the Pancreas|Metastases|Metastatic Cancer|Metastatic Pancreatic Cancer|Pancreas Cancer|Pancreatic Cancer|Bone Metastases|Endocrine Cancer|Oncology|Oncology Patients|Solid Tumors|Advanced Malignancy	Drug: AMG 479|Drug: Placebo|Drug: gemcitabine	To determine if AMG 479 in combination with gemcitabine improves overall survival as compared with placebo in combination with gemcitabine in subjects with metastatic adenocarcinoma of the pancreas|Progression free survival|Objective response rate|Time to disease progression|Disease control rate|Number of subjects with adverse events	NantCell, Inc.|Takeda	All	18 Years and older (Adult, Older Adult)	Phase 3	800	Industry	Interventional	Allocation: Randomized|Intervention Model: Parallel Assignment|Masking: Triple (Participant, Care Provider, Investigator)|Primary Purpose: Treatment	20060540|GAMMA|QUILT-2.014	April 2011	2023-12-12	2023-12-12	2010-11-01		2016-10-27	Research Site, Fullerton, California, United States|Research Site, La Jolla, California, United States|Research Site, Los Angeles, California, United States|Research Site, Los Angeles, California, United States|Research Site, Rancho Mirage, California, United States|Research Site, Redondo Beach, California, United States|Research Site, Santa Maria, California, United States|Research Site, Chicago…		https://ClinicalTrials.gov/show/NCT01231347
393	NCT00004074	Interleukin-12 and Trastuzumab in Treating Patients With Cancer That Has High Levels of HER2/Neu		Completed	No Results Available	Advanced Adult Primary Liver Cancer|Anaplastic Thyroid Cancer|Bone Metastases|Carcinoma of the Appendix|Distal Urethral Cancer|Fallopian Tube Cancer|Gastrinoma|Glucagonoma|Inflammatory Breast Cancer|Insulinoma|Liver Metastases|Localized Unresectable Adult Primary Liver Cancer|Lung Metastases|Male Breast Cancer|Malignant Pericardial Effusion|Malignant Pleural Effusion|Metastatic Gastrointestinal C…	Biological: recombinant interleukin-12|Biological: ABI-007/carboplatin/trastuzumab	Maximum tolerated dose (MTD) determined according to dose-limiting toxicities (DLTs) graded using Common Terminology Criteria for Adverse Events version 2.0 (CTCAE v2.0)	National Cancer Institute (NCI)	All	18 Years and older (Adult, Older Adult)	Phase 1	15	NIH	Interventional	Allocation: N/A|Intervention Model: Single Group Assignment|Masking: None (Open Label)|Primary Purpose: Treatment	NCI-2012-01398|99H0185|U01CA076576|CDR0000067282	1999-08-01	2023-02-09		2003-10-29		2013-02-28	Ohio State University Medical Center, Columbus, Ohio, United States		https://ClinicalTrials.gov/show/NCT00004074
394	NCT03419442	Multi-academic Center Study of Xofigo Patients		Completed	No Results Available	Prostate Cancer, Castration Resistant	Drug: Xofigo|Drug: Taxotere|Drug: Jevtana	Overall survival|Time to symtomatic skeletal event(SSE)|Reasons for treatment discontinuation|Laboratory-based outcomes collected by questionnaire|Treatments received|Number of hospitalizations|PSA PFS|Non-laboratory based clinically relevant safety outcomes|hospital length of stay	Bayer	Male	18 Years and older (Adult, Older Adult)		150	Industry	Observational	Observational Model: Cohort|Time Perspective: Retrospective	19863	2018-12-03	2019-10-22	2019-10-22	2018-02-05		2020-10-22	Bayer US, Whippany, New Jersey, United States		https://ClinicalTrials.gov/show/NCT03419442
395	NCT01119118	ZD4054 With Positron Emission Tomography/Magnetic Resonance Imaging (PET/MRI) for Prostate Cancer		Terminated	Has Results	Prostate Cancer	Drug: ZD4054	The Number of Subjects Whose Tumor Lesion Size Changed After 6 Weeks of Treatment With ZD4054 Using PET and MRI Scans.|The Number of Subjects Whose Tumor Lesion Size Changed Using Positron Emission Tomography (PET) Imaging Alone.|The Number of Subjects Whose Tumor Lesion Size Changed Using Diffusion-weighted Imaging (DWI)-Magnetic Resonant Imaging (MRI) Alone|Number of Subjects Whose Tumor Lesion…	University of Wisconsin, Madison|AstraZeneca	Male	18 Years and older (Adult, Older Adult)	Phase 2	6	Other|Industry	Interventional	Allocation: N/A|Intervention Model: Single Group Assignment|Masking: None (Open Label)|Primary Purpose: Treatment	CO09805|NCI-2011-00736|A534260|SMPH/MEDICINE/MEDICINE*H|H-2009-0160	April 2010	2023-08-11	2023-11-11	2010-05-07	April 29, 2013	2019-11-21	University of Wisconsin Carbone Cancer Center, Madison, Wisconsin, United States		https://ClinicalTrials.gov/show/NCT01119118
396	NCT00055471	A Phase IIa. Open-label, Multicenter, Dose-escalation Study to Assess the Tolerability and Pharmacokinetics of ZD4054 (Zibotentan) Given Orally Once Daily in Subjects With Metastatic Prostate Cancer		Completed	Has Results	Prostatic Neoplasms|Metastases, Neoplasm	Drug: ZD4054 10 mg|Drug: ZD4054 15 mg|Drug: ZD4054 22.5 mg	Dose Limiting Toxicities (DLTs)|Total Prostate Specific Antigen (PSA) Concentration|Change in Total Prostate Specific Antigen (PSA)|Change in Serum Concentration of Bone Alkaline Phosphatase (ALP)|Change in Serum Concentration of Procollagen Type I N Propeptide (PINP)|Change in Serum Concentration of C-Terminal Telopeptide of Type I Collagen (CTx)|Change in Urine Concentration of Type I Collagen-…	AstraZeneca	Male	18 Years and older (Adult, Older Adult)	Phase 2	22	Industry	Interventional	Primary Purpose: Treatment	4054IL/0004	2023-06-03	2023-10-05	2023-10-05	2003-03-04	2012-08-31	2012-10-31	Research Site, Cleveland, Ohio, United States|Research Site, Madison, Wisconsin, United States		https://ClinicalTrials.gov/show/NCT00055471
397	NCT02981797	Assess Gamma H2AX Positivity in Circulating Prostate Cancer Cells Before and After Radium 223		Completed	No Results Available	Prostate Cancer|Prostate Adenocarcinoma	Other: Blood Collection During Standard of Care Treatment	Changes in Gamma H2AX Positivity|Changes in Circulating Prostate Cancer Cell Numbers|Pain Response|Changes in Narcotic Analgesic Use|PSA Response	H. Lee Moffitt Cancer Center and Research Institute|Bayer	Male	18 Years and older (Adult, Older Adult)		10	Other|Industry	Observational	Observational Model: Case-Only|Time Perspective: Prospective	MCC-17725|ONC-2013-067	2015-07-22	2017-08-29	2020-11-05	2016-12-05		2021-06-11	H. Lee Moffitt Cancer Center and Research Institute, Tampa, Florida, United States		https://ClinicalTrials.gov/show/NCT02981797
398	NCT00082927	Single-Dose Local Radiation Therapy Compared With Ibandronate in Treating Patients With Localized Metastatic Bone Pain		Completed	No Results Available	Metastatic Cancer|Pain|Prostate Cancer	Drug: ibandronate sodium		Cancer Research UK|National Cancer Institute (NCI)	All	18 Years and older (Adult, Older Adult)	Phase 3	580	Other	Interventional	Allocation: Randomized|Masking: None (Open Label)|Primary Purpose: Supportive Care	CRUK-NCRI-RT-02-01|CDR0000361728|EU-20224|RIB|ISRCTN86185157	April 2003		2023-07-11	2004-05-19		2013-06-26	William Harvey Hospital, Ashford-Kent, England, United Kingdom|North Devon District Hospital, Barnstaple, England, United Kingdom|Basingstoke and North Hampshire NHS Foundation Trust, Basingstoke, England, United Kingdom|Royal United Hospital, Bath, England, United Kingdom|Sussex Cancer Centre at Royal Sussex County Hospital, Brighton, England, United Kingdom|Bristol Haematology and Oncology Cent…		https://ClinicalTrials.gov/show/NCT00082927
399	NCT00171964	Efficacy and Tolerability of Zoledronic Acid With Radiotherapy in Pts With Advanced Osteolytic Bone Lesions		Completed	No Results Available	Pain|Neoplasm Metastasis|Cancer	Drug: Zoledronic acid in combination with therapy	Pain reduction|Time to pain reduction|Duration of pain reduction|Quality of life|Changes in parameters of bone turnover	Novartis Pharmaceuticals|Novartis	All	18 Years and older (Adult, Older Adult)	Phase 4	75	Industry	Interventional	Allocation: N/A|Intervention Model: Single Group Assignment|Masking: None (Open Label)|Primary Purpose: Treatment	CZOL446EDE06	2023-05-02	2023-12-08	2023-12-08	2005-09-15		2017-06-01	Novartis Investigative Site, Herne, Germany		https://ClinicalTrials.gov/show/NCT00171964
400	NCT05502315	Study of Cabozantinib and Nivolumab in Metastatic Castration Resistant Prostate Cancer	CANOPY	Not yet recruiting	No Results Available	Castration-resistant Prostate Cancer|Metastatic Cancer	Drug: Cabozantinib|Drug: Nivolumab	Radiographic Progression Free Survival (rPFS)|PSA Response|Overall Response Rate (ORR)|6-month rPFS in predefined subgroups|6-month PSA response in predefined subgroups|6-month ORR in predefined subgroups|rPFS|Overall Survival (OS)|Assess conversion of circulating tumor cell (CTC) count|Assess adverse events|Time to PSA Progression|Time to occurrence of first symptomatic skeletal event.|Time from…	Rana McKay, MD|Exelixis|Bristol-Myers Squibb|Hoosier Cancer Research Network	Male	18 Years and older (Adult, Older Adult)	Phase 2	50	Other|Industry	Interventional	Allocation: N/A|Intervention Model: Single Group Assignment|Masking: None (Open Label)|Primary Purpose: Treatment	HCRN GU21-517	2023-10-22	April 12, 2023	April 12, 2024	2022-08-16		2022-08-16			https://ClinicalTrials.gov/show/NCT05502315
401	NCT00559897	Zoledronic Acid and Positron Emission Tomography in Treating Patients With Advanced Non-Small Cell Lung Cancer		Terminated	Has Results	Lung Cancer|Metastatic Cancer	Other: 3'-deoxy-3'-[18F]FLT|Procedure: Single photon emission computed tomography	PET Response Rate	Barbara Ann Karmanos Cancer Institute|National Cancer Institute (NCI)	All	18 Years and older (Adult, Older Adult)	Phase 2	6	Other|NIH	Interventional	Allocation: N/A|Intervention Model: Single Group Assignment|Masking: None (Open Label)|Primary Purpose: Diagnostic	CDR0000543463|P30CA022453|WSU-2006-136	2023-03-08	April 2010	April 2011	2007-11-16	2015-02-04	2015-02-04	Barbara Ann Karmanos Cancer Institute, Detroit, Michigan, United States		https://ClinicalTrials.gov/show/NCT00559897
402	NCT00415779	ZANTE: Zometa and Taxotere in Hormone Refractory Prostate Cancer	ZANTE	Completed	No Results Available	Metastatic Prostate Cancer	Drug: docetaxel|Drug: zoledronic acid	to determine the maximum tolerated dose and dose limiting toxicity of docetaxel in the two treatment schedules|to determine the recommended docetaxel dose when combined with zoledronic acid for phase II studies|to determine which administration sequence of the combination permits a higher dosage of docetaxel|to describe the toxicity of the combination of the two drugs|to describe the effects of t…	National Cancer Institute, Naples	Male	18 Years and older (Adult, Older Adult)	Phase 1	36	Other	Interventional	Allocation: Non-Randomized|Intervention Model: Single Group Assignment|Masking: None (Open Label)|Primary Purpose: Treatment	ZANTE|EUDRACT 2006-000426-31	2023-07-06	2023-12-08	2023-07-09	2006-12-25		2010-02-24	Istituto Nazionale dei Tumori, Napoli, Italy|Ospedale Oncologico Regionale C.R.O.B. - Basilicata, Rionero in Vulture, Italy		https://ClinicalTrials.gov/show/NCT00415779
403	NCT00172068	Zoledronic Acid in the Treatment of Breast Cancer With Minimal Residual Disease in the Bone Marrow	MRD-1	Terminated	No Results Available	Primary Breast Cancer	Drug: Zoledronic acid Calcium/Vitamin D	Reduction of detected tumor cells in bone marrow|Tumor cell detection in bone marrow in comparison to the time point of primary surgery (Baseline).|Bone metastases-free survival|Disease-free survival|Bone mineral density|Number and localization of bone metastases	Novartis Pharmaceuticals|Novartis	Female	18 Years and older (Adult, Older Adult)	Phase 2	96	Industry	Interventional	Allocation: Randomized|Intervention Model: Parallel Assignment|Masking: None (Open Label)|Primary Purpose: Treatment	CZOL446GDE05	2023-01-02	2023-11-08		2005-09-15		2009-12-23	Novartis Invstigative Site, Bielefeld, Germany|Novartis Investigative Site, Hannover, Germany|Novartis Investigative Site, München, Germany|Novartis Investigative Site, Tuebingen, Germany		https://ClinicalTrials.gov/show/NCT00172068
404	NCT00086268	Non-small Cell Lung Cancer Study US75 (Z-PACT)	ZPACT	Completed	No Results Available	Non Small Cell Lung Carcinoma	Drug: zoledronic acid|Drug: Taxotere|Drug: Carboplatin		Novartis Pharmaceuticals|Novartis	All	18 Years and older (Adult, Older Adult)	Phase 3	250	Industry	Interventional	Allocation: Randomized|Intervention Model: Parallel Assignment|Masking: None (Open Label)|Primary Purpose: Prevention	CZOL446EUS75|US 75	April 2004	2023-10-07	2023-10-07	2004-07-01		2017-09-13	Clinical Research Consultants, Hoover, Alabama, United States|Arizona Oncology Assoc., Tucson, Arizona, United States|NEA Clinic, Jonesboro, Arkansas, United States|Highlands Oncology Group, Springdale, Arkansas, United States|NorthBay Cancer Center, Fairfield, California, United States|UCLA, Los Angeles, California, United States|Clinical Trials and Research Associates, Inc., Montebello, Califor…		https://ClinicalTrials.gov/show/NCT00086268
405	NCT00811369	Trial to Evaluate the Therapeutic Benefit of Fulvestrant in Combination With ZACTIMA in Postmenopausal Women With Bone Predominant, Hormone Receptor Positive Metastatic Breast Cancer	ZAMBONEY	Completed	No Results Available	Metastatic Breast Cancer	Drug: Fulvestrant ZACTIMA|Drug: Fulvestrant Placebo	Significant change in NTx level defined as a = 30% reduction in urinary NTx level from baseline.|Progression free survival (PFS)|Response to therapy|Improvement in pain	Ontario Clinical Oncology Group (OCOG)|AstraZeneca	Female	Child, Adult, Older Adult	Phase 2	126	Other|Industry	Interventional	Allocation: Randomized|Intervention Model: Parallel Assignment|Masking: Quadruple (Participant, Care Provider, Investigator, Outcomes Assessor)|Primary Purpose: Treatment	OCOG-2008-ZAMBONEY	2023-08-09	2023-10-12	2023-08-13	2008-12-19		2013-11-18	Cross Cancer Institute, Edmonton, Alberta, Canada|British Columbia Cancer Agency - Vancouver Centre, Vancouver, British Columbia, Canada|QE II Health Sciences Centre, Halifax, Nova Scotia, Canada|Juravinski Cancer Centre, Hamilton, Ontario, Canada|Grand River Regional Cancer Centre, Kitchener, Ontario, Canada|RSM Durham Regional Cancer Centre, Oshawa, Ontario, Canada|Ottawa Hospital Cancer Centre…		https://ClinicalTrials.gov/show/NCT00811369
406	NCT00051779	An Investigational Drug (CAL) Versus Zoledronic Acid (Zometa®) in Patients With Breast Cancer		Completed	No Results Available	Breast Neoplasms|Breast Cancer|Metastasis	Drug: CAL		Chugai Pharma USA	Female	18 Years and older (Adult, Older Adult)	Phase 1		Industry	Interventional	Primary Purpose: Treatment	CAL-03				2003-01-17		2005-06-24	University of Arkansas for Medical Sciences, Little Rock, Arkansas, United States|Highlands Oncology Group, Springdale, Arkansas, United States|Bay Area Cancer Research Group, Concord, California, United States|California Cancer Care, Inc., Greenbrae, California, United States|Institute of Cancer Therapies, Los Angeles, California, United States|San Diego Cancer Research Institute, Vista, Califor…		https://ClinicalTrials.gov/show/NCT00051779
[truncated: 114 more rows]

## Sheet: Table S2
Table S2: Clinical trials of bone metastases from pharma.id.informa.com
[truncated: 236 more rows]
[truncated: 30 more columns]

## Sheet: Table S3
Table S3: Merged clinical trials of bone metastases from both databases
[truncated: 652 more rows]
